# Supplementary material for: Rho GTPase signaling and mDia facilitate endocytosis via presynaptic actin
Source: eLife journal article supplement (doi:10.7554/elife.92755), 2023-12-05
Supplement: fig1-data1 [file elife-92755-fig1-data1-v1.zip]

## Sheet: Figure 1
	Figure 1A										Figure 1B			Figure 1C										Figure 1D			Figure 1E											Figure 1F				Figure 1G				Figure 1H
		norm. ΔF [Syph-pHluorin; 40Hz5s]									τ [s; Syph-pH; 40Hz5s]				norm. ΔF [vGAT-CypHer; 40Hz5s]									τ [s; vGAT; 40Hz5s]				norm. ΔF [Syph-pH; 40Hz5s]										τ [s; Syph-pH; 40Hz5s]				τ [s; vGLUT1-pH; 20Hz2s]				τ [s; vGLUT1-pH; 40Hz2s]
	time [s]	DMSO				JLY					DMSO	JLY		time [s]	DMSO				JLY					DMSO	JLY		time [s]	shCTR			shmDia1			shmDia1 + mDia1-WT				shCTR	shmDia1	shmDia1 + mDia1-WT		shCTR	shmDia1	shmDia1+3		shCTR	shmDia1	shmDia1+3
	0	-0.01025	-0.00165	-0.00554	0.013276	-0.00736	-0.00702	-0.00426	-0.00295		29.02	64.79		0	-0.03888	0.005484	-0.00389	0.060865	0.048255	0.035064	0.017334	0.019987		11.92	24.89		0	0.003699	-0.00764544	-0.00826871	0.00603724	0.000385827	-0.00919549	-0.0102192	-0.0139159	0.00119717		29.32	58.09	27.74		9.484	11.92	19.74		11.73	26.52	22.47
	2	-0.00239	0.00105	-0.00014	0.011028	0.001679	0.003339	0.007016	0.001609		34.14	67.95		2	-0.00923	-0.03062	0.054603	0.038056	0.064406	-0.00326	0.071564	0.055519		11.95	26.76		2	0.001109	0.000637091	0.00485443	0.00015649	-0.00253572	0.00747973	-0.00590764	0.00696644	0.00321142		33.06	71.45	37.85		11.06	16.21	13.93		11.08	17.14	19.64
	4	0.004434	-0.00313	0.002503	-1.4e-05	-0.0008	0.002095	0.003324	0.00267		33.78	54.6		4	0.018044	0.019486	0.056695	0.012235	0.053064	-0.07337	0.01533	0.030967		10.76	27.8		4	0.000717	-0.00214024	0.00278578	-0.000834969	0.00179263	0.00617525	0.00333023	0.00395038	0.00591569		26.65	64.55	26.11		7.618	17.36	16.77		18.26	28.4	30.22
	6	0.004772	0.000187	-0.00018	-0.00556	-0.0004	0.001419	-0.00268	0.001886		19.6	36.02		6	-0.04003	-0.01816	-0.01114	0.094538	0.026679	-0.04123	-0.03836	0.005072		8.792	18.98		6	-0.00091	-0.00565615	-0.0010711	-0.00165777	-0.00032139	-7.77978e-05	0.00777715	-0.00190189	-0.00121544						8.328	11.74	15.05		13.25	15.75	35.41
	8	0.003436	0.003549	0.003356	-0.01873	0.006885	0.000167	-0.0034	-0.00322					8	0.039939	-0.0153	-0.0412	0.024892	0.06573	-0.11402	0.007901	-0.03504					8	-0.00462	0.0148047	0.0016996	-0.00370099	0.000678652	-0.00438168	0.00501946	0.00490096	-0.00910883		one-way ANOVA with Tukey's post-test
	10	0.453375	0.42337	0.437454	0.277101	0.404569	0.382926	0.317877	0.374308		two-tailed t-test			10	0.034648	-0.03875	-0.03544	0.019246	0.018565	-0.10011	-0.03769	-0.00717		two-tailed t-test			10	0.299268	0.346925	0.293312	0.30225	0.262896	0.307925	0.296405	0.299009	0.360441		p-value				one-way ANOVA with Tukey's post-test				one-way ANOVA with Tukey's post-test
	12	0.842088	0.816312	0.816211	0.68459	0.790966	0.803535	0.747671	0.753724		p = 0.0153			12	-0.0259	0.004782	-0.06157	-0.00231	0.034663	-0.02375	-0.02453	-0.04264		p = 0.0006			12	0.701428	0.725404	0.694026	0.704032	0.698521	0.674571	0.716565	0.69164	0.771151		0.0007	shCTR vs. shmDia1			p-value				p-value
	14	1	1	1	1	1	1	1	1					14	-0.02154	0.022587	0.011787	-0.11784	-0.00507	-0.14822	-0.04124	-0.04719					14	1	1	1	0.982197	1	1	1	1	1		0.9797	shCTR vs. shmDia1 + mDia1-WT			0.0322	shCTR vs. shmDia1			0.1647	shCTR vs. shmDia1
	16	0.926177	0.971691	0.956264	0.918001	0.98619	0.997063	0.978297	0.943784					16	-0.3996	-0.32767	0.004717	-0.18801	-0.37944	-0.30804	-0.06307	-0.06647					16	0.974475	0.995142	0.980083	1	0.994377	0.974768	0.966325	0.991469	0.952646		0.0008	shmDia1 vs. shmDia1 + mDia1-WT			0.0051	shCTR vs. shmDia1+3			0.0261	shCTR vs. shmDia1+3
	18	0.832054	0.915545	0.890538	0.800288	0.951304	0.966189	0.924479	0.865998					18	-0.7791	-0.69156	-0.39687	-0.6307	-0.72018	-0.67897	-0.29582	-0.35995					18	0.919847	0.92511	0.904046	0.974273	0.957377	0.946953	0.884449	0.956108	0.879695						0.4694	shmDia1 vs. shmDia1+3			0.4836	shmDia1 vs. shmDia1+3
	20	0.743143	0.842131	0.818149	0.689893	0.901853	0.933585	0.870215	0.791602					20	-1	-0.89367	-0.70759	-0.97622	-1	-0.90342	-0.71933	-0.81808					20	0.859081	0.857962	0.828807	0.934182	0.904633	0.910958	0.805049	0.910394	0.817797
	22	0.65981	0.783526	0.741314	0.592185	0.859234	0.902037	0.814524	0.72087					22	-0.86722	-0.97124	-0.95189	-1	-0.93496	-0.94071	-1	-1					22	0.799638	0.785382	0.75298	0.892392	0.866481	0.878793	0.742993	0.865535	0.743898
	24	0.60054	0.715373	0.666688	0.504543	0.814288	0.869485	0.765381	0.653015					24	-0.77153	-0.77055	-0.87843	-0.83821	-0.7749	-0.86793	-0.97181	-0.97586					24	0.733905	0.717844	0.686027	0.856504	0.818124	0.822864	0.670434	0.811868	0.686256
	26	0.536538	0.667484	0.588913	0.433015	0.769062	0.839729	0.718901	0.588779					26	-0.698	-0.6993	-0.65596	-0.76469	-0.72694	-0.72835	-0.79962	-0.84463					26	0.682655	0.661901	0.623341	0.811157	0.793383	0.788943	0.619138	0.755686	0.625143
	28	0.47944	0.616083	0.525862	0.370686	0.731526	0.805285	0.676884	0.53264					28	-0.57921	-0.55611	-0.50573	-0.55211	-0.59805	-0.69206	-0.63353	-0.76042					28	0.624261	0.613131	0.569731	0.766946	0.748295	0.751854	0.575016	0.709658	0.573644
	30	0.431832	0.573259	0.465857	0.305738	0.695112	0.76744	0.634021	0.481515					30	-0.46804	-0.51229	-0.36517	-0.38012	-0.55429	-0.57294	-0.5232	-0.60879					30	0.575127	0.568924	0.527203	0.730556	0.722913	0.721712	0.533139	0.658625	0.528857
	32	0.388368	0.525044	0.416814	0.267736	0.660701	0.742156	0.59757	0.440639					32	-0.3509	-0.38668	-0.24762	-0.29892	-0.50532	-0.46883	-0.44105	-0.51042					32	0.529848	0.538075	0.479241	0.705172	0.701631	0.708914	0.496001	0.621463	0.490067
	34	0.349539	0.480769	0.379632	0.231056	0.628812	0.708915	0.566276	0.403329					34	-0.27204	-0.2656	-0.21357	-0.08479	-0.42829	-0.40086	-0.35225	-0.37761					34	0.490372	0.504061	0.440224	0.665525	0.683281	0.685241	0.46001	0.587233	0.447197
	36	0.314701	0.439697	0.343186	0.179514	0.602042	0.680812	0.534712	0.368176					36	-0.21893	-0.28184	-0.15923	-0.06321	-0.36577	-0.35957	-0.3538	-0.3412					36	0.454522	0.466813	0.413529	0.635984	0.660431	0.666807	0.430726	0.547523	0.412055
	38	0.282862	0.397705	0.314019	0.158063	0.573957	0.65074	0.50706	0.341474					38	-0.15323	-0.24973	-0.13246	-0.02899	-0.38451	-0.33436	-0.31853	-0.28753					38	0.420973	0.439441	0.378615	0.614743	0.634049	0.623178	0.388511	0.526879	0.381085
	40	0.258512	0.368285	0.284255	0.109838	0.549046	0.625007	0.4829	0.318286					40	-0.15702	-0.13689	-0.10212	0.007533	-0.30275	-0.30732	-0.27216	-0.27175					40	0.390831	0.407122	0.349109	0.58459	0.619626	0.614495	0.364509	0.498706	0.355726
	42	0.232878	0.33934	0.265795	0.08205	0.524273	0.599732	0.461358	0.298726					42	-0.11005	-0.13455	-0.06454	0.046836	-0.31213	-0.27444	-0.28197	-0.25531					42	0.368397	0.390431	0.330731	0.56745	0.608453	0.594323	0.335568	0.464058	0.329709
	44	0.20767	0.294882	0.244744	0.070459	0.503997	0.579049	0.440812	0.275281					44	-0.11656	-0.05862	-0.0985	0.118094	-0.30747	-0.32682	-0.26641	-0.19084					44	0.346994	0.376646	0.308032	0.544669	0.592151	0.57994	0.315569	0.441406	0.315312
	46	0.18181	0.275813	0.228218	0.044741	0.483004	0.548634	0.419155	0.260949					46	-0.05553	-0.03701	0.010956	0.081139	-0.31498	-0.29879	-0.28683	-0.20739					46	0.325137	0.354713	0.288539	0.53135	0.576907	0.556687	0.294442	0.420175	0.287879
	48	0.165595	0.246742	0.212489	0.023554	0.468917	0.526749	0.399503	0.246058					48	-0.08227	-0.0416	-0.0356	0.080557	-0.30899	-0.33718	-0.30959	-0.17553					48	0.309405	0.330173	0.269399	0.511484	0.563188	0.541856	0.273984	0.396125	0.264759
	50	0.146799	0.21696	0.197963	0.011198	0.456818	0.500115	0.38632	0.224935					50	-0.06903	-0.06586	-0.09016	0.13094	-0.27124	-0.31182	-0.32624	-0.13934					50	0.283598	0.319333	0.249665	0.506172	0.556858	0.530997	0.262549	0.385941	0.256331
	52	0.130678	0.197305	0.186925	-0.00621	0.432333	0.475852	0.371591	0.212696					52	-0.07553	-0.08124	-0.06985	0.083343	-0.27139	-0.23782	-0.30471	-0.17303					52	0.269488	0.311551	0.233637	0.493217	0.544592	0.519982	0.242204	0.364328	0.232356
	54	0.117139	0.182185	0.175526	-0.0258	0.420732	0.452038	0.356966	0.199967					54	-0.0692	-0.03967	-0.03937	0.051216	-0.28571	-0.27459	-0.35261	-0.14924					54	0.253206	0.299121	0.223703	0.477099	0.534537	0.505069	0.219149	0.33923	0.219022
	56	0.101796	0.158294	0.163588	-0.03822	0.409356	0.423559	0.34201	0.190549					56	-0.03136	0.032361	-0.08187	0.147462	-0.32584	-0.31223	-0.29271	-0.15952					56	0.240037	0.274211	0.208544	0.46407	0.524704	0.50664	0.213405	0.323871	0.206611
	58	0.092845	0.141159	0.148932	-0.04654	0.393182	0.41052	0.334119	0.181731					58	-0.04719	0.0122	-0.04077	0.057729	-0.2896	-0.28676	-0.37644	-0.16569					58	0.222242	0.268208	0.190033	0.44924	0.520929	0.496281	0.200777	0.309498	0.195132
	60	0.085995	0.118556	0.142376	-0.05827	0.381521	0.397473	0.3227	0.17401					60	-0.06514	-0.02191	-0.01976	0.091646	-0.3076	-0.32927	-0.33467	-0.15394					60	0.20842	0.255109	0.178887	0.44357	0.506387	0.472773	0.194246	0.291321	0.180468
	62	0.079525	0.107584	0.134881	-0.06833	0.371114	0.383646	0.308569	0.163872					62	-0.0645	0.001705	-0.18026	0.08999	-0.23475	-0.33826	-0.37373	-0.18011					62	0.194345	0.248678	0.170487	0.42959	0.500367	0.474114	0.187357	0.284955	0.169091
	64	0.068854	0.094093	0.12622	-0.09481	0.359044	0.377099	0.299964	0.154647					64	-0.04684	-0.0348	-0.07704	0.059266	-0.31	-0.34511	-0.36617	-0.15001					64	0.18559	0.236942	0.164321	0.419141	0.487075	0.463014	0.171472	0.266823	0.15722
	66	0.06114	0.081033	0.120628	-0.07936	0.349805	0.360214	0.291177	0.149909					66	-0.0102	0.050573	-0.10613	0.015241	-0.30469	-0.37508	-0.43036	-0.18844					66	0.171351	0.22741	0.154414	0.40891	0.478044	0.444278	0.169593	0.252858	0.14394
	68	0.055206	0.061339	0.116682	-0.10839	0.338549	0.347187	0.281728	0.147638					68	-0.03879	-0.022	-0.14153	0.016247	-0.28102	-0.39359	-0.37544	-0.16748					68	0.16688	0.223894	0.151736	0.400506	0.464856	0.451185	0.163504	0.239413	0.136972
	70	0.043218	0.044137	0.108372	-0.11567	0.329404	0.327897	0.274385	0.140327					70	-0.08161	-0.01581	-0.17938	-0.03608	-0.3226	-0.38494	-0.43911	-0.1539					70	0.153206	0.212137	0.140971	0.387865	0.46459	0.435237	0.155065	0.230524	0.125968
	72	0.043222	0.032917	0.10469	-0.12432	0.323245	0.312441	0.266073	0.130127					72	-0.06773	0.023875	-0.12043	-0.04768	-0.31315	-0.39054	-0.41515	-0.22822					72	0.144522	0.204128	0.132697	0.378462	0.455671	0.435288	0.151615	0.213813	0.114697
	74	0.034429	0.020372	0.10131	-0.12845	0.315381	0.306978	0.25968	0.129688					74	-0.08805	0.036784	-0.18513	0.035294	-0.35116	-0.40432	-0.45286	-0.22524					74	0.134814	0.192091	0.127703	0.373772	0.452181	0.411671	0.143227	0.202431	0.103665
	76	0.03122	0.010115	0.090802	-0.14331	0.306884	0.297305	0.255212	0.123146					n =	5	9	5	4	7	11	6	5					76	0.121041	0.181076	0.121657	0.364167	0.445694	0.403329	0.135132	0.190978	0.102208
	78	0.024942	-9e-05	0.083732	-0.1421	0.302842	0.285043	0.249123	0.117501						23				29								78	0.115678	0.176105	0.114629	0.35623	0.436034	0.407529	0.131115	0.188335	0.0985594
	80	0.019015	-0.01197	0.080267	-0.1514	0.294589	0.266659	0.244184	0.113341																		80	0.111377	0.171505	0.108912	0.353294	0.437815	0.396078	0.129813	0.173837	0.0908207
	82	0.01565	-0.01853	0.075414	-0.15376	0.285838	0.257385	0.236157	0.112289																		82	0.104296	0.164074	0.0982269	0.343679	0.432651	0.375223	0.130936	0.165032	0.0800285
	84	0.016979	-0.0251	0.071924	-0.15212	0.278691	0.244359	0.231874	0.108481																		84	0.099921	0.151707	0.0927022	0.338802	0.428022	0.369195	0.11129	0.158799	0.0680304
	86	0.012644	-0.03631	0.068407	-0.16685	0.272755	0.237524	0.226463	0.10848																		86	0.093974	0.146836	0.0889885	0.325987	0.418864	0.362551	0.112846	0.144778	0.0661875
	88	0.010744	-0.05168	0.065024	-0.17438	0.268477	0.23087	0.219145	0.106283																		88	0.08564	0.142122	0.0883292	0.314958	0.421988	0.361954	0.108966	0.137859	0.062739
	90	0.009929	-0.05517	0.059427	-0.16548	0.26747	0.22289	0.212059	0.09849																		90	0.077979	0.141702	0.0780153	0.306602	0.406978	0.355657	0.105806	0.13498	0.0673496
	92	0.008773	-0.0714	0.053089	-0.18106	0.259579	0.20433	0.208393	0.099712																		92	0.071376	0.125865	0.0789553	0.300591	0.412954	0.337539	0.111255	0.111853	0.0548045
	94	0.001401	-0.07471	0.053148	-0.18648	0.256659	0.211228	0.20458	0.101489																		94	0.06717	0.129101	0.0702456	0.295852	0.398254	0.337654	0.112846	0.107875	0.0494351
	96	-0.00088	-0.07939	0.048191	-0.19152	0.251418	0.191298	0.204329	0.098588																		96	0.063081	0.120613	0.0701487	0.287873	0.40295	0.338077	0.0965312	0.107759	0.0382771
	98	-0.00823	-0.07822	0.05078	-0.19779	0.24904	0.196365	0.197704	0.096469																		98	0.051866	0.116485	0.0636787	0.280366	0.398807	0.33989	0.0972631	0.0974474	0.0379603
	n =	7	3	8	5	12	8	8	8																		n =	15	6	7	9	7	5	6	8	7
		23				36																						28			21			21
[truncated: 28 more columns]
