# Supplementary material for: Rho GTPase signaling and mDia facilitate endocytosis via presynaptic actin
Source: eLife journal article supplement (doi:10.7554/elife.92755), 2023-12-05
Supplement: fig1-figsupp1-data1 [file elife-92755-fig1-figsupp1-data1-v1.zip]

## Sheet: Figure 1 S1
	Figure 1 S1A			Figure 1 S1B			Figure 1 S1C														Figure 1 S1D				Figure 1 S1E										Figure 1 S1F			Figure 1 S1G				Figure 1 S1I
								norm. ΔF [Syph-pHluorin; 40Hz5s]																		norm. ΔF [Syph-pHluorin; 40Hz5s]
	Fmax/F0 [Syph-pH; 40Hz5s]			Fmax/F0 [Syph-pH; 40Hz5s]			time [s]	DMSO				JY				JL					τ [s; Syph-pH; 40Hz5s]				time [s]	DMSO				Y					τ [s; Syph-pH; 40Hz5s]				Fmax/F0 [vGLUT1-pH; 20Hz2s]				norm. ΔF [vGLUT1-pH; 20Hz2s]
	DMSO	JLY		DMSO	JLY		0	-0.01025	-0.00165	0.033474	0.017425	-0.00546	-0.01398	0.021107	0.034035	-0.00232	-0.0241	0.005395	0.009751		DMSO	JY	JL		0	0.000164355	-0.00845104	0.033474	0.017425	0.00415532	0.00548769	-0.01232	-0.00268		DMSO	Y			shCTR	shmDia1+3		time [s]	shCTR				shmDia1
	1.57893	1.64777		1	1.01365		2	-0.00239	0.00105	-0.02209	-0.01291	0.007656	0.006388	0.00222	-0.01567	0.003034	0.006357	-0.01278	0.0013		18.96	31.99	14.23		2	0.00159509	-0.0101846	-0.02209	-0.01291	0.00187787	0.00327573	0.003501	-0.02133		12.67	9.403			1.88001	1.9392		0	-0.03737	0.016177	-0.02374	-0.06393	-0.0304	-0.03005	-0.03008
	1.64218	1.53698		1	0.901757		4	0.004434	-0.00313	-0.00321	-0.00291	0.004143	0.002252	-0.01136	-0.01406	0.002078	0.008993	0.000375	-0.01166		23.68	24.51	18.84		4	0.000529363	0.00585592	-0.00321	-0.00291	-7.58892e-05	-0.00269978	0.012079	0.00545		21.98	29.77			2.14684	2.12766		2	-0.01704	-0.03034	-0.00376	-0.07503	-0.02998	-0.02369	-0.01638
	1.98365	1.8149		1	0.835958		6	0.004772	0.000187	-0.00817	-0.00161	-0.00071	0.007216	-0.01196	-0.00431	0.000675	0.004069	0.007008	0.000607		14.16	27.37	22.01		6	-0.00101365	0.0128644	-0.00817	-0.00161	-0.00547541	-0.00249072	-0.00326	0.018554		14.16	17.89			2.01028	1.68867		4	0.007838	-0.08137	-0.02741	-0.04607	-0.01196	-0.06573	-0.01425
	1.48566	2.34716		1	1.15081		8	0.003436	0.003549	-0.0203	0.006685	-0.00564	-0.00188	-0.03438	0.004505	-0.00347	0.00468	0.026412	-0.04452		18.98	30.26	17.62		8	-0.00127515	-8.46824e-05	-0.0203	0.006685	-0.000481896	-0.00357292	-0.00054	0.040018		18.98	23.78			2.01238	1.91294		6	0.078767	-0.07302	-0.0107	-0.03085	0.086119	-0.04933	-0.00261
							10	0.453375	0.42337	0.261635	0.208885	0.470219	0.342173	0.202611	0.320641	0.394161	0.3967	0.171529	0.423226						10	0.232212	0.285797	0.261635	0.208885	0.261519	0.271838	0.229204	0.353822						1.73802	1.59061		8	0.179159	0.168553	0.06561	0.215881	0.140082	0.168798	0.06332
	two-tailed t-test			one sample t-test			12	0.842088	0.816312	0.704158	0.644367	0.835166	0.755841	0.622246	0.709543	0.802229	0.80793	0.570655	0.791262		one-way ANOVA with Tukey's post-test				12	0.645756	0.695657	0.704158	0.644367	0.67932	0.685341	0.652559	0.719048		two-tailed t-test				1.46352	1.66668		10	0.74799	0.824588	0.066021	0.177026	0.743515	0.781195	0.063262
	p = 0.4638			p = 0.7464			14	1	1	0.995939	0.974214	1	1	0.993991	0.999949	1	1	0.981976	0.988754		p-value				14	1	1	0.995939	0.974214	1	1	0.961957	0.998954		p = 0.5258				1.7063	1.60115		12	0.975522	1	0.760305	0.639937	0.993024	0.997247	0.705079
							16	0.926177	0.971691	0.924005	0.983079	0.966664	0.982316	0.94987	0.942687	0.927258	0.960727	0.9043	0.937776		0.0091	DMSO vs. JY			16	0.885165	0.903926	0.924005	0.983079	0.830524	0.948542	0.939744	0.948445						1.65247	1.75512		14	0.85522	0.911257	1	0.981078	0.89294	0.930256	1
							18	0.832054	0.915545	0.827065	0.919487	0.926325	0.915466	0.909935	0.883511	0.822629	0.883788	0.797199	0.854032		0.9477	DMSO vs. JL			18	0.733095	0.819817	0.827065	0.919487	0.652294	0.865616	0.86104	0.890188						1.49813	1.81881		16	0.66444	0.72031	0.888625	0.94846	0.697133	0.807896	0.951249
							20	0.743143	0.842131	0.745261	0.856878	0.865011	0.833882	0.850725	0.808609	0.721408	0.800279	0.691263	0.769382		0.0058	JY vs. JL			20	0.605212	0.726054	0.745261	0.856878	0.510275	0.786407	0.785085	0.822354									18	0.504965	0.51351	0.664259	0.593095	0.55187	0.633746	0.763382
							22	0.65981	0.783526	0.650852	0.790196	0.813673	0.753921	0.768961	0.756487	0.628203	0.724748	0.62688	0.697271						22	0.494111	0.660612	0.650852	0.790196	0.407304	0.716666	0.679759	0.758127						D'Agostino & Pearson test			20	0.38918	0.398251	0.522005	0.517467	0.459305	0.490637	0.635647
							24	0.60054	0.715373	0.557081	0.737947	0.763556	0.684949	0.734506	0.69434	0.540577	0.645615	0.553668	0.646228						24	0.417267	0.587058	0.557081	0.737947	0.319306	0.656742	0.603355	0.718187						p-value			22	0.289098	0.287566	0.38254	0.42754	0.401558	0.443929	0.545131
							26	0.536538	0.667484	0.473903	0.669049	0.715156	0.61727	0.683412	0.632851	0.470615	0.569389	0.511881	0.592247						26	0.356913	0.524728	0.473903	0.669049	0.260653	0.604026	0.545275	0.669761						0.6382	0.5523		24	0.233934	0.251926	0.273893	0.268275	0.339586	0.427743	0.467011
							28	0.47944	0.616083	0.446284	0.613145	0.667816	0.562093	0.648558	0.593783	0.403816	0.50534	0.471578	0.542802						28	0.3085	0.479557	0.446284	0.613145	0.202308	0.554283	0.468702	0.620036									26	0.182269	0.243079	0.213525	0.241293	0.301745	0.363072	0.413069
							30	0.431832	0.573259	0.392031	0.576007	0.630751	0.520966	0.595789	0.551463	0.353388	0.459836	0.434699	0.488334						30	0.262719	0.414532	0.392031	0.576007	0.17244	0.514451	0.418141	0.570486						two-tailed t-test			28	0.119611	0.218302	0.151976	0.125076	0.266637	0.348316	0.377436
							32	0.388368	0.525044	0.315174	0.511076	0.588577	0.479998	0.56108	0.501649	0.304771	0.405763	0.391929	0.425668						32	0.22178	0.392479	0.315174	0.511076	0.141345	0.48216	0.358216	0.531421						p = 0.9937			30	0.101824	0.226203	0.088449	0.122449	0.252848	0.287869	0.336713
							34	0.349539	0.480769	0.268159	0.460226	0.554242	0.431427	0.500065	0.47218	0.260526	0.362749	0.364768	0.414102						34	0.189082	0.366031	0.268159	0.460226	0.131138	0.449456	0.3299	0.488352									32	0.097695	0.206615	0.061191	0.131658	0.226655	0.311537	0.319656
							36	0.314701	0.439697	0.23964	0.402055	0.520829	0.397436	0.463957	0.420819	0.215664	0.324445	0.337962	0.329559						36	0.173955	0.343061	0.23964	0.402055	0.108947	0.420265	0.295448	0.445276									34	0.084795	0.191815	0.035587	0.070518	0.220875	0.245882	0.294181
							38	0.282862	0.397705	0.190575	0.346123	0.48452	0.361346	0.429803	0.384164	0.187353	0.29155	0.345061	0.304702						38	0.147261	0.319529	0.190575	0.346123	0.0932744	0.393091	0.268457	0.405402									36	0.05324	0.13223	0.025769	0.048543	0.204235	0.228601	0.26731
							40	0.258512	0.368285	0.150689	0.307523	0.456409	0.335477	0.413509	0.351985	0.149366	0.257947	0.31033	0.260092						40	0.133611	0.299603	0.150689	0.307523	0.0885242	0.375325	0.247516	0.373084									38	0.040654	0.134632	0.006658	0.056668	0.200444	0.220697	0.274184
							42	0.232878	0.33934	0.125981	0.266973	0.434678	0.31195	0.388962	0.329756	0.135703	0.23368	0.286421	0.27869						42	0.128625	0.278336	0.125981	0.266973	0.0838881	0.355274	0.208401	0.331683									40	0.057874	0.142328	-0.01744	0.059233	0.175872	0.216338	0.21814
							44	0.20767	0.294882	0.104178	0.21417	0.40403	0.292147	0.342478	0.293034	0.114021	0.1995	0.262854	0.199258						44	0.107257	0.243009	0.104178	0.21417	0.0675994	0.339401	0.186183	0.301806									42	0.040545	0.088662	-0.02533	0.066471	0.184535	0.171005	0.222048
							46	0.18181	0.275813	0.088032	0.174591	0.379143	0.27145	0.323513	0.269233	0.090058	0.173104	0.256305	0.156307						46	0.0967985	0.253248	0.088032	0.174591	0.0571236	0.318976	0.158477	0.27156									44	0.015986	0.127929	-0.05408	0.079136	0.155429	0.186615	0.207516
							48	0.165595	0.246742	0.04594	0.140386	0.353949	0.24792	0.324113	0.248015	0.074222	0.150642	0.227601	0.123405						48	0.0944909	0.218817	0.04594	0.140386	0.0569085	0.30341	0.145249	0.235798									46	0.0256	0.114161	-0.07531	-0.0441	0.166319	0.130064	0.196553
							50	0.146799	0.21696	0.030512	0.107321	0.330275	0.234786	0.264493	0.21328	0.05313	0.130585	0.21923	0.112139						50	0.085497	0.208384	0.030512	0.107321	0.0618132	0.290301	0.11712	0.211393									48	0.013196	0.114107	-0.06863	0.003105	0.167131	0.094075	0.188751
							52	0.130678	0.197305	0.002074	0.076672	0.307788	0.214892	0.252538	0.196331	0.038034	0.110644	0.207549	0.105119						52	0.0896478	0.204418	0.002074	0.076672	0.0467201	0.279932	0.106939	0.183647									50	0.004248	0.043906	-0.09843	-0.03875	0.151762	0.139541	0.181181
							54	0.117139	0.182185	0.000559	0.040785	0.289351	0.202213	0.230699	0.187381	0.026971	0.099144	0.198494	0.021313						54	0.081168	0.17827	0.000559	0.040785	0.0345674	0.268524	0.086473	0.162737									52	-0.01127	0.05653	-0.09568	-0.01739	0.144411	0.136648	0.157414
							56	0.101796	0.158294	-0.02291	0.014962	0.266642	0.180171	0.21079	0.172603	0.012577	0.079762	0.187509	-0.01314						56	0.0754379	0.174151	-0.02291	0.014962	0.0379565	0.257375	0.06502	0.135913									54	-0.01035	0.093741	-0.11587	-0.07012	0.152479	0.127783	0.153254
							58	0.092845	0.141159	-0.02457	-0.01525	0.252285	0.172283	0.189209	0.143408	0.001725	0.075838	0.164274	0.003704						58	0.0738941	0.165057	-0.02457	-0.01525	0.0306592	0.245491	0.073618	0.130433									56	-0.00657	0.050743	-0.09623	-0.07931	0.137038	0.10214	0.135124
							60	0.085995	0.118556	-0.07507	-0.05213	0.235381	0.16261	0.148064	0.132598	-0.0089	0.063226	0.162428	-0.06731						60	0.0646041	0.156248	-0.07507	-0.05213	0.0240831	0.24093	0.064937	0.091501									58	-0.01112	0.047558	-0.10913	0.007069	0.134467	0.139495	0.125781
							62	0.079525	0.107584	-0.07318	-0.08843	0.214998	0.150693	0.133121	0.108311	-0.01432	0.050226	0.152702	-0.06852						62	0.066457	0.140421	-0.07318	-0.08843	0.029397	0.231288	0.034247	0.078115									60	-0.02812	0.046063	-0.11853	-0.02268	0.128749	0.097484	0.114324
							64	0.068854	0.094093	-0.10218	-0.11165	0.196028	0.135284	0.115035	0.095561	-0.02312	0.038928	0.15624	-0.05283						64	0.0559961	0.130066	-0.10218	-0.11165	0.0218086	0.22604	0.045165	0.056624									62	-0.04151	0.047889	-0.12626	-0.07615	0.126444	0.072611	0.113935
							66	0.06114	0.081033	-0.10613	-0.14762	0.182977	0.128578	0.115604	0.066317	-0.03494	0.033322	0.143079	-0.10137						66	0.0552085	0.125745	-0.10613	-0.14762	0.0215487	0.219879	0.002298	0.049788									64	-0.02442	0.049747	-0.1382	-0.04628	0.133267	0.069638	0.106217
							68	0.055206	0.061339	-0.12629	-0.15629	0.168398	0.115091	0.102406	0.05695	-0.03668	0.022761	0.140964	-0.10515						68	0.0502974	0.120431	-0.12629	-0.15629	0.00625419	0.205302	0.011996	0.026262									66	-0.03313	0.03616	-0.14627	0.039781	0.108303	0.080154	0.093429
							70	0.043218	0.044137	-0.13258	-0.17615	0.160791	0.09761	0.063381	0.044289	-0.047	0.016994	0.108926	-0.13218						70	0.0400815	0.116202	-0.13258	-0.17615	0.0161846	0.198827	-0.00944	0.006422									68	-0.01919	0.096212	-0.16303	0.004653	0.108824	0.11159	0.090555
							72	0.043222	0.032917	-0.17183	-0.1936	0.149494	0.0905	0.058021	0.045168	-0.05495	0.004675	0.109277	-0.13616						72	0.0454555	0.117992	-0.17183	-0.1936	0.0050226	0.194159	-0.00306	-0.00579									70	-0.03973	0.04058	-0.14182	-0.02925	0.117857	0.049629	0.086921
							74	0.034429	0.020372	-0.17323	-0.23813	0.13867	0.086597	0.05631	0.028236	-0.06973	-0.00021	0.129367	-0.16282						74	0.0364078	0.107156	-0.17323	-0.23813	0.00728439	0.182936	-0.01679	-0.02567									72	-0.03303	0.046347	-0.16431	-0.0423	0.102301	0.084123	0.072929
							76	0.03122	0.010115	-0.17845	-0.25872	0.129289	0.080453	0.047634	0.002203	-0.07156	-0.01009	0.110749	-0.15535						76	0.0373406	0.0982612	-0.17845	-0.25872	-0.00106904	0.174657	-0.01091	-0.03226									74	-0.04597	0.039267	-0.16288	-0.03267	0.108221	0.06705	0.063583
							78	0.024942	-9e-05	-0.1805	-0.27923	0.11464	0.067799	0.009529	0.001864	-0.07983	-0.01129	0.098727	-0.20266						78	0.033126	0.0840633	-0.1805	-0.27923	-0.00979485	0.168654	-0.019	-0.03365									76	-0.0522	0.029139	-0.18108	-0.08917	0.105129	0.040162	0.061117
							n =	7	4	7	6	5	4	5	5	5	4	6	6						n =	7	5	7	6	4	4	5	5									78	-0.0485	0.039958	-0.17219	-0.05464	0.100198	0.065076	0.059057
								24				19				21										25				18												80	-0.03672	0.051451	-0.19896	-0.05052	0.100645	0.032549	0.054882
																																										82	-0.05385	0.030773	-0.17054	-0.08012	0.108602	0.00866	0.041037
																																										84	-0.04387	0.053781	-0.18548	-0.01433	0.086625	-0.01116	0.056321
																																										86	-0.05923	0.039927	-0.18091	-0.03624	0.093426	0.031438	0.043079
																																										88	-0.06421	0.061219	-0.1763	-0.06694	0.079463	0.025215	0.045144
																																										90	-0.05838	0.021176	-0.19031	-0.03524	0.082108	0.048322	0.023986
																																										92	-0.05171	0.047529	-0.19408	-0.09391	0.095819	-0.00795	0.019072
																																										94	-0.06427	0.033929	-0.20463	-0.06933	0.08817	0.023363	0.03265
																																										96	-0.05647	0.038287	-0.22193	-0.09681	0.073012	-0.01285	0.017775
																																										n =	7	3	3	4	7	3	3
																																											17				19
[truncated: 27 more columns]
