# Supplementary material for: Rho GTPase signaling and mDia facilitate endocytosis via presynaptic actin
Source: eLife journal article supplement (doi:10.7554/elife.92755), 2023-12-05
Supplement: fig2-data1 [file elife-92755-fig2-data1-v1.zip]

## Sheet: Figure 2
	Figure 2C			Figure 2D			Figure 2G
	SV/µm2			SV/µm2 in shmDia1+3			SV/µm2
	shCTR	shmDia1+3		Vehicle	TTX		WT	mDia1KO
	160.171	101.654		39.9665	119.912		153.097	140.398
	56.9917	30.7264		76.4718	159.76		67.5613	32.1375
	105.99	54.2311		204.521	87.0583		206.44	46.5419
	58.2125	117.247		37.1975	148.775		127.066	113.059
	167.098	118.812		78.7431	87.7675		206.94	147.024
	44.4408	55.333		117.281	116.699		71.999	134.608
	126.376	132.015		57.8512	90.0713		71.55	50.9629
	88.0908	5.47287		105.067	185.557		56.2845	103.253
	74.9078	46.8104		92.8899	70.4214		86.2858	92.6846
	38.3333	20.1789		59.2922	34.6432		67.3923	42.6936
	145.644	33.1263		68.3465	119.039		127.231	84.1663
	136.728	75.8882		119.352	191.595		27.8824	129.74
	145.933	88.1987		120.166	83.2508		33.9093	62.0624
	89.9357	272.363		179.605	77.2918		59.1029	94.721
	43.3627	279.132		47.124	148.744		120.791	72.3774
	155.214	21.9146		86.2948	88.762		42.5042	56.2902
	142.015	27.0507		105.213	81.6718		84.6242	19.2322
	98.314	114.896		91.2834	81.3786		75.2904	99.7502
	61.59	208.903		103.212	120.247		105.708	183.405
	92.8987	61.2289		254.211	121.505		115.689	59.8243
	63.0733	129.941		43.1582	164.444		81.2074	57.9586
	41.81	44.6777		105.174	96.274		88.5977	33.8146
	92.8746	34.7663		110.581	57.7622		122.185	71.0003
	51.2193	307.331		153.772	95.167		152.092	53.0845
	57.9117	37.7994		78.1687	70.3901		72.2006	66.3775
	92.6278	59.3471		100.679	59.3334		129.578	71.833
	78.4801	16.0632		213.309	56.1298		126.061	79.5993
	152.403	70.6336		139.644	81.1342		130.597	66.1802
	43.2524	8.83779		244.636	127.077		261.842	33.2203
	32.6201	8.99132		88.1931	96.7766		181.631	57.7815
	36.9601	21.1734		67.2564	118.116		251.268	98.2261
	74.7646	55.5611		49.016	79.4429		173.241	68.1764
	106.553	15.105		118.338	138.922		152.48	44.8987
	80.1769	78.2835		93.925	82.1716		140.701	155.226
	63.2862	43.8225		39.7915	55.9618		138.845	69.0961
	108.692	207.17		103.553	163.055		124.804	51.2145
	63.1997	5.77935		195.591	114.402		94.1018	32.1064
	72.468	36.247		113.081	63.2385		91.5735	170.866
	161.353	118.063		98.1063	67.2777		156.665	68.0071
	214.74	95.4094		110.638	141.029		103.535	185.981
	33.6032	34.8648		43.4232	90.2491		127.156	80.2692
	61.8651	25.0781		92.7709	119.58		182.552	134.944
	132.457	183.591		67.8745	163.8		82.7799	116.115
	84.4959	51.5162		231.496	140.677		168.955	89.5217
	56.755	65.4512		30.0126	61.9672		120.702	115.559
	18.9102	101.963		25.6732	237.447		83.7307	121.977
	46.5448	66.5834		69.0962	60.2024		52.3537	95.1354
	37.717	56.3076		126.447	38.9346		55.4024	87.744
	113.652	35.6325		145.881	109.606		41.9297	29.8137
	146.666	47.9086		165.619	142.989		168.148	148.753
	47.7128	47.3518		58.4604	168.16		92.5394	75.0282
	115.178	54.534		76.3671	111.942		123.826	75.0376
	94.7507	32.9838		110.42	135.139		74.7945	91.7267
	40.9899	57.9175		113.096	129.868		113.928	174.939
	146.234	25.3997		100.684	122.794		82.6983	44.1207
	52.4663	15.4887		100.733	55.964		53.5293	194.935
	78.0682	38.8931		78.9903	61.1852		67.0636	86.4
	58.6999	30.2158		171.467	68.0925		155.553	72.4807
	102.194	6.63459		88.9988	79.6966		70.0118	46.123
	114.064	58.2015		38.6231	65.5427		90.2754	129.666
	145.193	35.1235		34.7633	135.534		186.645	203.183
	146.585	64.5706		72.5616	99.1213		113.513	43.8268
	113.271	193.508		19.931	114.37		182.538	21.4347
	83.8484	44.083		75.2727	49.3397		134.862	54.9262
	99.5985	93.0929		124.422	88.8015		144.821	66.2757
	55.033	289.971		108.714	100.443		74.416	87.0239
	77.8335	23.0315		88.2726	147.476		36.0311	71.9901
	124.323	39.2381		138.986	57.7794		98.1416	108.456
	74.4242	26.3258		83.376	286.664		262.154	48.6623
	67.8623	69.0041		266.822	141.475		83.2046	34.7419
	181.289	94.38		143.719	131.68		40.6692	38.0426
	36.6413	49.3536		68.7515	126.773		85.4526	58.7868
	138.821	84.534		82.5893	95.7517		140.87	80.3914
	52.5386	11.5789		42.1091	151.153		77.698	109.229
	40.9643	17.429		101.012	107.034		99.9322	84.9706
	105.54	122.86		69.8619	183.407		51.8826	93.5332
	79.2905	154.43		100.061	166.684		80.3752	108.777
	153.945	56.3386		33.733	167.551		142.914	108.612
	143.891	162.343		81.474	94.8546		51.7867	65.483
	140.547	33.29		96.7759	196.497		127.997	60.5082
	134.888	64.2499		68.7702	55.4938		122.966	30.9443
	126.252	79.8772		81.7121	121.945		68.802	370.944
	148.366	258.526		106.622	166.292		187.072	44.5972
	75.5746	248.246		49.4298	159.014		202.949	47.5451
	62.495	84.5419		47.8172	139.941		224.184	47.9288
	86.0753	27.3395		51.624	66.2868		240.569	75.2637
	108.496	16.4109		51.2934	118.527		207.301	63.8479
	112.653	153.24		83.5143	90.1698		30.3715	31.0397
	178.648	113.751		58.4614	84.9517		133.939	67.0173
	69.1839	75.7851		114.9	77.3899		186.094	113.502
	163.332	37.2742		110.35	121.446		87.8416	84.577
	110.741	101.605		68.6644	72.7817		175.895	107.49
	92.5213	46.9488		56.6938	102.557		193.041	69.7055
	62.2335	52.6792		24.8803	159.978		88.7261	76.057
	140.942	198.382		151.719	75.4441		121.497	11.731
	147.544	106.134		102.807	134.28		190.743	23.9966
	74.9781	7.61258		91.6403	57.1515		130.397
	160.594	72.1517		106.291	112.557		72.2304
	121.742	22.8595		81.6388	81.5223		130.633
	98.7699	20.3451		58.6129	36.2514		91.7395
	170.237	39.9665		102.425	127.986		96.2492
	32.6821			49.3092	145.388		109.166
	58.296	76.4718		46.6887	93.5455		117.664
	135.875	204.521		60.3702	101.944	n =	103	96
	65.7976	37.1975		88.5924	132.791
	68.3882	78.7431		35.2241	96.0019		D'Agostino & Pearson test
	52.0591	117.281		104.182	156.762		p-value
	208.089	57.8512		77.1533	97.8188		0.0301	< 0.0001
	58.0251	105.067		58.3699	59.2039
	89.9033	92.8899		55.8666	125.214		Mann-Whitney test
	120.613	59.2922		101.899	180.645		p < 0.0001
	105.281	68.3465		42.5054	132.077
	133.582	119.352		107.082	122.277
	46.9898	120.166		79.0544	57.694
	51.5853	179.605		48.4947	87.5252
	54.1399	47.124		84.7297	46.6618
	38.6414	86.2948		45.1717	311.779
	33.3071	105.213		83.2515	77.3368
	72.015	91.2834		126.437	92.4527
	43.0349	103.212		79.1262	65.7431
	120.1	254.211		95.679	95.0639
	74.4306	43.1582			68.608
	80.2881	105.174			65.9024
	126.583	110.581			132.723
	88.4715	153.772			82.2268
	132.162	78.1687			69.0458
	80.9818	100.679			67.1697
	122.895	213.309		109.948	31.882
	81.2302	139.644		64.2576	27.2166
	180.482	244.636		26.1571	40.7744
	138.318	88.1931		87.6761	67.3046
	116.526	67.2564		77.706	59.832
	38.2706	49.016		48.8162	56.9775
	135.243	118.338		148.438	83.1297
	138.387	93.925		25.7418	183.532
	61.4869	39.7915		53.9926	59.6474
	79.4069	103.553		179.985	76.5674
	126.317	195.591		65.9066	105.437
	54.8537	113.081		32.6728	154.754
	43.7268	98.1063		58.3087	86.7252
	92.8868	110.638		49.2452	36.0577
	57.2209	43.4232		58.1566	70.7614
	90.0507	92.7709		84.0881	87.2181
	45.9786	67.8745		117.766	88.5977
	73.9561	231.496		53.4793	25.3417
	51.9011	30.0126		103.462	61.532
	139.413	25.6732		86.9444	21.2536
	119.199	69.0962		140.151	95.7635
	69.9948	126.447		185.592	77.022
	121.411	145.881		157.849	88.6916
	142.073	165.619		130.276	100.959
	108.874	58.4604		174.051	79.3368
	74.6771	76.3671		74.1552	41.8801
	84.5974	110.42		103.107	25.4415
	118.882	113.096		83.6551	49.057
	45.6225	100.684		137.791	129.362
	81.3655	100.733		63.9035	39.9672
	107.644	78.9903		93.9041	72.4381
	92.6265	171.467		53.7415	113.206
	74.5066	88.9988		83.0594	38.1451
	145.68	38.6231		39.7277	53.1116
	157.702	34.7633		51.1368	77.4161
	150.898	72.5616		69.1969	63.1435
	134.988	19.931		73.9112	17.0212
	51.6112	75.2727		69.1051	29.6576
	60.4721	124.422		55.5174	63.9817
	83.133	108.714		100.415	141.444
	114.964	88.2726		114.184	47.3901
	142.668	138.986		27.0517	149.256
	52.9969	83.376		37.1608	53.141
	70.5865	266.822		132.829	115.333
	153.632	143.719		62.3546	133.178
	42.2118	68.7515		53.8314	161.495
	41.6215	82.5893		32.2266	13.0868
	70.9751	42.1091		41.0078	20.7849
	97.0155	101.012		86.4542	72.9874
	130.65	69.8619		18.1053	52.5684
	110.244	100.061		65.714	33.4676
	111.857	33.733		42.4116	105.534
	193.348	81.474		24.9166	101.98
	134.484	96.7759		128.341	82.0226
	53.5364	68.7702		44.841	50.0868
	95.42	81.7121		62.0129	102.496
	108.7	106.622		69.9192	48.5601
	79.5419	49.4298		38.6297	56.4762
	104.069	47.8172		23.2156	54.3045
	79.5967	51.624		54.7116	115.699
	84.9738	51.2934		118.38	88.0721
	83.5	83.5143		56.5072	151.756
	113.397	58.4614		43.424	90.469
	50.7955	114.9		53.245	99.5909
	51.2218	110.35		26.9263	36.4341
	62.4007	68.6644		67.7312	72.8817
	110.013	56.6938		70.8491	173.05
	26.2264	24.8803		73.3005	31.9905
	28.5847	151.719		83.5116	95.6432
	100.812	102.807		66.2889	48.9118
	146.519	91.6403		66.0207	46.0439
	70.2766	106.291		34.2426	86.4667
	79.588	81.6388		34.6915	34.567
	31.379	58.6129		57.856	53.3021
	125.527	102.425		87.6325	43.9003
	54.0866	49.3092		78.2733	41.3723
	150.659	46.6887		38.7723	71.2676
	51.1293	60.3702		134.784	81.0367
	77.0425	88.5924		40.1682	81.3392
	155.796	35.2241		86.0461	121.872
	95.6649	104.182		44.4497	32.8761
	55.6964	77.1533		10.2947	58.0457
	103.925	58.3699		43.3193	86.2614
	45.0635	55.8666		80.8304	53.9225
	87.4285	101.899		83.316	44.931
	149.648	42.5054		97.04	110.555
	63.4399	107.082		75.1774	71.6557
	129.811	79.0544		121.218	65.2393
	66.6392	48.4947		33.7431	50.5124
	114.348	84.7297		52.2644	50.214
	186.866	45.1717		50.571	23.9575
	108.645	83.2515		28.2096	64.9242
	59.5844	126.437		109.246	82.5052
	104.25	79.1262		37.0986	107.912
	119.948	95.679		83.6027
	92.4391			55.1536
	124.088			121.484
	66.9065			44.4278
	123.123			91.6747
	93.039	109.948		67.8287
	173.567	64.2576		77.0278
	81.9179	26.1571		45.6463
	59.472	87.6761		32.2525
	111.612	77.706		54.6997
	70.633	48.8162	n =	225	221
	56.3751	148.438
	87.7169	25.7418		D'Agostino & Pearson test
	148.11	53.9926		p-value
	43.5776	179.985		< 0.0001	< 0.0001
	54.0523	65.9066
	120.04	32.6728		Mann-Whitney test
	49.3068	58.3087		p = 0.0056
	150.012	49.2452
	199.022	58.1566
	127.166	84.0881
	212.418	117.766
	148.734	53.4793
	53.5872	103.462
	137.114	86.9444
	158.695	140.151
	79.037	185.592
	142.765	157.849
	68.3927	130.276
	40.3472	174.051
	87.6712	74.1552
	36.8818	103.107
	41.8381	83.6551
	83.8161	137.791
	96.7174	63.9035
	81.3202	93.9041
	127.92	53.7415
	70.5208	83.0594
	75.467	39.7277
	173.95	51.1368
	56.5699	69.1969
	58.4599	73.9112
	88.4505	69.1051
	163.853	55.5174
	104.506	100.415
	9.4828	114.184
	196.735	27.0517
	102.475	37.1608
	216.587	132.829
	99.0494	62.3546
	142.797	53.8314
	45.9152	32.2266
	69.8614	41.0078
	72.5656	86.4542
	72.6687	18.1053
	64.6755	65.714
	119.913	42.4116
	60.4486	24.9166
	134.817	128.341
	169.631	44.841
	115.083	62.0129
	134.474	69.9192
	102.98	38.6297
	42.5928	23.2156
	126.314	54.7116
	17.6008	118.38
	18.9417	56.5072
	20.9578	43.424
	67.8554	53.245
	135.62	26.9263
	194.353	67.7312
	134.364	70.8491
	173.61	73.3005
	54.9227	83.5116
	61.4879	66.2889
	41.1486	66.0207
	35.1302	34.2426
	73.0611	34.6915
	53.0023	57.856
	94.0766	87.6325
	23.9788	78.2733
	29.5321	38.7723
	58.1807	134.784
	28.921	40.1682
	23.4983	86.0461
	27.6989	44.4497
	56.1022	10.2947
	41.0796	43.3193
	312.934	80.8304
	61.6223	83.316
	96.5266	97.04
	22.5866	75.1774
	51.8106	121.218
	144.87	33.7431
	22.6699	52.2644
	102.6	50.571
	47.2025	28.2096
	27.5344	109.246
	44.4829	37.0986
	76.3674	83.6027
	41.4056	55.1536
	55.9024	121.484
	33.0367	44.4278
	25.5556	91.6747
	47.5706	67.8287
n =	326	321
	D'Agostino & Pearson test
	p-value
	< 0.0001	< 0.0001
	Mann-Whitney test
	p < 0.0001
n =
