# Supplementary material for: Rho GTPase signaling and mDia facilitate endocytosis via presynaptic actin
Source: eLife journal article supplement (doi:10.7554/elife.92755), 2023-12-05
Supplement: fig2-figsupp1-data1 [file elife-92755-fig2-figsupp1-data1-v1.zip]

## Sheet: Figure 2 S1
	Figure 2 S1C
	SV/µm2 in shCTR
	Vehicle	TTX
	32.6821	79.0068
	58.296	152.002
	135.875	134.188
	65.7976	98.5963
	68.3882	102.03
	52.0591	70.253
	208.09	95.9422
	58.0251	151.778
	89.9033	92.9107
	120.613	120.022
	105.281	108.124
	133.582	95.2524
	46.9898	64.4777
	51.5853	94.6621
	54.1399	116.014
	38.6414	94.087
	33.3071	54.6999
	72.015	101.064
	43.0349	59.5343
	120.1	95.9584
	74.4306	85.8326
	80.2881	96.8562
	126.583	59.6998
	88.4715	142.747
	132.162	118.355
	80.9818	226.127
	122.895	133.909
	81.2302	83.9719
	180.483	152.548
	138.318	57.8113
	116.526	174.272
	38.2706	247.289
	135.243	98.8876
	138.387	115.524
	61.4869	65.6707
	79.4069	58.3654
	126.316	130.597
	54.8537	114.105
	43.7268	46.6167
	92.8868	112.375
	57.2209	104.022
	90.0507	190.676
	45.9786	109.714
	73.9561	200.859
	51.9011	136.756
	139.413	60.7892
	119.199	122.215
	69.9948	112.208
	121.411	146.21
	142.073	55.5611
	108.874	91.3381
	74.6771	74.2769
	84.5974	49.5343
	118.882	115.135
	45.6225	92.6727
	81.3655	143.517
	107.644	94.4328
	92.6265	47.9272
	74.5066	109.51
	145.68	145.057
	157.703	53.961
	150.898	135.202
	134.988	120.29
	51.6112	116.004
	60.4721	87.6943
	83.133	85.925
	114.964	107.037
	142.668	90.3574
	52.9969	137.21
	70.5865	77.8939
	153.632	51.5933
	42.2118	153.516
	41.6215	74.752
	70.9751	54.0794
	97.0155	109.594
	130.65	69.3101
	110.244	87.899
	111.857	135.014
	193.348	38.3681
	134.484	333.984
	53.5364	137.24
	95.42	140.382
	108.7	76.9425
	79.5419	97.6931
	104.069	152.251
	79.5967	76.7281
	84.9738	107.049
	83.5	131.032
	113.397	83.9244
	50.7955	133.465
	51.2218	268.329
	62.4007	155.266
	110.013	140.049
	26.2264	152.36
	28.5847	142.746
	100.812	142.318
	146.519	162.514
	70.2766
	79.588
	31.379
	125.527
	54.0866
	150.659
	51.1293
	77.0425
	155.796
	95.6649
	55.6964
	103.925
	45.0635
	87.4285
	149.648
	63.4399
	129.811
	66.6392
	114.348
	186.866
	108.645
	59.5844
	104.25
	119.948
	92.4391
	124.088
	66.9064
	123.122
	93.039	86.8993
	173.567	38.1139
	81.9179	75.9664
	59.472	118.895
	111.612	114.68
	70.633	67.9035
	56.3751	25.1716
	87.7169	100.24
	148.11	25.874
	43.5776	58.0024
	54.0523	163.791
	120.04	81.9562
	49.3068	38.139
	150.012	39.2503
	199.022	55.703
	127.166	87.019
	212.418	59.2456
	148.734	144.702
	53.5872	74.9031
	137.114	39.8841
	158.695	53.3897
	79.037	51.8364
	142.765	123.483
	68.3927	58.7626
	40.3472	163.585
	87.6712	98.8005
	36.8818	78.9647
	41.8381	72.5861
	83.8161	81.2551
	96.7174	142.001
	81.3202	142.618
	127.92	123.088
	70.5208	89.6302
	75.467	48.7964
	173.95	37.3709
	56.5699	193.679
	58.4599	75.8139
	88.4505	85.6139
	163.853	139.962
	104.506	39.4671
	9.4828	50.626
	196.735	113.5
	102.475	91.6807
	216.587	113.838
	99.0494	147.206
	142.797	76.3855
	45.9152	49.7407
	69.8614	17.916
	72.5656	144.434
	72.6687	49.2053
	64.6755	46.3149
	119.913	157.616
	60.4486	38.8061
	134.817	110.083
	169.631	64.2748
		61.6313
		120.447
		52.1463
		62.8499
		87.8055
		57.2152
		87.7992
		42.1663
		148.127
		79.9881
		99.1079
		22.465
		141.404
		83.6548
		34.515
		86.4449
		37.9681
		87.8888
		100.086
		28.8511
		121.527
		74.7758
		79.1317
		111.419
		95.8138
		63.4805
		56.589
		39.6959
		41.0039
		93.2044
		20.4929
		83.7784
		209.997
		38.3658
		147.445
		138.022
		24.5524
		70.9729
		68.8111
		101.19
		166.428
		184.606
		183.789
		40.488
		64.2858
		115.005
		85.1584
		27.0839
		89.6272
		107.052
		78.1805
		127.819
n =	180	204
	D'Agostino & Pearson test
	p-value
	< 0.0001	< 0.0001
	Mann-Whitney test
	p = 0.0655
