# Supplementary material for: Rho GTPase signaling and mDia facilitate endocytosis via presynaptic actin
Source: eLife journal article supplement (doi:10.7554/elife.92755), 2023-12-05
Supplement: fig3-data1 [file elife-92755-fig3-data1-v1.zip]

## Sheet: Figure 3
	Figure 3B					Figure 3D											Figure 3E					Figure 3H				Figure 3K
							relative intensity															presynaptic mDia1				presynaptic mDia1
	τ [s; Syph-pH; 40Hz5s]					distance [nm]	Bassoon			mDia1			Homer1				Gene/protein	Fold change [log2]	p-value [-log10]			DMSO	Dynasore			WT	K44A
	shCTRmiR	shmDia1miR	shmDia1miR + mDia1-WT	shmDia1miR + mDia1-ΔN		416.262	0.0919124	0.125538	0.166582	0.253029	0.362893	0.346928	0.0820973	0.109194	0.0989963		mDia1	7.49371	3.03687			40.2061	68.7487			161.63	59.6011
	22.4	34.7	17.25	43.92		397.341	0.104727	0.109477	0.164539	0.267954	0.354891	0.34617	0.0858102	0.108037	0.0938437		Igkv9-124	4.57968	2.6493			51.3767	88.3383			97.097	188.905
	25.62	35.36	21.72	37.74		378.42	0.0995477	0.111444	0.165574	0.242049	0.343069	0.329328	0.09329	0.119379	0.0960379		Igkv4-58	-1.26146	0.115788			36.1403	43.0945			62.8694	150.696
	20.95	27.91	21.49	32.58		359.499	0.0987713	0.11281	0.161674	0.251655	0.341707	0.392255	0.103306	0.122893	0.0889224		Igkv5-39	-1.46837	0.0913234			32.759	82.1233			138.99	190.213
	20.77	26.53	19.07	28.69		340.578	0.10916	0.11284	0.169622	0.278151	0.3449	0.38598	0.109305	0.117465	0.0906559		Ighg2b;Igh-3	-1.32598	0.0210233			28.5563	74.334			149.448	268.116
	19.37	27.34	20.63	29.3		321.657	0.103071	0.11977	0.16398	0.285769	0.365197	0.387285	0.104954	0.133546	0.0907347		Ighg1	2.33305	1.61516			39.7406	156.334			123.362	134.236
						302.736	0.113118	0.128475	0.165621	0.308337	0.390015	0.4182	0.0983707	0.134752	0.0905382		Ighg3	-1.07441	0.157512			49.7613	127.737			176.605	140.951
						283.815	0.11461	0.117723	0.174093	0.309087	0.445149	0.421155	0.108213	0.139129	0.0894628		Ighm	0.850456	0.534952			82.1917	87.5991			125.561	137.742
	one-way ANOVA with Tukey's post-test					264.894	0.126534	0.124339	0.179674	0.297559	0.440625	0.41024	0.109798	0.13143	0.0968226		Ighv6-3	-0.132199	0.266599			41.0548	92.6916			149.092	242.267
	p-value					245.973	0.12273	0.137144	0.198097	0.304177	0.474288	0.429812	0.11507	0.124929	0.094563		Ighv1-81	-0.420537	0.184614			48.3924	68.8856			146.537	122.589
	0.0226	shCTRmiR vs. shmDia1miR				227.052	0.136454	0.13035	0.202175	0.341976	0.487424	0.485697	0.113038	0.126017	0.0948972		Slc12a5	1.70182	1.0609			222.454	107.668			179.992	82.9543
	0.9017	shCTRmiR vs. shmDia1miR + mDia1-WT				208.131	0.143929	0.137906	0.209261	0.343034	0.454973	0.458215	0.118099	0.134997	0.0975494		Clasp1	-0.0419788	0.285033			43.0398	40.5894			174.644	193.243
	0.001	shCTRmiR vs. shmDia1miR + mDia1-ΔN				189.21	0.153955	0.133384	0.248362	0.351094	0.461094	0.444299	0.130407	0.142421	0.104177		Abi2	0.579353	0.46863			55.4151	145.793			87.7676	93.6505
	0.0057	shmDia1miR vs. shmDia1miR + mDia1-WT				170.289	0.188993	0.141412	0.270548	0.370223	0.491129	0.465299	0.133797	0.136937	0.106667		Mag	1.12908	0.915857			79.2348	155.923			93.7099	317.853
	0.4284	shmDia1miR vs. shmDia1miR + mDia1-ΔN				151.368	0.225052	0.16521	0.306829	0.398204	0.552547	0.542468	0.144399	0.152055	0.123849		Kif1a	1.16358	1.18597			26.366	48.0228			170.781	175.357
	0.0003	shmDia1miR + mDia1-WT vs. shmDia1miR + mDia1-ΔN				132.447	0.242265	0.189008	0.350295	0.415054	0.548602	0.579217	0.15033	0.163007	0.124996		Nucks1	0	-4.34e-08			92.4862	122.85			58.1275	144.338
						113.526	0.269452	0.221278	0.384854	0.407558	0.534136	0.600869	0.165636	0.162555	0.140259		Tuba4a	0.870929	0.543126			53.9777	51.541			94.1853	223.846
						94.605	0.31496	0.276321	0.434966	0.535227	0.566567	0.698003	0.187228	0.178176	0.161372		Mapt	1.38841	1.0751			85.4635	125.191			140.951	155.926
						75.684	0.38463	0.33288	0.477752	0.574397	0.666152	0.69837	0.208435	0.188334	0.187755		Gapdh;Gm3839;Gm7293	1.13726	0.843856			47.9269	108.092			97.9289	64.2956
						56.763	0.498948	0.459023	0.588045	0.675819	0.693338	0.730291	0.247198	0.215322	0.210706		Gm8797;Uba52;Kxd1;Ubc;Ubb;Rps27a;Gm7808	-0.26742	0.243039			35.4558	148.394			95.4926	96.3245
						37.842	0.63601	0.609812	0.727143	0.819902	0.779233	0.806231	0.280287	0.22488	0.261213		Camkv	-0.375318	0.234804			42.9987	84.2452			70.6538	159.253
						18.921	0.827822	0.787786	0.85657	0.954586	0.906821	0.891142	0.327733	0.267149	0.310367		Atp6v1h	0.527315	0.448399			30.9793	152.09			108.031	71.3669
						0	1	1	1	1	0.962499	0.944313	0.403617	0.350737	0.392666		Prkar2a	0.56472	0.459435			66.2982	143.466				150.756
						-18.921	0.849486	0.846623	0.86686	0.955816	1	1	0.465293	0.412137	0.473376		Ighg2c	-2.51227	0.0249585			27.379	100.878				121.639
						-37.842	0.690851	0.637497	0.734205	0.948823	0.975421	0.9726	0.571443	0.509667	0.589398		Igkv4-57	-2.49045	0.0201693				98.6055				105.951
						-56.763	0.554295	0.489222	0.609079	0.939607	0.855473	0.843884	0.700198	0.661028	0.704214		Igkv2-137	0.0801799	0.318418				85.7921				159.907
						-75.684	0.444217	0.398489	0.48532	0.858498	0.816155	0.768521	0.814507	0.802949	0.813886		Igkv1-135;Igkv1-133	-1.16788	0.0979515				74.1834				167.454
						-94.605	0.370972	0.324911	0.402737	0.735319	0.780747	0.747409	0.919947	0.906453	0.920231		Amphiphysin	2.23743	1.36853				50.8565			62.4534	81.7065
						-113.526	0.329778	0.254157	0.330734	0.690653	0.698692	0.618128	0.992971	1	0.990307		Aldh2	1.26304	0.982611				71.9657			103.633	45.3397
						-132.447	0.270685	0.204501	0.285666	0.629117	0.674885	0.61175	1	0.972279	1		Rufy3	0.625452	1.53016				90.8846			81.4688	111.18
						-151.368	0.2179	0.167746	0.251043	0.600602	0.608282	0.611568	0.977809	0.92462	0.988217		Lgi1	1.07863	0.657283				65.8191			59.7794	102.207
						-170.289	0.185308	0.143154	0.240149	0.564933	0.582339	0.592956	0.946114	0.876495	0.930241		Qdpr	0.738976	0.871985				76.5243			117.004	108.447
						-189.21	0.159174	0.14981	0.214684	0.546733	0.613393	0.568364	0.85096	0.768317	0.85368		Nras;Hras;Kras	1.28839	1.39828				93.9784			40.1818	203.167
						-208.131	0.146781	0.147492	0.204799	0.488213	0.491995	0.517058	0.756268	0.677577	0.744434		Dclk1	1.63225	1.03007				74.2382			85.0341	81.4688
						-227.052	0.141376	0.123596	0.183498	0.457	0.463986	0.491079	0.678902	0.567106	0.643665		Atp1a3	1.5869	0.857133				57.0168			120.51	207.98
						-245.973	0.129361	0.130788	0.179943	0.406119	0.461972	0.468682	0.604817	0.482885	0.556796		Sep 11	1.35614	0.616835				43.4505			109.1	54.1877
						-264.894	0.119914	0.128835	0.17559	0.406519	0.504688	0.484727	0.519799	0.409938	0.470982		Dynamin1	2.62683	1.0042				39.8364			47.0213	69.4654
						-283.815	0.110782	0.125199	0.15902	0.389065	0.515839	0.471553	0.475899	0.37388	0.390765		Hmgb1	1.65436	1.12975				171.666			70.7132	68.2175
						-302.736	0.0985828	0.134927	0.150369	0.36514	0.516107	0.479051	0.418676	0.323992	0.336105		Ptprz1	0.938815	0.649115				42.4101			71.8423	171.435
						-321.657	0.0963868	0.125807	0.14876	0.323697	0.478359	0.482677	0.364038	0.292897	0.293486		Eif4g3	1.65742	1.01455				130.694			69.5248	105.654
						-340.578	0.102177	0.124523	0.149009	0.322742	0.417492	0.454406	0.317016	0.27172	0.263309		Igsf8	0.537409	0.42361				147.436			77.5469	167.81
						n =	97	56	82	97	56	82	97	56	82		Cacnb1	0.525592	0.475908				145.793			61.8592	109.279
							235			235			235				Dbn1	0	-4.34e-08				145.793			75.3482	114.567
																	Madd	0.633905	1.3958				113.335			125.977	134.949
																	Ndufa12	0.85924	0.669896				135.718			38.1851	165.017
																	Kctd12	0.393019	0.356825				175.363			49.2734	187.36
																	Syt2	0.00550079	0.302693				130.297			86.2226	288.082
																	Fasn	2.98835	1.95024				129.106			43.866	148.141
																	Smarca2	-0.0955289	0.272806				204.932				132.691
																	Sirt2	1.8286	0.837679				188.641				142.971
																	Cd81	1.32276	0.674414				57.2358				164.958
																		-3.77584	0.0045492				121.234		n =	43	51
																		-0.818646	0.115688			37.6324	86.1206
																		-0.794942	0.150901			78.6325	83.6428			D'Agostino & Pearson test
																	Vdac3	0.505484	0.472732			93.0612	67.0101			p-value
																	Ldha	1.44602	0.900039			59.344	126.669			0.1555	0.0378
																	Bag6	0.558298	0.727044			41.9857	169.202
																	Gphn	1.34293	0.993416			62.8074	189.6			One sample Wilcoxon test
																	Actn1	0.812863	0.633723			62.9169	59.7683			p < 0.0001
																	Lasp1	0.200009	0.359788			48.4882	58.0572
																	Sep 09	1.70203	1.54511			55.7163	57.756
																	Gstm1;Gstm7;Gstm2	2.51331	2.37107			63.6014	49.5834
																	Gpm6b	0.390423	0.387428			50.5279	31.8281
																	L1cam	1.88186	1.07313			38.0568	46.1473
																	Psmc3	0	-4.34e-08			55.9079	75.6756
																	Arhgap1	0.982313	0.658929			43.8064	48.2966
																	Dgkz	1.0898	0.977655			60.4665	65.0388
																	Atp2b3	1.06006	0.774637			51.6231	63.0812
																	Rap1gap	0.469064	0.43335			204.658	143.192
																	Endophilin-A1	1.88442	0.64722			90.3507	53.7997
																	Capzb	1.74424	1.16609			24.3399	118.387
																	Plch2	0.381793	0.544742			90.2549	100.399
																	Map1a	2.22235	1.38255			72.2532	110.556
																	Nckap1	1.47046	1.02708			67.5714	98.2085
																	Epb4.1l1;Epb41l1	1.84218	1.52845			62.1229	103.438
																	Sh3glb2	0.889963	0.655708			66.4762	121.371
																	Set	2.12322	1.03599			31.9376	99.4268
																	Sptan1	2.11571	1.45747			65.8465	93.7867
																	Hbbt1;Hbb-bs	2.31954	1.11576			91.5964	107.23
																	Vamp2;Vamp3	1.77881	0.800024			64.2311	52.6498
																	Dmxl2	1.26172	1.19328			70.0218	129.585
																	Srcin1	-0.0314026	0.286237			128.996	48.3513
																	Sep 08	2.04393	0.964094				66.8869
																	Vps13d	0.190928	0.520512				65.0388
																	Hnrnpk	1.55496	0.968404				90.1453
																	Dip2c	1.37962	1.16096				87.4622
																	Tnik	0.981793	1.25437				82.2739
																	Max	0.565023	1.33326				98.6465
																	Abi1	1.99364	1.07337				71.0622
																	Vamp1	-0.190715	0.233202				49.4602
																	Ndufb10	1.42036	0.701838				68.8992
																	Ndufv1	1.08113	0.884428				89.6799
																	Adam22	1.79294	0.856393				57.7834
																	Gm9755;Tufm	1.66943	0.889719				57.7834
																	Ndufs2	1.01666	0.72316				69.4468
																	Mapre2	1.6332	0.749365				174.13
																	Atp1a2	1.82876	1.06555			84.3684	142.781
																	Cdc42bpa	2.23488	1.61683			244.631	310.067
																	Cdh2	1.49669	1.35412			151.816	300.348
																	Dync1i1	0.868831	0.848218			119.961	280.361
																	Stmn1	0.508972	0.480051			172.762	396.995
																	Dlg1	1.27681	0.722994			106.162	288.575
																	Napg	1.21189	0.645249			101.083	165.917
																	Tpm3;Tpm3-rs7	0.875928	1.00897			108.818	278.171
																	Dip2a	0.826074	0.606462			259.142	254.899
																	Gls	1.07601	0.724802			208.491	252.845
																	Stx1a	1.51296	0.851224			235.733	277.486
																	Kcnab2	0	-4.34e-08			358.802	134.143
																	Psd3	1.41938	1.13098			174.541	155.923
																	Dnm1l	0.881379	0.747467			91.8292	172.488
																	Prrt2	0.247053	0.36793			122.398	183.576
																	Slc25a22	0.486517	0.520082			140.044	551.139
																	Dpysl3	2.08577	1.05059			96.8806	143.055
																	Dpp6	1.01983	0.930807			177.69	108.01
																	Acot7	0.176047	0.363881			389.192	179.196
																	Usp14	0	-4.34e-08			164.411	168.107
																	Gm10036;Rpl11;Gm5093	0	-4.34e-08			161.125	210.955
																	Kif21a	0.517902	0.624517			142.645	262.565
																	Hsph1	1.04768	0.831949			132.857	268.314
																	Sep 07	2.14867	0.925296			89.9537	174.404
																	Dctn1	0.683217	0.538856			89.2966	417.94
																	Rab11b;Rab11a	1.92882	1.19983			100.618	340.868
																	Sep 02	1.32422	0.816185			168.381	272.01
																	Dsp	2.81837	1.65939			193.433	442.308
																	Eif4a2;Eif4a1	1.17604	0.948708			116.908	236.691
																	Rap1gds1	0.996447	0.730344			79.0158	165.095
																	Ogdhl	1.04629	0.669113			101.015	242.03
																	Synaptojanin1	0.922185	0.525312			153.733	627.116
																	Cadps2	0.282323	0.427803			112.774	154.144
																	Clasp2	0.893125	0.894543			60.179	289.533
																	Snap91	1.88851	1.18001			225.877	301.99
																	Inf2	-0.287552	0.216475			147.162	290.765
																	Srgap3	1.74568	1.01831			133.514	603.844
																	Pcx;Pc	1.15389	0.734812			87.8729	166.875
																	Cyb5r3	1.00275	0.713054				293.366
																	Cops4	1.35178	1.16365		n =	92	135
																	Mbp	0.976212	0.834082
																	Gm9493;Rps7	0	-4.34e-08			D'Agostino & Pearson test
																	Add1	1.28302	1.12799			p-value
																	Ahcyl2	0.89452	0.992509			< 0.0001	< 0.0001
																	Atp2b2	1.61588	0.800512
																	Pip5k1c	1.26744	1.12438			One sample Wilcoxon test
																	Anxa6	0	-4.34e-08			p = 0.0001
																	Csnk2b	0.403212	0.556039
																	Cadm2	2.12524	0.988069
																	Mink1;Map4k4	-0.26386	0.218646
																	Gm10250;Atp5h	1.22023	0.573791
																	Atp2b1	1.15457	0.700079
																	Pak1	1.18029	0.944631
																	Slc25a3	0.408176	0.364885
																	Cpsf6	0.870874	0.781012
																	Ap2b1	1.62536	1.28646
																	Evi5l	1.38335	1.25333
																	Gnb1	2.23328	0.672745
																	Tcof1	0.455233	0.968322
																	Opa1	0.758337	0.535254
																	Srsf1	0.504518	0.639696
																	Tpi1	1.75989	1.1428
																	Atp6v0a1	1.56296	0.910284
																	Bin1	0.904652	0.582635
																	Dpysl2	1.68947	0.924604
																	Pten	0	-4.34e-08
																	Stxbp1	1.8814	0.851937
																	Prdx6	0.751981	0.700079
																	Flot1	1.41303	0.666974
																	Phb2	0.803897	0.518261
																	Ncam2	0.846774	0.546523
																	Purb	1.73523	1.00116
																	Anp32a;Anp32c	2.22912	1.03451
																	Crym	0.857159	0.848144
																	Asna1	0.214089	0.390066
																	Cntnap1	0	-4.34e-08
																	Pgrmc1	1.40206	0.850615
																	Snca	2.20347	1.73791
																	Atp2a2	0.979207	1.02158
																	Supt5h	1.73486	0.9483
																	Pip4k2a	1.27902	0.922538
																	Eif3d	0	-4.34e-08
																	Epb41l2	0.748329	1.64435
																	Cfdp1	1.36194	0.75152
																	Bsn	1.22778	0.579958
																	Syn1	1.87928	0.979701
																	Mtco2	0.427801	0.381696
																	Ca2;Car2	1.6368	1.14056
																		-1.74802	0.0720011
																		0.718054	0.449624
																	Igkv3-2	-2.95657	0.030255
																		1.00447	0.531825
																	Thy1	-1.41497	0.0791224
																	Igkc	1.1641	0.678734
																	Ighg;Igh-1a	-5.15561	0.00132189
																	Aldoc	1.17957	0.645758
																	Aldoa;Aldoart1	2.43642	0.98626
																	Prkaca	0.99263	0.693561
																	Got1	1.74056	1.05933
																	Got2	2.96101	1.05984
																	Gpi	1.66723	1.00854
																	Gap43	0.840251	0.494418
																	Anxa2	1.31179	1.27542
																	Alb	0.511938	0.507231
																	Hsp90aa1	2.26358	1.23366
																	Hsp90b1	2.17185	1.1964
																	Apoe	0.286609	0.395996
																	Sod1	0	-4.34e-08
																	Mdh2	2.0817	0.747912
																	Nefl	0.179824	0.388866
																	Gnai2	0.935123	0.659299
																	Ncl	1.71835	0.830978
																	Pgk1	2.26542	0.999625
																	Sod2	0.678481	0.468512
																	Eef1a1	0.584583	0.411052
																	Slc3a2	0.723719	0.49053
																	Sub1	1.15791	1.05997
																	Hsp90ab1	1.40512	1.05683
																	Camk2a	1.54796	0.668176
																	Itpr1	2.13887	1.36121
																	Tcp1	1.03366	1.09276
																	Cox5a	0.370429	0.419493
																	Cntn1	0.920081	0.4741
																	Ncam1	1.81482	0.696314
																	Atp1b1	1.12056	0.504402
																	Rps16	0	-4.34e-08
																	Mdh1	1.07767	0.684454
																	Rpsa	0.570379	0.612543
																	Atp1b2	1.91658	0.758433
																	Rplp0	0.37168	0.48679
																	Map1b	2.20558	1.09174
																	Glul	1.03396	0.47252
																	Ldhb	1.98549	1.14391
																	Cnp	2.2476	0.984786
																	Eno1	1.61784	0.758831
																	Eno2	3.0338	1.24837
																	Ap2a1	2.00174	1.36264
																	Ap2a2	2.17813	1.34937
																	Hk1	1.00805	0.62111
																	Ppia	2.9488	1.1066
																	Cfl1	0.552177	0.427463
																	Gnao1	2.49777	0.854087
																	Cox4i1	1.49904	0.579745
																	Hspa5	1.37852	0.957736
																	Map2	1.57543	1.05425
																	Gnaq	1.73916	0.771491
																	Eif3a	0.786261	0.671383
																	Cbx3	0	-4.34e-08
																	U2af2	0.513761	0.492801
																	Glud1	1.55246	0.61052
																	Marcks	1.05834	0.693392
																	Gna13	1.37429	1.06541
																	Pdia3	1.88938	0.997853
																	Camk2b	0.245801	0.37773
																	Napb	1.27414	0.624794
																	Kif5c;Kif5a	1.04057	1.30882
																	Ckmt1	1.72376	1.08725
																	Prkar2b	1.64998	2.08309
																	Slc6a1	0.852712	0.521858
																	Map2k1	1.1926	0.886211
																	Slc2a3	0.260816	0.371202
																	Rab5c	0	-4.34e-08
																	Pdha1	1.63279	0.735623
																	Canx	1.75961	1.07952
																	Gpm6a	1.45277	0.833275
																	Gnl1	1.07006	0.605096
																	Hspa9	1.35456	0.789013
																	Cap1	0.894739	0.711352
																	Tkt	1.47991	0.97772
																	Pura	1.27239	0.628831
																	Cct8	1.80376	1.11224
																	Slc1a2	1.31386	0.509285
																	Hist1h1e	0.12425	0.46301
																	Hist1h1d;Hist1h1c	0.216323	0.416336
																	Syt1	1.85148	0.827545
																	Nsf	1.27978	0.737124
																	Ina	-0.147813	0.243012
																	Rph3a	0.813533	0.747316
																	Capza2	2.11976	1.12745
																	Pfkm	0	-4.34e-08
																	Anxa5	1.79625	0.85628
																	Lmna	1.03371	1.28377
																	Hspa4l	1.40417	0.959296
																	Cbr1	1.0107	0.807113
																	Slc25a4	1.51079	0.519905
																	Psma2	0.764575	0.970872
																	Gdi1	1.63207	0.9885
																	Atp6v1a	2.56818	1.12102
																	Atp6v1e1	1.64379	0.993708
																	Rab7a	1.97964	0.994461
																	Hdgf	0.16489	0.358873
																	Atp6v0d1	1.83207	0.707779
																	Slc25a5	0.698104	0.420994
																	Pkm	1.56334	0.788257
																	Usp5	1.26048	1.00491
																	Atp5b	1.41602	0.777006
																	Slc1a3	0.497391	0.488942
																	Eef2	1.31813	0.809954
																	Arpc4	1.44535	1.10844
																	Plp1	0.2173	0.33894
																	Eif3e	-0.27044	0.0659557
																	Ppfia3	1.01603	1.21244
																	Pdxp	0	-4.34e-08
																	Actin	1.43471	0.855184
																	Rps20	1.12204	1.47469
																	Snap25	1.87324	1.02982
																	Dnajc5	1.16448	0.785955
																	Actr2	1.16757	0.929895
																	Stx1b	1.99805	1.02698
																	Abat	2.31851	1.53494
																	Ywhag	2.04134	1.1063
																	Ppp1cb	1.3488	1.12878
																	Calm1	2.45191	1.00454
																	Ube2h	1.1708	0.724885
																	Ywhae	2.57112	1.13039
																	Vsnl1	0.845862	0.752143
																	Atp6v1b2	1.55047	0.773601
																	Rab1;Rab1A	2.6697	1.47243
																	Cycs	2.44202	1.03365
																	Rps3	0.28717	0.406836
																	Rac1	1.18185	1.04789
																	Rab3a	2.15899	0.920043
																	Hspa8	1.4182	0.786903
																	Hspd1	1.56762	0.656611
																	Mapk1	1.41527	0.95698
																	Ywhaz	2.39345	0.976552
																	Rala	1.1709	0.789492
																	Rps10	0	-4.34e-08
																	Ppp3ca	1.69613	1.11603
																	Phb	0.0821158	0.323727
																	Gnb2l1	1.02788	0.898248
																	Ywhaq	2.07957	1.05421
																	Tuba1a;Tuba3a	1.28249	0.778455
																	Tubb4b	1.48663	0.848284
																	Prkcb	0.873377	0.670397
																	Ywhah	1.98754	0.832483
																	Kpnb1	1.05866	0.885475
																	Pebp1	1.97634	1.01269
																	Hnrnph2;Hnrnph1	0.261981	0.388719
																	Usp9x	1.2459	1.69373
																	Idh3g	0.629061	0.624294
																	Slc9a3r1	1.58222	1.43627
																	Naca	1.37645	0.67369
																	Cct7	0.490495	0.501205
																	Cct2	1.0485	0.778001
																	Cct5	1.75429	1.02041
																	Cct6a	1.10645	0.874802
																	Srsf3;Gm12355	-0.493036	0.171663
																	Nptn	0.883242	0.569415
																	Pkp1	2.32998	1.20012
																	Fh	2.00503	0.881699
																	C1qa	-1.24734	0.137376
																	Tubb5	1.9401	0.844714
																	Prdx5	1.97639	0.836201
																	Vcp	1.46378	1.02799
																	Uba1	1.51227	0.85794
																	C1qc	-1.61582	0.103621
																	Jup	2.25246	1.58182
																	Atp5a1	1.66225	0.775052
																	Ckb	2.49868	0.76912
																	Atp5i;Atp5k	1.22216	0.717331
																	6430548M08Rik;Kiaa0513	2.0044	1.19573
																	Rogdi	0.696671	0.84396
																	Gtf2f1	0.274313	0.503348
																	Pdia6	0.489995	0.471961
																	Srsf6	0	-4.34e-08
																	Hspa4	0.0579332	0.32449
																	Ndufv3	0.505913	0.462231
																	Trim21	-0.242002	0.233577
																	Ube2z	0.314487	0.409391
																	Puf60	1.77722	0.989699
																	MyoIIB	1.11927	0.862223
																	Aak1	1.5748	1.06885
																	Erc2	-0.0264263	0.288953
																	Pdap1	0.599211	0.508537
																	Ppp1r7	1.2222	1.03835
																	Gprin1	0.414637	0.53951
																	Oxr1	1.07045	1.00991
																	Prkca	0	-4.34e-08
																	Srsf4	0.0914097	0.34601
																	Taok1	0.146943	0.384192
																	Acsl6	1.3575	1.07006
																	Cyfip2	1.30064	0.963792
																	Flot2	0.237223	0.36751
																	Clint1	0.781403	0.595354
																	Cltc	1.34409	0.713414
																	Fam169a	0	-4.34e-08
																	Ogdh	1.74156	0.944374
																	Csnk2a1	0.9282	0.705894
																	Ppp1r1b	0.237925	0.370605
																	Stip1	2.20275	1.44015
																	Eps15l1	0.718632	0.849319
																	Vdac1	2.06034	0.702485
																	Mapre1	1.17618	0.788269
																	Prdx2	0.979479	0.561862
																	Gdi2	1.35729	1.20701
																	Pacsin1	2.61961	1.13932
																	Cbx5	0.709215	0.772902
																	Phgdh	1.4168	0.918857
																	Srsf2	0	-4.34e-08
																	Sptbn1	2.28614	1.21003
																	Trim28	0	-4.34e-08
																	Dbnl	1.28214	0.953236
																	Ndrg1	1.74584	1.10323
																	Ppp3r1	1.98087	1.16362
																	Syn2	1.24248	1.07167
																	Gpd2	1.39681	0.605738
																	Sptbn2	1.23117	1.15088
																	Snx1	1.11753	0.813252
																	Crmp1	1.49847	1.00463
																	Sirpa	0.750305	0.57571
																	Caskin1	0.116364	0.339189
																	Mapre3	1.71795	0.838231
																	Fam21	1.30774	0.998997
																	Ube2o	0.523263	0.645206
																	Taok2	0	-4.34e-08
																	Cand1	1.53152	1.1836
																	Larp1	0	-4.34e-08
																	Eif2s1	0.484748	0.486032
																	Cspg5	0.50234	0.470487
																	Ppp2r1a	1.29586	0.964952
																	Mtch2	1.13855	1.0125
																	Tpr	0.588104	0.791713
																	Cyfip1	0.872914	0.77626
																	Tubb2a	1.03628	0.643652
																	Dek	0	-4.34e-08
																	Tppp	0.994504	0.536767
																	Map6	2.05093	1.10064
																	Cdc42bpb	1.39762	1.21409
																	Ahcyl1	1.34132	0.989726
																	Cadps	2.06821	1.67308
																	Dnajc6	2.19652	1.75391
																	Pelo	1.57251	1.26959
																	Nfasc	1.22816	0.853373
																	Nrcam	0.668346	0.72654
																	Necab1	0	-4.34e-08
																	Eif4b	-0.845109	0.0546545
																	Aars	0.930632	0.865709
																	Slc25a12	0.634336	0.441266
																	Atcay	0.43441	0.457039
																	Rcc2	1.26847	0.74359
																	Pdhx	1.56892	0.995682
																	Srsf7	0	-4.34e-08
																	Dlat	0.982487	0.540575
																	Hadha	1.91754	0.784116
																	Sfxn5	1.12218	0.8034
																	Ndrg4	1.12694	0.740932
																	Ppme1	1.27355	0.765538
																	Aldh5a1	0.437553	0.441776
																	Ptges2	1.86147	1.57362
																	Vps13c	0.960483	0.575613
																	Tnr	1.99657	0.767578
																	Tmx4	0.215971	0.359991
																	Exog	0	-4.34e-08
																	Atp5c1	1.41187	0.571333
																	Pfkp	0.420129	0.410109
																	Efhd2	1.56953	1.43348
																	Ank2	1.18918	0.692228
																	Immt	0.43734	0.437563
																	Txnl1	0.493784	0.482832
																	Pcdh1	-0.00592105	0.299196
																	Eif2b5	-0.578041	0.147662
																	Pygb	1.18077	0.937497
																	Eif3b	0.669338	0.996308
																	Scamp1	1.55789	1.06258
																	Rtn1	0.960094	0.582679
																	Hspa12a	0.968646	0.499169
																	Pdxk	1.94199	1.45207
																	Cc2d1a	0.479405	0.749073
																	Pacs1	1.21027	0.859177
																	Sdha	1.35261	0.870321
																	Matr3	0.128759	0.361823
																	Appl1	1.44025	1.00936
																	Acat1	1.14794	0.952888
																	Eif3l	0.792287	1.2211
																	Gtf2f2	1.52255	0.944619
																	Eif3c	0.700485	0.993839
																	Dync1li1	1.04399	0.8106
																	Actr1b	1.49075	0.919023
																	Usp15	0.789544	1.01611
																	Wasf1	0.700986	0.583588
																	Cops8	0	-4.34e-08
																	Sgip1	1.12117	1.23807
																	Atp1a1	1.67691	0.739825
																	Wasf3	1.06927	0.833873
																	Rab14	1.77776	0.873175
																	Sfxn3	1.03588	0.554436
																	Idh3b	0.745323	0.665319
																	haemaglobin alpha 2;Hba	1.97369	0.710639
																	Ndufs1	0.766723	0.521622
																	Eif3h	0.0774288	0.348859
																	Pip4k2c	-0.181215	0.17192
																	Basp1	2.06474	0.711651
																	Sncb	1.81022	0.702091
																	Wdr7	0.382262	0.926911
																	Hnrnpll	1.84665	1.27683
																	Fam49b	1.27619	1.00573
																	Hadhb	1.07866	0.861888
																	Aco2	2.51048	1.19328
																	Dctn2	1.53936	0.883088
																	Ndufa10	1.06395	0.621712
																	Etfa	2.00828	0.770731
																	Srrt	0	-4.34e-08
																	Hsd17b10	0.596086	0.497258
																	Rtn4	2.11672	1.0114
																	Arhgdia	0	-4.34e-08
																	Acsbg1	1.73339	1.37102
																	Cox6c	0.20349	0.351684
																	Ndufa2	1.08401	0.701579
																	Gmfb	0.230405	0.370987
																	Rwdd1	-0.0685158	0.271201
																	Atp5f1	1.20556	0.569253
																	Ywhab	2.24462	0.959859
																	Cyb5b	0.839578	0.666929
																	Cacybp	0.367318	0.548173
																	Uqcrc1	1.06261	0.547591
																	Nsfl1c	1.21478	0.705707
																	Cs;Csl	1.9007	0.780649
																	Tomm70a	2.22405	1.50162
																	Rps19	-0.0375252	0.284305
																	Pdhb	0.987539	0.557881
																	Acbd6	0.511401	0.651635
																	Sarnp	1.01591	0.856517
																	Dlst	1.72877	0.678833
																	Ttpal	2.11757	0.869323
																	Tubb4a	0.0455983	0.315379
																	Ndufv2	0.883506	0.582968
																	Idh3a	2.28531	0.849416
																	Chmp4b	1.74812	1.06812
																	Eef1g	1.13807	0.907722
																	Napa	1.83957	1.03305
																	Atp5o	0.724761	0.440488
																	Btbd17	0.292849	0.417916
																	Uqcrc2	0.514238	0.376562
																	Pgam1	1.94561	1.0183
																	Ppp1r12a	0.305415	0.573047
																	Eif3f	0.515301	0.441952
																	Ndufs3	0.316215	0.376072
																	Dtd1	1.0691	0.626113
																	Vps35	1.75241	1.11981
																	Tubb3	1.27037	0.847058
																	Rtn3	0.967695	0.816508
																	Anp32b	1.22052	0.780955
																	Dync1h1	2.41472	1.10395
																	Akr1a1	0.557155	0.513311
																	Sv2a	0.785819	0.567724
																	Cend1	1.20304	0.590327
																	Tmod2	1.36755	1.01833
																	Ap3b2	1.95273	1.21544
																	Hdgfrp3	0.944746	0.590605
																	Drg2	1.35468	0.829296
																	Ehd3	1.69563	0.971369
																	Macf1	2.23474	1.21001
																	Add3	0.817179	1.06875
																	Add2	1.39392	0.853793
																	Ndrg3	1.14254	1.12453
																	Ndrg2	1.93409	1.11523
																	Pclo	0.5029	0.432681
																	Eif3i	0.973558	1.02667
																	Smap;1110004F10Rik	0	-4.34e-08
																	Uchl1	0.854901	0.604287
																	Gda	1.08237	0.718689
																	Sep 06	2.0234	0.926824
																	Atp6v1g2	-0.334636	0.20556
																	Suclg1	1.38778	1.00185
																	Mpp2	1.35967	1.06895
																	Epb41l3	0.747478	0.823459
																	Pacsin2	1.81275	1.93379
																	Ncdn	0.973761	0.618133
																	Clip2	1.7048	1.35348
																	Palm	0.570618	0.557412
																	Plcb1	1.45115	1.25777
																	Atp6v1c1	1.00432	0.908082
																	Sep 03	1.73901	0.798032
																	Letm1	1.22813	0.613471
																	Sucla2	0.694752	0.537326
																	Sep 05	2.28033	0.936584
																	Arfgap1	1.67288	1.32902
