# Supplementary material for: Rho GTPase signaling and mDia facilitate endocytosis via presynaptic actin
Source: eLife journal article supplement (doi:10.7554/elife.92755), 2023-12-05
Supplement: fig3-figsupp1-data4 [file elife-92755-fig3-figsupp1-data4-v1.zip]

## Sheet: Figure 3 S1
	Figure 3 S1B			Figure 3 S1C																						Figure 3 S1D				Figure 3 S1G											Figure 3 S1I			Figure 3 S1J
	mDia1 in membrane fraction				norm. ΔF [Syph-pH; 40Hz5s]																										relative intensity
	mDia1-WT	mDia1-ΔN		time [s]	shCTR					shmDia1					shmDia1 + mDia1-WT					shmDia1 + mDia1-ΔN						Gene/protein	Fold change [log2]	p-value [-log10]		distance [nm]	Bassoon			Myo2B			Homer1				postsynaptic mDia1			Basson			Homer
	1	0.683358		0	-0.0376739	-0.028936	-0.00419956	-0.0557873	-0.01637	-0.048152	-0.00691466	-0.0211804	-0.0130439	0.00271598	-0.112948	-0.0197996	-0.0191008	-0.00438832	-0.0103337	-0.00388801	-0.0101867	-0.0202573	-0.01359	-0.02919		mDia1	7.49371	3.03687		416.262	0.15266	0.128002	0.181658	0.371057	0.438818	0.37499	0.111325	0.128168	0.145243		DMSO	Dynasore		DMSO	Dynasore		DMSO	Dynasore
	1	0.49258		2	-0.0279518	-0.041231	0.000153386	-0.0408432	-0.02043	-0.0569349	-0.0168502	-0.0118342	-0.00918639	-0.010089	-0.0577701	-0.0114067	-0.0117591	-0.00397088	-0.00654357	0.000102308	0.000204248	-0.0160212	-0.02128	-0.02812		Igkv9-124	4.57968	2.6493		397.341	0.157619	0.132281	0.179789	0.399134	0.420084	0.391854	0.110176	0.130237	0.149251		25.5864	35.6395		98.735	74.1367		226.747	108.854
	1	0.163522		4	-0.0132271	-0.0300963	-0.0076413	-0.00390645	-0.02389	-0.0235272	-0.00404966	-0.0108384	-0.00425978	-0.012166	-0.100889	-0.00428631	-0.00410221	-0.00252625	-0.00404029	-0.00346205	-0.0127044	-0.0109962	-0.02366	-0.0174		Igkv4-58	-1.26146	0.115788		378.42	0.157212	0.129663	0.179797	0.4177	0.401253	0.381315	0.116221	0.132225	0.150996		23.3094	25.8179		86.6067	65.049		93.3852	54.2105
	1	0.846889		6	0.00066094	0.019903	0.0172857	0.0300764	-0.00181	0.0317528	-0.00530161	0.00737637	0.00719856	0.0048283	0.0813642	0.0051866	0.00815888	-0.00133517	0.00141836	-0.00222237	0.00164288	0.00641461	0.011344	0.016526		Igkv5-39	-1.46837	0.0913234		359.499	0.154465	0.133546	0.174237	0.461512	0.404046	0.382552	0.116073	0.134352	0.155631		27.0722	36.0641		113.255	65.1514		51.2568	64.6758
	1	0.654657		8	0.0781918	0.0803603	0.324384	0.0704606	0.062507	0.0968613	0.0331161	0.0364766	0.0192915	0.0147107	0.190243	0.0303059	0.0641097	0.0122206	0.0194992	0.00947014	0.021044	0.0408601	0.047185	0.058185		Ighg2b;Igh-3	-1.32598	0.0210233		340.578	0.149728	0.131624	0.175761	0.456203	0.407425	0.388068	0.118837	0.138091	0.155123		14.908	38.2059		77.7239	96.7193		93.0033	194.409
				10	0.349827	0.344673	0.693688	0.335706	0.354408	0.380737	0.299397	0.350455	0.254626	0.266418	0.452898	0.363522	0.414807	0.287284	0.292026	0.260085	0.231365	0.314957	0.376571	0.53522		Ighg1	2.33305	1.61516		321.657	0.170027	0.141446	0.181839	0.469266	0.431976	0.40745	0.124266	0.140412	0.154733		24.1392	23.4445		94.8061	89.9206		96.6954	70.2776
	One sample t-test			12	0.733536	0.726266	0.991566	0.694821	0.782557	0.76505	0.726363	0.731268	0.677515	0.703788	0.805295	0.779603	0.817027	0.724727	0.702747	0.679334	0.649398	0.719805	0.747737	0.861963		Ighg3	-1.07441	0.157512		302.736	0.174932	0.145819	0.19627	0.495569	0.460033	0.414135	0.129611	0.145547	0.160543		25.7986	89.5137		138.571	165.492		61.3083	237.951
	p = 0.0203			14	0.977008	0.919893	0.918429	1	1	0.965231	0.967727	1	1	1	0.981778	1	0.985566	1	1	1	0.991008	0.998575	0.98536	0.999139		Ighm	0.850456	0.534952		283.815	0.181591	0.145376	0.19669	0.521758	0.47016	0.443962	0.140773	0.148766	0.163377		20.4537	55.2828		124.392	109.394		131.516	143.929
				16	0.959409	0.969256	0.799889	0.93256	0.907939	0.978277	0.965808	0.941985	0.934076	0.905257	0.923453	0.909336	0.897518	0.91507	0.902932	0.964059	0.924282	0.94893	0.959086	0.946596		Ighv6-3	-0.132199	0.266599		264.894	0.197953	0.152148	0.201919	0.518338	0.461254	0.470193	0.148981	0.149233	0.166198		40.0776	43.0878		82.5411	95.6602		67.6677	84.4095
				18	0.849373	0.95753	0.695844	0.814821	0.815008	0.917078	0.909594	0.883398	0.846648	0.806332	0.902348	0.816966	0.803227	0.803181	0.792851	0.899709	0.806664	0.867474	0.890388	0.924322		Ighv1-81	-0.420537	0.184614		245.973	0.207502	0.166236	0.209165	0.522371	0.473783	0.477553	0.152956	0.154412	0.170522		21.65	55.3214		171.334	113.426		143.356	57.9981
				20	0.782099	0.852277	0.626253	0.745741	0.721328	0.85195	0.857254	0.795765	0.754542	0.710661	0.738959	0.723201	0.712226	0.715061	0.68768	0.814492	0.721498	0.797504	0.826247	0.858164		Slc12a5	1.70182	1.0609		227.052	0.217653	0.164627	0.228803	0.552934	0.494571	0.488278	0.162491	0.159126	0.172189		15.1531	21.3413		191.491	79.4663		111.655	156.088
				22	0.728894	0.794342	0.550891	0.64491	0.608674	0.793916	0.799179	0.726473	0.687058	0.644476	0.58965	0.647907	0.639632	0.618362	0.607165	0.752523	0.648261	0.726353	0.765025	0.789339		Clasp1	-0.0419788	0.285033		208.131	0.229291	0.184501	0.245772	0.556623	0.532963	0.496124	0.176592	0.165857	0.181349		85.6545	24.1006		224.289	160.026		168.564	160.926
				24	0.645039	0.709291	0.492577	0.587481	0.530947	0.731379	0.748239	0.665961	0.614699	0.574462	0.563043	0.586983	0.582001	0.544147	0.530032	0.696199	0.582233	0.663277	0.705133	0.731686		Abi2	0.579353	0.46863		189.21	0.237254	0.20619	0.265535	0.554653	0.565566	0.496742	0.190736	0.174138	0.188446		35.8325	11.8882		131.123	67.7821		123.24	89.5658
				26	0.548207	0.654245	0.454245	0.521714	0.48765	0.688306	0.702924	0.593946	0.569549	0.527771	0.501747	0.530683	0.526914	0.479644	0.476906	0.618708	0.522908	0.611903	0.679568	0.691139		Mag	1.12908	0.915857		170.289	0.26798	0.23708	0.293713	0.580832	0.603175	0.477809	0.199813	0.182398	0.187915		31.954	61.7855		101.742	134.232		84.2186	95.9315
				28	0.45223	0.601445	0.408158	0.475663	0.431589	0.635658	0.663129	0.547273	0.521427	0.486233	0.478438	0.488186	0.481831	0.432993	0.437636	0.57208	0.479529	0.571352	0.629614	0.666874		Kif1a	1.16358	1.18597		151.368	0.30084	0.255974	0.329714	0.604149	0.618546	0.474366	0.218558	0.193267	0.198799		44.7086	70.2564		92.2096	182.779		91.6665	116.429
				30	0.441834	0.534794	0.370624	0.450814	0.38387	0.603256	0.6002	0.499682	0.48221	0.446795	0.411978	0.446662	0.443885	0.394644	0.400509	0.525623	0.450449	0.533232	0.58299	0.639631		Nucks1	0	-4.34e-08		132.447	0.337687	0.28971	0.372229	0.635933	0.642795	0.529309	0.231725	0.205158	0.217837		10.7131	25.5285		156.029	64.639		38.4872	89.0565
				32	0.381392	0.493709	0.364977	0.402335	0.341472	0.555572	0.560482	0.477767	0.458991	0.413092	0.361817	0.397296	0.395042	0.348209	0.367025	0.48428	0.415364	0.501751	0.545803	0.627077		Tuba4a	0.870929	0.543126		113.526	0.376466	0.332424	0.409566	0.682008	0.670669	0.549104	0.256652	0.221992	0.22819		21.8237	28.7316		156.029	132.216		38.4872	77.0889
				34	0.301615	0.45987	0.324344	0.380075	0.328178	0.525876	0.566442	0.448003	0.424028	0.393355	0.2304	0.378982	0.373987	0.315206	0.342248	0.465592	0.396495	0.460619	0.509317	0.61147		Mapt	1.38841	1.0751		94.605	0.430926	0.385441	0.463595	0.718965	0.699413	0.622621	0.285313	0.241643	0.246573		39.6531	12.6099		132.763	79.9104		165.127	96.8227
				36	0.294904	0.429709	0.311237	0.345891	0.309386	0.508936	0.527526	0.425621	0.39634	0.374839	0.256987	0.346054	0.341918	0.297608	0.316134	0.424952	0.373613	0.421931	0.476859	0.577955		Gapdh;Gm3839;Gm7293	1.13726	0.843856		75.684	0.512754	0.473072	0.541863	0.749592	0.751368	0.66248	0.309736	0.261319	0.261258		38.0708	45.1524		85.4792	99.9991		72.442	87.847
				38	0.31198	0.397311	0.277132	0.319514	0.29638	0.480375	0.498267	0.391273	0.370759	0.350917	0.261416	0.311387	0.310254	0.276559	0.304346	0.400254	0.358874	0.387892	0.441015	0.546927		Gm8797;Uba52;Kxd1;Ubc;Ubb;Rps27a;Gm7808	-0.26742	0.243039		56.763	0.604213	0.578122	0.624706	0.780227	0.804508	0.76131	0.352258	0.296768	0.289078		27.2458	44.5735		130.884	151.895		164.045	128.46
				40	0.299438	0.341871	0.260194	0.304091	0.263303	0.453321	0.467345	0.357223	0.355509	0.33643	0.203462	0.283485	0.279493	0.256077	0.281124	0.37876	0.358048	0.358205	0.429442	0.512239		Camkv	-0.375318	0.234804		37.842	0.733397	0.716494	0.743895	0.803135	0.904073	0.873115	0.386522	0.337424	0.336935		12.4343	59.4507		288.621	95.6944		159.079	45.4322
				42	0.261074	0.315742	0.246537	0.276872	0.250425	0.439838	0.428962	0.348543	0.338783	0.310011	0.221265	0.267022	0.265056	0.24014	0.272732	0.354479	0.332919	0.344996	0.407589	0.497602		Atp6v1h	0.527315	0.448399		18.921	0.851975	0.853406	0.87923	0.889325	0.963508	0.907642	0.455433	0.400667	0.375058		27.9791	38.5532		215.167	64.9123		123.177	38.6209
				44	0.252458	0.30973	0.232413	0.259456	0.216965	0.426624	0.422022	0.330438	0.311708	0.283844	0.164044	0.26386	0.260755	0.217568	0.260982	0.32387	0.326439	0.314495	0.386034	0.483554		Prkar2a	0.56472	0.459435		0	1	1	1	0.944769	0.984917	1	0.523342	0.473534	0.430441		14.1188	90.4399		77.2456	168.43		97.7776	131.261
				46	0.235645	0.303453	0.223022	0.21991	0.21077	0.420983	0.392778	0.309127	0.297572	0.28986	0.148452	0.236748	0.235969	0.204837	0.252275	0.31613	0.315059	0.29126	0.355744	0.461949		Ighg2c	-2.51227	0.0249585		-18.921	0.837179	0.8356	0.880265	0.986392	1	0.996952	0.612016	0.556784	0.523797		36.1026	66.2428		315.986	132.216		131.007	126.423
				48	0.241152	0.298394	0.209771	0.216612	0.197157	0.381601	0.369038	0.293867	0.282186	0.277933	0.125422	0.217436	0.217108	0.192184	0.241119	0.301835	0.301312	0.268336	0.353271	0.434		Igkv4-57	-2.49045	0.0201693		-37.842	0.721455	0.664857	0.752705	1	0.917329	0.99782	0.711001	0.652312	0.621255		22.0552	48.645		153.364	114.656		112.037	160.607
				50	0.232008	0.286526	0.199346	0.198039	0.17767	0.350027	0.351156	0.269645	0.262568	0.268137	0.125854	0.211281	0.207718	0.165931	0.228449	0.272614	0.295511	0.245735	0.328552	0.428165		Igkv2-137	0.0801799	0.318418		-56.763	0.610403	0.529058	0.636201	0.988196	0.86854	0.955072	0.803628	0.762955	0.725455			45.1717		78.0656	140.381		107.899	146.857
				52	0.228294	0.256447	0.186816	0.201531	0.163674	0.355599	0.359786	0.25864	0.25729	0.264572	0.140181	0.193633	0.193783	0.178123	0.229825	0.25308	0.286294	0.243899	0.321596	0.410973		Igkv1-135;Igkv1-133	-1.16788	0.0979515		-75.684	0.510498	0.408515	0.5195	0.942499	0.845445	0.904194	0.892298	0.875615	0.828653			37.4341		115.578	128.902		106.562	271.435
				54	0.193797	0.247885	0.182224	0.170661	0.153422	0.324831	0.329201	0.236511	0.237416	0.250846	0.137112	0.179938	0.177618	0.16111	0.214449	0.24894	0.287215	0.219198	0.29632	0.417512		Amphiphysin	2.23743	1.36853		-94.605	0.440275	0.340624	0.444925	0.906263	0.824331	0.879072	0.957221	0.962771	0.922342			45.6541		96.9585	69.7978		186.834	218.79
				56	0.180674	0.200697	0.16899	0.154782	0.148692	0.318657	0.322752	0.214534	0.230597	0.24945	0.122875	0.163038	0.161864	0.143803	0.208934	0.220327	0.266077	0.212216	0.265724	0.394839		Aldh2	1.26304	0.982611		-113.526	0.388002	0.290343	0.371894	0.878801	0.824679	0.838276	1	1	0.979977			21.4956		75.7766	83.976		119.166	181.359
				58	0.191189	0.204432	0.158391	0.145887	0.141204	0.298219	0.301445	0.208982	0.20727	0.230008	0.0499349	0.152106	0.151344	0.142784	0.206218	0.219546	0.271493	0.209478	0.262786	0.377827		Rufy3	0.625452	1.53016		-132.447	0.339184	0.249734	0.315456	0.852555	0.813706	0.812404	0.994061	0.992183	1			34.7133		75.8449	105.944		154.433	133.235
				60	0.185784	0.176048	0.152998	0.12561	0.128914	0.278351	0.292025	0.200582	0.201151	0.227387	0.141824	0.146544	0.144521	0.131184	0.194342	0.206621	0.246231	0.18475	0.244616	0.361576		Lgi1	1.07863	0.657283		-151.368	0.292123	0.222128	0.285087	0.802829	0.801053	0.736354	0.964794	0.938677	0.98873			53.9513		70.3103	123.162		87.4014	70.023
				62	0.14579	0.166935	0.151925	0.116972	0.11604	0.243984	0.267056	0.194649	0.203993	0.227852	0.119035	0.132327	0.130706	0.111392	0.191501	0.202621	0.244475	0.175078	0.228996	0.337363		Qdpr	0.738976	0.871985		-170.289	0.26503	0.208497	0.260061	0.755429	0.760118	0.709805	0.901573	0.848975	0.934481			44.5735		191.047	95.0111		150.804	114.774
				64	0.124284	0.119007	0.114803	0.0935831	0.113495	0.234896	0.258438	0.19699	0.186096	0.217893	0.0864344	0.12374	0.12398	0.10686	0.179019	0.1795	0.231426	0.174372	0.223824	0.347746		Nras;Hras;Kras	1.28839	1.39828		-189.21	0.255463	0.191815	0.227817	0.699681	0.718215	0.682835	0.842944	0.743985	0.870572			53.1988		163.887	96.5827		113.055	148.64
				66	0.150864	0.105939	0.117328	0.0941235	0.105586	0.216273	0.241943	0.190832	0.172451	0.209945	0.0658952	0.118197	0.117412	0.093963	0.180387	0.181947	0.233043	0.15613	0.221721	0.346146		Dclk1	1.63225	1.03007		-208.131	0.237237	0.183663	0.214631	0.662289	0.670901	0.681607	0.77807	0.646971	0.795219			62.1135		145.096	129.244		83.2	205.74
				68	0.141613	0.0964059	0.104374	0.0797046	0.104187	0.196365	0.243108	0.179288	0.160684	0.20547	-0.0024712	0.109999	0.109126	0.0872328	0.172011	0.165487	0.220207	0.1525	0.197933	0.311413		Atp1a3	1.5869	0.857133		-227.052	0.204136	0.175909	0.196056	0.657505	0.643272	0.656631	0.7138	0.556451	0.713004			46.3102		135.803	112.913		51.4733	174.421
				70	0.142239	0.111497	0.0982109	0.0610258	0.113001	0.206191	0.211154	0.168237	0.169578	0.207046	-0.0345473	0.101437	0.100948	0.0716617	0.168533	0.159414	0.221172	0.143799	0.182118	0.29919		Sep 11	1.35614	0.616835		-245.973	0.19288	0.164847	0.178342	0.654277	0.60802	0.640082	0.657	0.485176	0.616966			47.1785		135.803	111.786		54.9808	71.7417
				72	0.124764	0.0813879	0.0966711	0.0604	0.105344	0.215251	0.200516	0.164776	0.15526	0.189001	0.0171897	0.0901336	0.0898896	0.070998	0.162807	0.154807	0.210392	0.128159	0.168986	0.275597		Dynamin1	2.62683	1.0042		-264.894	0.189911	0.158578	0.169506	0.624383	0.586493	0.616387	0.598956	0.426182	0.537677			15.5062		161.7	73.7267		97.3956	75.4339
				74	0.0857357	0.0563563	0.0808356	0.0442727	0.097683	0.194095	0.193749	0.162079	0.143163	0.19108	0.0271299	0.0837707	0.0831629	0.0592706	0.158999	0.141804	0.206555	0.121649	0.17175	0.273392		Hmgb1	1.65436	1.12975		-283.815	0.182129	0.148991	0.160241	0.606223	0.569628	0.560754	0.540074	0.378075	0.465509			27.7282		121.523	44.7212		79.6989	39.6967
				76	0.0957705	0.0705938	0.0777187	0.0293896	0.086426	0.162593	0.195489	0.142035	0.137241	0.179495	0.0407601	0.0748121	0.0747698	0.0510858	0.147214	0.148735	0.210428	0.114809	0.163324	0.263003		Ptprz1	0.938815	0.649115		-302.736	0.167495	0.141991	0.158953	0.592332	0.556024	0.517047	0.494099	0.338188	0.406802			46.0979		110.009	101.673		91.4118	130.816
				78	0.101467	0.0570957	0.0674772	0.0349468	0.07155	0.164904	0.174124	0.149021	0.131397	0.178339	0.0868569	0.0804955	0.0793628	0.0621562	0.143198	0.142146	0.185397	0.0970551	0.15855	0.25769		Eif4g3	1.65742	1.01455		-321.657	0.176276	0.135342	0.15328	0.587264	0.5285	0.488377	0.442694	0.311539	0.356913			19.431		144.105	58.5919		142.21	33.662
				80	0.0978443	0.0254912	0.0556977	0.032389	0.052224	0.169637	0.164993	0.14464	0.118933	0.169919	-0.0138575	0.072734	0.0720462	0.051763	0.144202	0.132781	0.187451	0.087072	0.141586	0.25659		Igsf8	0.537409	0.42361		-340.578	0.169172	0.142311	0.155384	0.567039	0.516081	0.495594	0.398892	0.286003	0.314033			56.2861		141.236	84.386		219.872	131.643
				82	0.0916492	0.00353465	0.0421338	0.0285291	0.041323	0.175808	0.145475	0.130579	0.116592	0.170286	0.00369176	0.0721311	0.0711333	0.0408743	0.140181	0.131602	0.177671	0.0868382	0.142156	0.240756		Cacnb1	0.525592	0.475908		n =	95	105	67	95	105	67	95	105	67			46.9276		126.75	117.081		219.872	20.0202
				84	0.079898	-0.00153086	0.0438084	0.0281336	0.036924	0.159742	0.142559	0.112601	0.106738	0.166656	-0.0523864	0.0700301	0.0700479	0.0407952	0.132633	0.125413	0.167282	0.100469	0.132679	0.227133		Dbn1	0	-4.34e-08			267			267			267					64.4097		94.8061	133.822		112.673	74.7336
				86	0.0565305	0.0123858	0.0421283	0.00205264	0.029752	0.134655	0.127756	0.0954779	0.0992778	0.154875	-0.0812583	0.0752264	0.0745899	0.0307088	0.133952	0.126521	0.184743	0.078934	0.143308	0.210434		Madd	0.633905	1.3958														64.4097		60.9151	133.822		68.8135	74.7336
				88	0.0592293	0.0263788	0.0299401	0.0262307	0.011728	0.119835	0.127529	0.098786	0.0855916	0.155993	-0.0940013	0.0791651	0.077144	0.0311087	0.126556	0.114739	0.181491	0.0754446	0.137948	0.215479		Ndufa12	0.85924	0.669896														30.7384		141.27	110.078		89.8204	225.538
				90	0.0444899	0.0165618	0.0244023	-0.00558468	0.006322	0.123717	0.110817	0.0979576	0.09271	0.14824	-0.0951617	0.0598589	0.0620785	0.027323	0.122165	0.123126	0.171854	0.0573733	0.139292	0.186763		Kctd12	0.393019	0.356825														61.0908		165.492	118.721		126.232	32.8981
				92	0.0551387	-0.000437682	0.0166567	-0.00982772	-0.01492	0.102014	0.0996989	0.101781	0.081169	0.146749	-0.0856484	0.0446694	0.0437393	0.0209437	0.120144	0.10655	0.162001	0.0452456	0.133642	0.187901		Syt2	0.00550079	0.302693														42.5475		64.7415	119.951		163.408	171.429
				94	0.0531065	-0.0145454	0.0101593	0.00458345	-0.00525	0.0889393	0.0970508	0.0937554	0.0740787	0.145672	-0.08085	0.0363299	0.0349543	0.0134766	0.123199	0.107197	0.160306	0.0355412	0.125185	0.18756		Fasn	2.98835	1.95024														92.6396		78.1339	115.1		110.827	159.27
				n =	7	11	8	7	8	8	12	8	10	13	6	8	8	6	7	4	11	8	5	9		Smarca2	-0.0955289	0.272806														38.7848		131.909	89.4081		76.6433	99.9419
					41					51					35					37						Sirt2	1.8286	0.837679														73.1315		144.959	98.1884		70.4049	55.4837
																										Cd81	1.32276	0.674414														92.2923		33.0916	105.773		152.204	167.992
																											-3.77584	0.0045492														37.1253		58.5577	76.8357		247.499	157.934
																											-0.818646	0.115688													16.9843	74.5015		55.2096			98.3505
																											-0.794942	0.150901													47.9117	33.7485		53.843			62.5878
																										Vdac3	0.505484	0.472732													43.8403	39.0356		50.5974			113.246
																										Ldha	1.44602	0.900039													21.5149	27.9791		55.5171			171.811
																										Bag6	0.558298	0.727044													16.8067	62.8275		30.4063			87.9107
																										Gphn	1.34293	0.993416													24.5637	104.584		35.6334			113.628
																										Actn1	0.812863	0.633723													55.167	106.398		39.5282			147.112
																										Lasp1	0.200009	0.359788													20.1835	42.8755		57.7719			67.413
																										Sep 09	1.70203	1.54511													12.415	14.7054		38.7082			210.005
																										Gstm1;Gstm7;Gstm2	2.51331	2.37107													50.4588	33.3819		32.2409			67.9223
																										Gpm6b	0.390423	0.387428													19.5853	23.4831		34.4718			107.454
																										L1cam	1.88186	1.07313													18.9312	21.7079		73.4534	78.783		106.753	34.6741
																										Psmc3	0	-4.34e-08													22.8849	27.1686		69.4903	61.3592		74.4153	27.2262
																										Arhgap1	0.982313	0.658929													21.4184	38.3989		24.3524	72.326		62.2122	73.2695
																										Dgkz	1.0898	0.977655													25.0268	21.0325		69.627	138.297		100.451	19.3518
																										Atp2b3	1.06006	0.774637													26.1459	43.0878		36.1459	109.428		66.9038	39.3211
																										Rap1gap	0.469064	0.43335													40.5793	42.5668		70.7544	41.783		57.2597	41.5491
																										Endophilin-A1	1.88442	0.64722													30.5454	55.4371		51.6907	54.1163		62.9379	52.1417
																										Capzb	1.74424	1.16609													10.1303	18.5916		62.2475	50.2216		103.761	31.6695
																										Plch2	0.381793	0.544742													39.4601	24.5444		32.6782	47.4543		71.1052	139.091
																										Map1a	2.22235	1.38255													29.6771	69.6003		52.5448	34.1234		152.905	51.2505
																										Nckap1	1.47046	1.02708													39.6917	30.5261		63.8532	43.7645		161.69	86.0646
																										Epb4.1l1;Epb41l1	1.84218	1.52845													26.802	53.2374		36.385	54.3213		108.345	42.9241
																										Sh3glb2	0.889963	0.655708													28.3071	44.4964		29.5556	57.7378		201.73	39.0665
																										Set	2.12322	1.03599													11.0701	92.3502		123.162	34.0789		130.943	34.3749
																										Sptan1	2.11571	1.45747													25.8758	23.7147		95.0111	36.795		104.08	29.3524
																										Hbbt1;Hbb-bs	2.31954	1.11576													50.2272	43.4351		96.5827	132.694		60.8691	36.4183
																										Vamp2;Vamp3	1.77881	0.800024													22.3447	46.8505		129.244	43.2863		162.071	58.7302
																										Dmxl2	1.26172	1.19328													21.1483	19.5082		112.913	108.233		154.433	90.7753
																										Srcin1	-0.0314026	0.286237														47.4679		111.786	76.3574		92.1121	44.8274
																										Sep 08	2.04393	0.964094														17.8506		73.7267	105.67		62.0022	57.9918
																										Vps13d	0.190928	0.520512														29.1754		44.7212	95.8994		131.389	69.7047
																										Hnrnpk	1.55496	0.968404														16.3996		101.673	104.406		105.416	39.6203
																										Dip2c	1.37962	1.16096														49.0888		58.5919	110.556		160.926	79.1896
																										Tnik	0.981793	1.25437														35.4659		84.386	95.1478		118.339	51.9571
																										Max	0.565023	1.33326														40.56		117.081	97.9834		54.8598	61.0155
																										Abi1	1.99364	1.07337														36.3535		133.822	98.2909		99.8782	38.1625
																										Vamp1	-0.190715	0.233202														16.6234		133.822	65.4931		79.2533	31.0266
																										Ndufb10	1.42036	0.701838														23.0586		110.078	120.737		152.523	20.5931
																										Ndufv1	1.08113	0.884428														25.7021		118.721	44.1745		82.6908	73.3968
																										Adam22	1.79294	0.856393														50.4781		119.951	40.2456		55.8274	62.9761
																										Gm9755;Tufm	1.66943	0.889719														17.8641		115.1	41.4072		28.633	65.8216
																										Ndufs2	1.01666	0.72316														17.8641		89.4081	56.5079		13.2216	102.234
																										Mapre2	1.6332	0.749365														37.0288		245.095	62.8624		30.9183	89.5658
																										Atp1a2	1.82876	1.06555													29.4456	40.1741		245.608	65.9372		71.3598	29.4415
																										Cdc42bpa	2.23488	1.61683													24.1778	27.8247		98.1884	59.6852		58.8066	89.8841
																										Cdh2	1.49669	1.35412													98.7564	96.383		141.27	43.4912		39.9513	103.57
																										Dync1i1	0.868831	0.848218													59.7787	65.2202		165.492	36.7609		69.4501	101.597
																										Stmn1	0.508972	0.480051													53.797	123.166		91.5605	43.4229			45.846
																										Dlg1	1.27681	0.722994													70.3336	122.49			63.6824			71.9964
																										Napg	1.21189	0.645249													53.5075	74.5208			50.1874			26.4751
																										Tpm3;Tpm3-rs7	0.875928	1.00897													31.6067	40.4056			50.1874			28.5057
																										Dip2a	0.826074	0.606462													29.9858	79.0167			41.0656			48.2267
																										Gls	1.07601	0.724802													61.2645	81.3322		94.4303	106.115		44.802	16.6082
																										Stx1a	1.51296	0.851224													86.079	142.616		100.341	109.463		21.5735	67.5404
																										Kcnab2	0	-4.34e-08													76.0837	54.5688		106.183	191.901		23.8333	69.8957
																										Psd3	1.41938	1.13098													206.273	41.1775		98.6325	132.592		76.8343	40.8043
																										Dnm1l	0.881379	0.747467													61.2838	20.0484		68.1921	164.946		18.6579	45.1967
																										Prrt2	0.247053	0.36793													26.4354	46.5031		71.9843	143.285		45.0439	32.1342
																										Slc25a22	0.486517	0.520082													55.167	31.626		84.8643	134.368		35.9791	55.5282
																										Dpysl3	2.08577	1.05059													114.56	93.1992		156.097	137.102		24.9027	136.862
																										Dpp6	1.01983	0.930807													31.8575	43.5701		95.7969	180.49		16.9456	169.25
																										Acot7	0.176047	0.363881													89.1471	52.0989		88.3149	140.552		17.0983	125.827
																										Usp14	0	-4.34e-08													165.096	44.3034		199.486	146.121		14.7176	108.369
																										Gm10036;Rpl11;Gm5093	0	-4.34e-08													119.847	26.4354		99.5208	66.1422		187.904	200.476
																										Kif21a	0.517902	0.624517													82.3549	105.317		36.4534	88.4515		87.9732	205.191
																										Hsph1	1.04768	0.831949													79.1518	99.3353		81.3453	99.3841		117.901	137.922
																										Sep 07	2.14867	0.925296													34.9063	81.2743		68.8412	131.157		63.7507	111.581
																										Dctn1	0.683217	0.538856													25.9144	83.8986		60.4368	266.995		69.6611	98.1884
																										Rab11b;Rab11a	1.92882	1.19983													64.95	73.2665		105.773	85.4451		64.434	150.528
																										Sep 02	1.32422	0.816185													40.9652	89.0892		187.904	88.8273		47.9326	278.166
																										Dsp	2.81837	1.65939													26.5319	204.344		87.9732	123.812		44.9945	125.554
																										Eif4a2;Eif4a1	1.17604	0.948708													43.9947	110.122		117.901	87.7682		106.593	208.129
																										Rap1gds1	0.996447	0.730344													34.9449	151.917		63.7507	136.862		64.7415	140.45
																										Ogdhl	1.04629	0.669113													29.407	80.0973		69.6611	169.25		51.8615	101.332
																										Synaptojanin1	0.922185	0.525312													17.9375	119.635		64.434	125.827		41.5097	196.889
																										Cadps2	0.282323	0.427803													37.9164	264.354		47.9326	108.369		77.0065	99.2417
																										Clasp2	0.893125	0.894543													33.8257	71.5492		44.9945	200.476		70.7886	90.9026
																										Snap91	1.88851	1.18001													40.7529	62.8275		106.593	205.191		49.1967	232.094
																										Inf2	-0.287552	0.216475													113.518	130.788		64.7415	137.922		35.3601	137.181
																										Srgap3	1.74568	1.01831													72.8227	114.618		51.8615	111.581		115.271	66.3309
																										Pcx;Pc	1.15389	0.734812													53.3532	151.222		41.5097	98.1884		102.186	72.3147
																										Cyb5r3	1.00275	0.713054													33.189	54.5881		77.0065	150.528		74.615	242.152
																										Cops4	1.35178	1.16365														132.872		70.7886	278.166		56.8153	67.6677
																										Mbp	0.976212	0.834082												n =	92	135		49.1967	125.554		35.3583	73.4605
																										Gm9493;Rps7	0	-4.34e-08																35.3601	208.129			104.844
																										Add1	1.28302	1.12799													D'Agostino & Pearson test			115.271	140.45			105.798
																										Ahcyl2	0.89452	0.992509													p-value			102.186	101.332			134.89
																										Atp2b2	1.61588	0.800512													< 0.0001	< 0.0001		74.615	196.889	n=	131	128
																										Pip5k1c	1.26744	1.12438																56.8153
																										Anxa6	0	-4.34e-08													Mann-Whitney test			35.3583			D'Agostino & Pearson test
																										Csnk2b	0.403212	0.556039													p = 0.0002		n=	138	129		p-value
																										Cadm2	2.12524	0.988069																			0.0067	0.0006
																										Mink1;Map4k4	-0.26386	0.218646																D'Agostino & Pearson test
																										Gm10250;Atp5h	1.22023	0.573791																p-value			One sample Wilcoxon test
																										Atp2b1	1.15457	0.700079																< 0.0001	< 0.0001		p = 0.2346
																										Pak1	1.18029	0.944631
																										Slc25a3	0.408176	0.364885																One sample Wilcoxon test
																										Cpsf6	0.870874	0.781012																p = 0.8933
																										Ap2b1	1.62536	1.28646
																										Evi5l	1.38335	1.25333
																										Gnb1	2.23328	0.672745
																										Tcof1	0.455233	0.968322
																										Opa1	0.758337	0.535254
																										Srsf1	0.504518	0.639696
																										Tpi1	1.75989	1.1428
																										Atp6v0a1	1.56296	0.910284
																										Bin1	0.904652	0.582635
																										Dpysl2	1.68947	0.924604
																										Pten	0	-4.34e-08
																										Stxbp1	1.8814	0.851937
																										Prdx6	0.751981	0.700079
																										Flot1	1.41303	0.666974
																										Phb2	0.803897	0.518261
																										Ncam2	0.846774	0.546523
																										Purb	1.73523	1.00116
																										Anp32a;Anp32c	2.22912	1.03451
																										Crym	0.857159	0.848144
																										Asna1	0.214089	0.390066
																										Cntnap1	0	-4.34e-08
																										Pgrmc1	1.40206	0.850615
																										Snca	2.20347	1.73791
																										Atp2a2	0.979207	1.02158
																										Supt5h	1.73486	0.9483
																										Pip4k2a	1.27902	0.922538
																										Eif3d	0	-4.34e-08
																										Epb41l2	0.748329	1.64435
																										Cfdp1	1.36194	0.75152
																										Bsn	1.22778	0.579958
																										Syn1	1.87928	0.979701
																										Mtco2	0.427801	0.381696
																										Ca2;Car2	1.6368	1.14056
																											-1.74802	0.0720011
																											0.718054	0.449624
																										Igkv3-2	-2.95657	0.030255
																											1.00447	0.531825
																										Thy1	-1.41497	0.0791224
																										Igkc	1.1641	0.678734
																										Ighg;Igh-1a	-5.15561	0.00132189
																										Aldoc	1.17957	0.645758
																										Aldoa;Aldoart1	2.43642	0.98626
																										Prkaca	0.99263	0.693561
																										Got1	1.74056	1.05933
																										Got2	2.96101	1.05984
																										Gpi	1.66723	1.00854
																										Gap43	0.840251	0.494418
																										Anxa2	1.31179	1.27542
																										Alb	0.511938	0.507231
																										Hsp90aa1	2.26358	1.23366
																										Hsp90b1	2.17185	1.1964
																										Apoe	0.286609	0.395996
																										Sod1	0	-4.34e-08
																										Mdh2	2.0817	0.747912
																										Nefl	0.179824	0.388866
																										Gnai2	0.935123	0.659299
																										Ncl	1.71835	0.830978
																										Pgk1	2.26542	0.999625
																										Sod2	0.678481	0.468512
																										Eef1a1	0.584583	0.411052
																										Slc3a2	0.723719	0.49053
																										Sub1	1.15791	1.05997
																										Hsp90ab1	1.40512	1.05683
																										Camk2a	1.54796	0.668176
																										Itpr1	2.13887	1.36121
																										Tcp1	1.03366	1.09276
																										Cox5a	0.370429	0.419493
																										Cntn1	0.920081	0.4741
																										Ncam1	1.81482	0.696314
																										Atp1b1	1.12056	0.504402
																										Rps16	0	-4.34e-08
																										Mdh1	1.07767	0.684454
																										Rpsa	0.570379	0.612543
																										Atp1b2	1.91658	0.758433
																										Rplp0	0.37168	0.48679
																										Map1b	2.20558	1.09174
																										Glul	1.03396	0.47252
																										Ldhb	1.98549	1.14391
																										Cnp	2.2476	0.984786
																										Eno1	1.61784	0.758831
																										Eno2	3.0338	1.24837
																										Ap2a1	2.00174	1.36264
																										Ap2a2	2.17813	1.34937
																										Hk1	1.00805	0.62111
																										Ppia	2.9488	1.1066
																										Cfl1	0.552177	0.427463
																										Gnao1	2.49777	0.854087
																										Cox4i1	1.49904	0.579745
																										Hspa5	1.37852	0.957736
																										Map2	1.57543	1.05425
																										Gnaq	1.73916	0.771491
																										Eif3a	0.786261	0.671383
																										Cbx3	0	-4.34e-08
																										U2af2	0.513761	0.492801
																										Glud1	1.55246	0.61052
																										Marcks	1.05834	0.693392
																										Gna13	1.37429	1.06541
																										Pdia3	1.88938	0.997853
																										Camk2b	0.245801	0.37773
																										Napb	1.27414	0.624794
																										Kif5c;Kif5a	1.04057	1.30882
																										Ckmt1	1.72376	1.08725
																										Prkar2b	1.64998	2.08309
																										Slc6a1	0.852712	0.521858
																										Map2k1	1.1926	0.886211
																										Slc2a3	0.260816	0.371202
																										Rab5c	0	-4.34e-08
																										Pdha1	1.63279	0.735623
																										Canx	1.75961	1.07952
																										Gpm6a	1.45277	0.833275
																										Gnl1	1.07006	0.605096
																										Hspa9	1.35456	0.789013
																										Cap1	0.894739	0.711352
																										Tkt	1.47991	0.97772
																										Pura	1.27239	0.628831
																										Cct8	1.80376	1.11224
																										Slc1a2	1.31386	0.509285
																										Hist1h1e	0.12425	0.46301
																										Hist1h1d;Hist1h1c	0.216323	0.416336
																										Syt1	1.85148	0.827545
																										Nsf	1.27978	0.737124
																										Ina	-0.147813	0.243012
																										Rph3a	0.813533	0.747316
																										Capza2	2.11976	1.12745
																										Pfkm	0	-4.34e-08
																										Anxa5	1.79625	0.85628
																										Lmna	1.03371	1.28377
																										Hspa4l	1.40417	0.959296
																										Cbr1	1.0107	0.807113
																										Slc25a4	1.51079	0.519905
																										Psma2	0.764575	0.970872
																										Gdi1	1.63207	0.9885
																										Atp6v1a	2.56818	1.12102
																										Atp6v1e1	1.64379	0.993708
																										Rab7a	1.97964	0.994461
																										Hdgf	0.16489	0.358873
																										Atp6v0d1	1.83207	0.707779
																										Slc25a5	0.698104	0.420994
																										Pkm	1.56334	0.788257
																										Usp5	1.26048	1.00491
																										Atp5b	1.41602	0.777006
																										Slc1a3	0.497391	0.488942
																										Eef2	1.31813	0.809954
																										Arpc4	1.44535	1.10844
																										Plp1	0.2173	0.33894
																										Eif3e	-0.27044	0.0659557
																										Ppfia3	1.01603	1.21244
																										Pdxp	0	-4.34e-08
																										Actin	1.43471	0.855184
																										Rps20	1.12204	1.47469
																										Snap25	1.87324	1.02982
																										Dnajc5	1.16448	0.785955
																										Actr2	1.16757	0.929895
																										Stx1b	1.99805	1.02698
																										Abat	2.31851	1.53494
																										Ywhag	2.04134	1.1063
																										Ppp1cb	1.3488	1.12878
																										Calm1	2.45191	1.00454
																										Ube2h	1.1708	0.724885
																										Ywhae	2.57112	1.13039
																										Vsnl1	0.845862	0.752143
																										Atp6v1b2	1.55047	0.773601
																										Rab1;Rab1A	2.6697	1.47243
																										Cycs	2.44202	1.03365
																										Rps3	0.28717	0.406836
																										Rac1	1.18185	1.04789
																										Rab3a	2.15899	0.920043
																										Hspa8	1.4182	0.786903
																										Hspd1	1.56762	0.656611
																										Mapk1	1.41527	0.95698
																										Ywhaz	2.39345	0.976552
																										Rala	1.1709	0.789492
																										Rps10	0	-4.34e-08
																										Ppp3ca	1.69613	1.11603
																										Phb	0.0821158	0.323727
																										Gnb2l1	1.02788	0.898248
																										Ywhaq	2.07957	1.05421
																										Tuba1a;Tuba3a	1.28249	0.778455
																										Tubb4b	1.48663	0.848284
																										Prkcb	0.873377	0.670397
																										Ywhah	1.98754	0.832483
																										Kpnb1	1.05866	0.885475
																										Pebp1	1.97634	1.01269
																										Hnrnph2;Hnrnph1	0.261981	0.388719
																										Usp9x	1.2459	1.69373
																										Idh3g	0.629061	0.624294
																										Slc9a3r1	1.58222	1.43627
																										Naca	1.37645	0.67369
																										Cct7	0.490495	0.501205
																										Cct2	1.0485	0.778001
																										Cct5	1.75429	1.02041
																										Cct6a	1.10645	0.874802
																										Srsf3;Gm12355	-0.493036	0.171663
																										Nptn	0.883242	0.569415
																										Pkp1	2.32998	1.20012
																										Fh	2.00503	0.881699
																										C1qa	-1.24734	0.137376
																										Tubb5	1.9401	0.844714
																										Prdx5	1.97639	0.836201
																										Vcp	1.46378	1.02799
																										Uba1	1.51227	0.85794
																										C1qc	-1.61582	0.103621
																										Jup	2.25246	1.58182
																										Atp5a1	1.66225	0.775052
																										Ckb	2.49868	0.76912
																										Atp5i;Atp5k	1.22216	0.717331
																										6430548M08Rik;Kiaa0513	2.0044	1.19573
																										Rogdi	0.696671	0.84396
																										Gtf2f1	0.274313	0.503348
																										Pdia6	0.489995	0.471961
																										Srsf6	0	-4.34e-08
																										Hspa4	0.0579332	0.32449
																										Ndufv3	0.505913	0.462231
																										Trim21	-0.242002	0.233577
																										Ube2z	0.314487	0.409391
																										Puf60	1.77722	0.989699
																										MyoIIB	1.11927	0.862223
																										Aak1	1.5748	1.06885
																										Erc2	-0.0264263	0.288953
																										Pdap1	0.599211	0.508537
																										Ppp1r7	1.2222	1.03835
																										Gprin1	0.414637	0.53951
																										Oxr1	1.07045	1.00991
																										Prkca	0	-4.34e-08
																										Srsf4	0.0914097	0.34601
																										Taok1	0.146943	0.384192
																										Acsl6	1.3575	1.07006
																										Cyfip2	1.30064	0.963792
																										Flot2	0.237223	0.36751
																										Clint1	0.781403	0.595354
																										Cltc	1.34409	0.713414
																										Fam169a	0	-4.34e-08
																										Ogdh	1.74156	0.944374
																										Csnk2a1	0.9282	0.705894
																										Ppp1r1b	0.237925	0.370605
																										Stip1	2.20275	1.44015
																										Eps15l1	0.718632	0.849319
																										Vdac1	2.06034	0.702485
																										Mapre1	1.17618	0.788269
																										Prdx2	0.979479	0.561862
																										Gdi2	1.35729	1.20701
																										Pacsin1	2.61961	1.13932
																										Cbx5	0.709215	0.772902
																										Phgdh	1.4168	0.918857
																										Srsf2	0	-4.34e-08
																										Sptbn1	2.28614	1.21003
																										Trim28	0	-4.34e-08
																										Dbnl	1.28214	0.953236
																										Ndrg1	1.74584	1.10323
																										Ppp3r1	1.98087	1.16362
																										Syn2	1.24248	1.07167
																										Gpd2	1.39681	0.605738
																										Sptbn2	1.23117	1.15088
																										Snx1	1.11753	0.813252
																										Crmp1	1.49847	1.00463
																										Sirpa	0.750305	0.57571
																										Caskin1	0.116364	0.339189
																										Mapre3	1.71795	0.838231
																										Fam21	1.30774	0.998997
																										Ube2o	0.523263	0.645206
																										Taok2	0	-4.34e-08
																										Cand1	1.53152	1.1836
																										Larp1	0	-4.34e-08
																										Eif2s1	0.484748	0.486032
																										Cspg5	0.50234	0.470487
																										Ppp2r1a	1.29586	0.964952
																										Mtch2	1.13855	1.0125
																										Tpr	0.588104	0.791713
																										Cyfip1	0.872914	0.77626
																										Tubb2a	1.03628	0.643652
																										Dek	0	-4.34e-08
																										Tppp	0.994504	0.536767
																										Map6	2.05093	1.10064
																										Cdc42bpb	1.39762	1.21409
																										Ahcyl1	1.34132	0.989726
																										Cadps	2.06821	1.67308
																										Dnajc6	2.19652	1.75391
																										Pelo	1.57251	1.26959
																										Nfasc	1.22816	0.853373
																										Nrcam	0.668346	0.72654
																										Necab1	0	-4.34e-08
																										Eif4b	-0.845109	0.0546545
																										Aars	0.930632	0.865709
																										Slc25a12	0.634336	0.441266
																										Atcay	0.43441	0.457039
																										Rcc2	1.26847	0.74359
																										Pdhx	1.56892	0.995682
																										Srsf7	0	-4.34e-08
																										Dlat	0.982487	0.540575
																										Hadha	1.91754	0.784116
																										Sfxn5	1.12218	0.8034
																										Ndrg4	1.12694	0.740932
																										Ppme1	1.27355	0.765538
																										Aldh5a1	0.437553	0.441776
																										Ptges2	1.86147	1.57362
																										Vps13c	0.960483	0.575613
																										Tnr	1.99657	0.767578
																										Tmx4	0.215971	0.359991
																										Exog	0	-4.34e-08
																										Atp5c1	1.41187	0.571333
																										Pfkp	0.420129	0.410109
																										Efhd2	1.56953	1.43348
																										Ank2	1.18918	0.692228
																										Immt	0.43734	0.437563
																										Txnl1	0.493784	0.482832
																										Pcdh1	-0.00592105	0.299196
																										Eif2b5	-0.578041	0.147662
																										Pygb	1.18077	0.937497
																										Eif3b	0.669338	0.996308
																										Scamp1	1.55789	1.06258
																										Rtn1	0.960094	0.582679
																										Hspa12a	0.968646	0.499169
																										Pdxk	1.94199	1.45207
																										Cc2d1a	0.479405	0.749073
																										Pacs1	1.21027	0.859177
																										Sdha	1.35261	0.870321
																										Matr3	0.128759	0.361823
																										Appl1	1.44025	1.00936
																										Acat1	1.14794	0.952888
																										Eif3l	0.792287	1.2211
																										Gtf2f2	1.52255	0.944619
																										Eif3c	0.700485	0.993839
																										Dync1li1	1.04399	0.8106
																										Actr1b	1.49075	0.919023
																										Usp15	0.789544	1.01611
																										Wasf1	0.700986	0.583588
																										Cops8	0	-4.34e-08
																										Sgip1	1.12117	1.23807
																										Atp1a1	1.67691	0.739825
																										Wasf3	1.06927	0.833873
																										Rab14	1.77776	0.873175
																										Sfxn3	1.03588	0.554436
																										Idh3b	0.745323	0.665319
																										haemaglobin alpha 2;Hba	1.97369	0.710639
																										Ndufs1	0.766723	0.521622
																										Eif3h	0.0774288	0.348859
																										Pip4k2c	-0.181215	0.17192
																										Basp1	2.06474	0.711651
																										Sncb	1.81022	0.702091
																										Wdr7	0.382262	0.926911
																										Hnrnpll	1.84665	1.27683
																										Fam49b	1.27619	1.00573
																										Hadhb	1.07866	0.861888
																										Aco2	2.51048	1.19328
																										Dctn2	1.53936	0.883088
																										Ndufa10	1.06395	0.621712
																										Etfa	2.00828	0.770731
																										Srrt	0	-4.34e-08
																										Hsd17b10	0.596086	0.497258
																										Rtn4	2.11672	1.0114
																										Arhgdia	0	-4.34e-08
																										Acsbg1	1.73339	1.37102
																										Cox6c	0.20349	0.351684
																										Ndufa2	1.08401	0.701579
																										Gmfb	0.230405	0.370987
																										Rwdd1	-0.0685158	0.271201
																										Atp5f1	1.20556	0.569253
																										Ywhab	2.24462	0.959859
																										Cyb5b	0.839578	0.666929
																										Cacybp	0.367318	0.548173
																										Uqcrc1	1.06261	0.547591
																										Nsfl1c	1.21478	0.705707
																										Cs;Csl	1.9007	0.780649
																										Tomm70a	2.22405	1.50162
																										Rps19	-0.0375252	0.284305
																										Pdhb	0.987539	0.557881
																										Acbd6	0.511401	0.651635
																										Sarnp	1.01591	0.856517
																										Dlst	1.72877	0.678833
																										Ttpal	2.11757	0.869323
																										Tubb4a	0.0455983	0.315379
																										Ndufv2	0.883506	0.582968
																										Idh3a	2.28531	0.849416
																										Chmp4b	1.74812	1.06812
																										Eef1g	1.13807	0.907722
																										Napa	1.83957	1.03305
																										Atp5o	0.724761	0.440488
																										Btbd17	0.292849	0.417916
																										Uqcrc2	0.514238	0.376562
																										Pgam1	1.94561	1.0183
																										Ppp1r12a	0.305415	0.573047
																										Eif3f	0.515301	0.441952
																										Ndufs3	0.316215	0.376072
																										Dtd1	1.0691	0.626113
																										Vps35	1.75241	1.11981
																										Tubb3	1.27037	0.847058
																										Rtn3	0.967695	0.816508
																										Anp32b	1.22052	0.780955
																										Dync1h1	2.41472	1.10395
																										Akr1a1	0.557155	0.513311
																										Sv2a	0.785819	0.567724
																										Cend1	1.20304	0.590327
																										Tmod2	1.36755	1.01833
																										Ap3b2	1.95273	1.21544
																										Hdgfrp3	0.944746	0.590605
																										Drg2	1.35468	0.829296
																										Ehd3	1.69563	0.971369
																										Macf1	2.23474	1.21001
																										Add3	0.817179	1.06875
																										Add2	1.39392	0.853793
																										Ndrg3	1.14254	1.12453
																										Ndrg2	1.93409	1.11523
																										Pclo	0.5029	0.432681
																										Eif3i	0.973558	1.02667
																										Smap;1110004F10Rik	0	-4.34e-08
																										Uchl1	0.854901	0.604287
																										Gda	1.08237	0.718689
																										Sep 06	2.0234	0.926824
																										Atp6v1g2	-0.334636	0.20556
																										Suclg1	1.38778	1.00185
																										Mpp2	1.35967	1.06895
																										Epb41l3	0.747478	0.823459
																										Pacsin2	1.81275	1.93379
																										Ncdn	0.973761	0.618133
																										Clip2	1.7048	1.35348
																										Palm	0.570618	0.557412
																										Plcb1	1.45115	1.25777
																										Atp6v1c1	1.00432	0.908082
																										Sep 03	1.73901	0.798032
																										Letm1	1.22813	0.613471
																										Sucla2	0.694752	0.537326
																										Sep 05	2.28033	0.936584
																										Arfgap1	1.67288	1.32902
