# Supplementary material for: How am I using inquiry-based learning to improve my practice and to encourage higher order thinking among my students of mathematics?
Source: eLife journal article supplement (doi:10.7554/elife.92755), 2012-01-01
Supplement: fig3-figsupp1-data6 [file elife-92755-fig3-figsupp1-data6-v1.zip]

Figure 3 S1

B

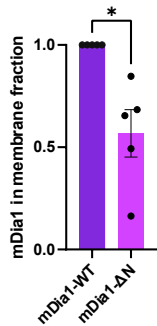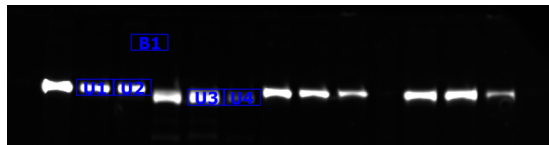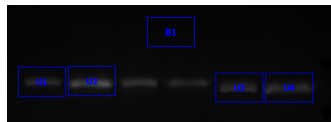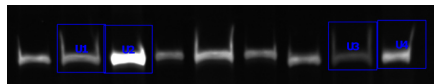

RFP

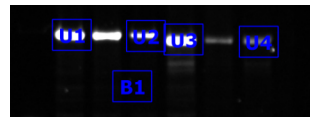

RFP

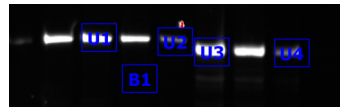

RFP

U1 = mDia1-WT (Cytosol)  
 U2 = mDia1-WT (Membrane)  
 U3 = mDia1-ΔN (Cytosol)  
 U4 = mDia1-ΔN (Membrane)  
 B1 = Background subtracted
