# Supplementary material for: Rho GTPase signaling and mDia facilitate endocytosis via presynaptic actin
Source: eLife journal article supplement (doi:10.7554/elife.92755), 2023-12-05
Supplement: fig4-data1 [file Figure 4-Source Data 1.xlsx]

## Sheet: Figure 4
	Figure 4B															Figure 4C				Figure 4D						Figure 4F				Figure 4I				Figure 4J
		relative intensity														presynaptic F-Actin				τ [s; vGLUT1-pH; 40Hz5s]						presynaptic F-Actin				presynaptic β-Actin				τ [s; vGLUT1-pH; 20Hz2s]
	distance [nm]	Bassoon				F-Actin				Homer1						DMSO	Dynasore			shCTR	shmDia1	shmDia1 + mDia1-WT	shmDia1+ mDia1-K994A			shCTR	shmDia1+3			shCTR	shmDia1+3			shCTR + DMSO	shmDia1+3 + DMSO	shCTR + Jasp	shmDia1+3 + Jasp
	416.262	0.201364	0.151411	0.0945747	0.0714127	0.603306	0.52905	0.295739	0.490127	0.145689	0.149544	0.0772086	0.050912			197.807	84.505			18.73	20.88	11.6	24.04			155.122	38.0641			40.6126	30.5624			12.28	36.17	6.6	11.85
	397.341	0.206499	0.216737	0.100257	0.0670131	0.600683	0.543249	0.304435	0.480162	0.144999	0.156649	0.0751366	0.0481633			91.6648	79.7845			19	32.91	14.74	35.54			71.8842	19.1986			42.7544	23.725			11.22	15.83	16.27	13.3
	378.42	0.218269	0.228895	0.103625	0.0642984	0.58904	0.555269	0.321646	0.472703	0.151061	0.158118	0.0726585	0.0520588			74.0962	71.9631			22.27	23.41	13.86	23.91			58.1068	28.7398			55.276	25.2902			12.5	21.71	23.26	15.67
	359.499	0.226084	0.257253	0.101215	0.0737634	0.601144	0.560673	0.320543	0.441993	0.149313	0.164174	0.0707503	0.0524814			71.0841	43.7486			24.11	31.7	14.61	28.02			55.7448	59.8106			30.5624	30.1505			12.11	25.36	15.23	15.16
	340.578	0.226753	0.260621	0.101159	0.079702	0.567423	0.581588	0.321559	0.459053	0.148902	0.170012	0.0739337	0.0566763			59.1249	65.3958			20.96	25.98	19.53	31.09			46.3662	33.5491			41.354	25.455			17.56	26.04	15.64	26.85
	321.657	0.230105	0.27107	0.111089	0.0815574	0.579458	0.611742	0.342045	0.492589	0.151783	0.178601	0.0732574	0.0592101			70.5706	125.321			19	23.64	22.09	31.08			55.342	43.2761			47.6972	16.4757			14.99	24.56	13.11	10.82
	302.736	0.22793	0.277465	0.125024	0.0897405	0.558796	0.643296	0.342169	0.48104	0.160861	0.19353	0.0770427	0.0603248			40.786	104.187									31.9847	19.6168			42.6721	28.0087
	283.815	0.242307	0.285251	0.12996	0.0955699	0.570335	0.66701	0.365678	0.507884	0.167889	0.200591	0.0822542	0.0650481			46.6718	239.679			one-way ANOVA with Tukey's post-test						36.6004	39.7989			51.2394	26.9378			one-way ANOVA with Tukey's post-test
	264.894	0.254539	0.309724	0.139053	0.0980454	0.565496	0.689707	0.400706	0.530064	0.1737	0.217648	0.0845192	0.0653135			47.3927	81.4337			p-value						37.1658	76.6858			58.5711	28.8325			p-value
	245.973	0.264544	0.318627	0.158038	0.109199	0.599468	0.696798	0.4069	0.587393	0.181651	0.240757	0.087014	0.0708591			89.8378	86.1838			0.0939	shCTR vs. shmDia1					70.4515	25.6884			49.2623	34.6814			0.0074	shCTR + DMSO vs. shmDia1+3 + DMSO
	227.052	0.275359	0.332455	0.162947	0.119341	0.593647	0.711092	0.42687	0.598783	0.185381	0.254152	0.0907775	0.0771625			81.5522	203.041			0.2246	shCTR vs. shmDia1 + mDia1-WT					63.9539	79.6907			33.5281	32.21			0.8656	shCTR + DMSO vs. shCTR + Jasp
	208.131	0.304351	0.366012	0.173913	0.127413	0.59154	0.694045	0.424934	0.555484	0.197471	0.271397	0.0951268	0.0856722			40.0157	145.664			0.0095	shCTR vs. shmDia1+ mDia1-K994A					31.3806	24.2789			62.69	38.0589			0.8656	shCTR + DMSO vs. shmDia1+3 + Jasp
	189.21	0.328991	0.38418	0.196091	0.15292	0.59949	0.700384	0.414375	0.559431	0.210134	0.279405	0.100199	0.098384			41.0921	135.986			0.0012	shmDia1 vs. shmDia1 + mDia1-WT					32.2248	48.6663			141.773	43.2487			0.0203	shmDia1+3 + DMSO vs. shCTR + Jasp
	170.289	0.370558	0.436478	0.223031	0.177573	0.575853	0.729849	0.446932	0.545376	0.224536	0.289277	0.113879	0.115612			44.7263	205.214			0.6985	shmDia1 vs. shmDia1+ mDia1-K994A					35.0747	61.2046			104.785	22.2422			0.0251	shmDia1+3 + DMSO vs. shmDia1+3 + Jasp
	151.368	0.415552	0.474644	0.274092	0.200771	0.606759	0.756102	0.470864	0.561908	0.234464	0.291685	0.125769	0.133567			93.5115	111.1			0.0001	shmDia1 + mDia1-WT vs. shmDia1+ mDia1-K994A					73.3325	35.9111			205.37	50.5804			0.8656	shCTR + Jasp vs. shmDia1+3 + Jasp
	132.447	0.470075	0.524186	0.331395	0.253802	0.620206	0.762004	0.496552	0.576648	0.248302	0.303117	0.13264	0.153466			53.1403	105.767									41.673	31.8763			127.687	20.8418
	113.526	0.501945	0.577871	0.387537	0.311735	0.654312	0.755507	0.520226	0.572368	0.264198	0.318816	0.153341	0.178578			75.854	110.112									59.4853	28.6623			263.117	57.6649
	94.605	0.544542	0.632356	0.465321	0.38609	0.642081	0.749942	0.572825	0.60529	0.287339	0.340323	0.183772	0.213717			75.9528	66.0081									59.5628	57.3943			60.5482	110.387
	75.684	0.594446	0.692048	0.541362	0.494947	0.62549	0.735616	0.598506	0.651417	0.310206	0.368335	0.219923	0.256092			38.959	91.1809									30.552	52.4534			57.3354	65.8204
	56.763	0.677202	0.740691	0.663467	0.620654	0.656721	0.76682	0.609557	0.688265	0.346649	0.380246	0.274139	0.305599			87.9417	104.779									68.9646	64.4341			71.7517	59.642
	37.842	0.764955	0.787415	0.775443	0.753262	0.676932	0.780587	0.658035	0.728338	0.387969	0.425972	0.332252	0.366239			50.8887	136.381									39.9073	35.7253			46.791	20.5123
	18.921	0.885578	0.870822	0.886918	0.881982	0.705262	0.795062	0.695357	0.759741	0.453779	0.462104	0.406985	0.428928			50.8887	116.63									39.9073	17.5335			68.7037	33.2809
	0	1	1	1	1	0.706657	0.800292	0.72447	0.75776	0.52288	0.507228	0.494997	0.503488			55.1549	206.695									43.2529	36.5539			68.7037	33.6104
	-18.921	0.891033	0.875318	0.880869	0.881506	0.723199	0.823908	0.780588	0.832595	0.599489	0.577482	0.584875	0.587048			41.26	91.2994									32.3564	35.0438			105.445	17.7114
	-37.842	0.763299	0.774571	0.768582	0.750543	0.716737	0.833882	0.794986	0.820773	0.696694	0.671523	0.68093	0.670189			40.3021	98.1036									31.6052	31.1638			128.099	32.9514
	-56.763	0.652191	0.691911	0.645637	0.591707	0.714211	0.836008	0.842781	0.823763	0.796578	0.763535	0.766319	0.781525			50.0394	70.6496									39.2413	19.1831			127.192	45.8848
	-75.684	0.548735	0.611099	0.500821	0.471859	0.742681	0.868187	0.859534	0.834061	0.876821	0.842691	0.845282	0.871703			54.9969	100.533									43.129	55.3033			81.4723	41.8483
	-94.605	0.456763	0.543038	0.387628	0.375388	0.824086	0.902073	0.901025	0.85302	0.94665	0.929004	0.936983	0.941125			81.8485	205.609									64.1862	64.6354			114.836	196.473
	-113.526	0.37721	0.47886	0.304558	0.291795	0.903168	0.954329	0.97178	0.900957	1	0.967653	0.989048	0.979687			81.8485	86.1443									64.1862	38.6682			92.2639	100.584
	-132.447	0.32292	0.449301	0.241346	0.230514	0.922515	0.972809	1	0.9282	0.997557	1	1	1			79.2611	68.1511									62.1572	70.7845			195.072	102.232
	-151.368	0.291642	0.402674	0.201129	0.198143	0.964614	0.995453	0.987667	0.968577	0.964554	0.976761	0.991021	0.972879			54.1081	82.0954									42.432	65.6035			110.222	76.1177
	-170.289	0.256142	0.379326	0.170418	0.166639	1	1	0.993525	0.988979	0.889992	0.938403	0.949082	0.921734			63.6676	79.1228									49.9286	28.5229			121.179
	-189.21	0.222588	0.347738	0.146536	0.133206	0.999234	0.997244	0.947351	1	0.816371	0.872768	0.893076	0.842808			74.5702	38.2776									58.4785	29.8705			94.4058
	-208.131	0.208155	0.324773	0.134366	0.112435	0.934986	0.992753	0.912468	0.983384	0.727753	0.799659	0.81006	0.758412			43.6301	104.779									34.2151	37.7079			71.4222
	-227.052	0.190044	0.30033	0.117234	0.108334	0.920047	0.98138	0.92505	0.966261	0.645505	0.742157	0.717104	0.663925			53.4168	50.3949									41.8899	11.7096			98.7718
	-245.973	0.17366	0.282527	0.0988025	0.1016	0.920723	0.939324	0.88711	0.969287	0.579978	0.666444	0.62051	0.586526			65.7118	79.8931									51.5318	12.0039			157.425
	-264.894	0.169064	0.256722	0.093788	0.104151	0.939396	0.929616	0.864503	0.937082	0.503206	0.596799	0.528564	0.504174			47.2545	103.693									37.0573	8.51893			139.549
	-283.815	0.172043	0.231386	0.0909242	0.0959698	0.917196	0.892011	0.80521	0.935211	0.444547	0.545967	0.445729	0.42976			98.9529	51.3133									77.5997	9.30112			231.648
	-302.736	0.162605	0.229787	0.0919732	0.084094	0.895578	0.892038	0.752101	0.892688	0.392356	0.481733	0.37216	0.373038			53.1106	77.3156									41.6498	29.9401			150.753
	-321.657	0.165518	0.221755	0.0909162	0.0900513	0.878917	0.868852	0.699549	0.868424	0.345962	0.428726	0.31208	0.31967			202.251	46.7212									158.607	21.6845			122.332
	-340.578	0.163317	0.218697	0.0887165	0.0782714	0.850748	0.863991	0.706212	0.859467	0.306672	0.398735	0.26534	0.276542			138.356	48.3605									108.5	27.8336			116.483
	-359.499	0.171495	0.212438	0.0791283	0.0770505	0.835759	0.852235	0.69719	0.779427	0.275843	0.355787	0.223012	0.235955			366.481	119									287.398	9.99812			72.1636
	-378.42	0.166518	0.204906	0.0839038	0.0829697	0.824411	0.818491	0.693155	0.747171	0.252342	0.333277	0.18166	0.213399			366.481	119									287.398	9.99812			100.749
	n =	59	32	27	36	59	32	27	36	59	32	27	36			139.146	66.334									109.12	16.1395			64.3376
		154				154				154						62.364	93.9164									48.9064	28.1047			43.4299	77.9136
																98.7455	64.0725									77.437				85.8054	27.0366
																104.187	74.4221									81.7042				54.0403	60.2928
																60.4679	55.1351									47.4194				75.4587	70.656
																114.359	34.9792									89.6811				113.122	78.3996
																81.9966	52.9526									64.3024				161.964	46.2308
																56.6757	61.9789									44.4456				126.945	25.7186
																30.8808	130.456									24.217				152.829	47.2441
																91.6253	111.692									71.8533				50.1438	89.0841
																52.0737	155.244									40.8366				149.13	15.5695
																24.837	131.443									19.4774				53.8261	36.6337
																71.4495	175.982									56.0313				42.878	30.2164
																45.2596	34.0114									35.4929				43.2981	57.319
																64.0923	30.4265									50.2617				100.147	32.3418
																33.8632	129.666									26.5558				147.301	36.2713
																26.2887	79.034									20.6158				178.135	36.1065
																	142.01									36.8405	47.2955			80.1625	34.5907
																	100.731									43.2452	52.4766			71.2245	30.4389
																	49.5752									25.1308	76.5774			133.198	46.3379
																28.1552	34.7026									69.4602	13.2895			192.774	40.349
																121.469	28.2045									72.558	48.4107			123.98	98.3105
																125.814	11.5346									95.0247	46.916			115.033	39.8794
																98.0937	44.5387									44.4998	28.3603			136.567
																82.0954	32.0066									40.3565	33.8511		n=	67	53
																42.5339	28.9156									52.1591	49.2859
																34.9792	34.8903									32.3022	66.1611			D'Agostino & Pearson test
																30.5648	31.503									40.6972	69.2666			p-value
																44.0054	44.5486									64.2172	25.2935			0.0082	< 0.0001
																118.605	101.224									35.6943	23.7213
																49.0419	25.4888									69.375	50.6644			One sample Wilcoxon test
																73.5333	28.0367									61.437	69.2821			p < 0.0001
																41.6846	19.9091									36.5772	25.642
																26.9405	27.928									39.7989	31.8376
																33.2114	25.627									158.684	21.003
																58.9372	36.7864									65.4021	44.0661
																44.4202	30.7327									52.7321	52.3604
																72.4173	27.296									84.4923	51.6789
																51.0664	17.0946									62.738	69.0343
																60.7247	29.992									71.59	22.6991
																57.6929	27.375									84.1825	43.16
																57.2189	47.3927									60.2366
																63.0059	47.5606									55.8919
																36.6876	22.7434									100.291
																40.1441	20.5016									75.8029	133.67
																49.6345	16.186									86.0412	79.6907
																68.2301	31.6709									32.8443	126.003
																20.1757	24.2543									48.7283	45.7079
																22.5755	30.3772									75.8184	50.5405
																27.77	56.4387									119.497	49.0303
																24.7975	55.7968									110.591	25.4716
																46.1583	69.0498									247.204	37.8473
																35.0878	40.2823									111.908	154.193
																55.5203	54.5327									118.026	48.4107
																27.7601	47.6396									132.895	41.4485
																70.699	15.7317									52.0661	91.3848
																55.0463	39.512									97.0383	32.5578
																133.616	21.1732									85.9637	120.659
																84.5149	29.0933									123.834	55.4969
																52.133	36.5296									96.109	38.9857
																44.4696	18.013									163.563	62.2888
																28.1749	50.8788									48.5656	152.953
																28.1749	50.8788									54.9393	39.7524
																42.0204	46.9384									47.5666	26.2383
																38.88	40.3218									53.0419	23.2954
																62.8282	48.4494									84.5697	121.975
																36.974	253.209									40.5191	77.0576
																19.1092	168.18									197.329	154.502
																20.0572	301.007									140.252	72.4573
																27.6416	381.591									72.953	94.0954
																27.928	168.082									146.525	78.6064
																41.9809	104.977									161.472	150.32
																44.0054	159.194									266.565	182.77
																33.9817	122.457									111.753	80.5426
																72.5161	447.263									128.094	118.878
																56.6165	238.297									198.646	69.7003
																60.7839	105.767									66.8813	72.4109
																114.556	173.217									151.714	78.2192
																149.417	171.933									181.453	87.1254
																142.01	228.224									57.5027
																161.959	192.474									80.0779	100.523
																140.035	209.559									197.949	48.434
																108.631	217.064									369.179	106.254
																67.4697	150.997									198.336	18.8733
																52.9922	187.833									148.617	94.1728
																156.132	122.16									186.565	97.2707
																183.488	146.652									237.291	137.31
																183.488	280.959									385.443	120.659
																113.174	118.309									127.629	91.6172
																72.5852	217.558									200.814	35.702
																78.3624	317.005									65.5415	171.153
																36.5	140.529									137.929	55.6441
																90.9043	291.822									158.994	83.9501
																112.976	261.801									162.247	88.6743
																170.156	222.101									335.026	67.6403
																97.442	590.755									109.042	20.5616
																165.514	292.118									91.8495	13.4599
																85.3839	436.894									158.452	51.6402
																83.4878	227.434									226.991	67.1834
																205.708	616.925									306.759	47.8144
																166.502	334.682									138.471	127.474
																332.213	163.638									77.9095	28.3603
																191.882	142.998									102.072	48.8057
																286.292	252.32									247.591	75.044
																190.598	163.243									173.941	62.9316
																127.691	278.095									90.1457	122.672
																310.586	234.84									157.987	34.4939
																234.742	223.187									343.235	13.3515
																339.126	199.486									177.503	52.8096
																98.4986	233.952									164.803	20.1279
																95.8816	161.268									110.359	115.005
																103.594	164.526									427.418	58.0603
																62.4529	147.047										45.1038
																	165.415										46.3275
																	139.443										17.5722
																	90.2624										119.807
																60.64	167.7										103.156
																73.29	232.7										45.2123
																145.7	183										55.3033
																55.24	152.9										45.5995
																161.1	308.8										75.6326
																169.8	87.13										95.7992
																148	167.3										95.7992
																139.6	122.8										49.5879
																149.3	185.6										40.6662
																210.9	210.5										35.0283
																138.3	352.5										31.1406
																99.9	221.8										54.8774
																170.6	185										52.2985
																130.9	81.15										77.2744
																185.5	96.95										51.1678
																153.9	212.7										32.7746
																111.7	125.6										117.484
																116.2	137.6										52.252
																169	192.8								n =	155	158
																115.3	153.8
																251.4	181.9									D'Agostino & Pearson test
																186.8	97.62									p-value
																94.89	69.45									< 0.0001	< 0.0001
																126.2	154.2
																264.5	154.2									One sample Wilcoxon test
																171.8	127.6									p < 0.0001
																103.5	174.9
																167.5	147.9
																106.7	39.77
																239.9	99.21
																230.4	257.1
																195.2	301.6
																95.54	152.8
																169.4	164.9
																170.1	237.2
																136	119.1
																162.6	224.6
																231.6	229.3
																121.6	240.9
																121.6	274.7
																99.44	323.2
																104.1	235.1
																217.3	144.7
																184.7	257.3
																57.97	233.2
																103	331.8
																133.1	136.4
																170	104.2
																95.16	101.9
																155.4	130.3
																42.22	71.63
																75.82	110.9
																115.7
																82.13
															n =	207	211
																D'Agostino & Pearson test
																p-value
																< 0.0001	< 0.0001
																One sample Wilcoxon test
																p = 0.0001
