# Supplementary material for: Rho GTPase signaling and mDia facilitate endocytosis via presynaptic actin
Source: eLife journal article supplement (doi:10.7554/elife.92755), 2023-12-05
Supplement: fig4-figsupp1-data1 [file elife-92755-fig4-figsupp1-data1-v1.zip]

## Sheet: Figure 4 S1
	Figure 4 S1C			Figure 4 S1D																										Figure 4 S1E			Figure 4 S1F						Figure 4 S1H
					norm. ΔF [vGLUT1-pH; 40Hz5s]																									Postsynaptic F-Actin			Basson			Homer				norm. ΔF [vGLUT1-pH; 20Hz2s]
	presynaptic F-Actin			time [s]	shCTR						shmDia1						shmDia1 + mDia1-WT						shmDia1+ mDia1-K994A							shCTR	shmDia1+3		shCTR	shmDia1+3		shCTR	shmDia1+3		time [s]	shCTR + DMSO					shCTR + Jasp
	WT	K44A		0	-0.02007	-0.06051	-0.05632	-0.13147	-0.04343	-0.03954	-0.01386	-0.10392	0.0462805	-0.0383707	-0.03343	-0.05732	0.031311	-0.02276	-0.03296	-0.156039	-0.06665	0.00787	-0.00546	-0.01672	-0.04465	-0.0255	-0.00904	-0.03708		113.912	38.0855		82.1942	130.32		83.9323	170.03		0	-0.0619051	-0.0697318	-0.0844822	-0.12706	0.022687	0.00128218	-0.111486	-0.0718094	-0.11848	0.024412
	144.462	106.318		2	-0.00317	-0.00526	-0.08684	-0.07812	-0.03605	-0.00339	-0.01951	-0.0264881	-0.0918241	-0.0368623	-0.00767	-0.02667	-0.0954069	0.003615	-0.09871	-0.0961178	-0.00174	0.007498	0.016396	-0.0104	-0.05663	-0.02901	-0.02971	0.001007		153.239	52.6987		89.8059	65.0678		207.557	86.5015		2	-0.0761988	-0.103832	-0.0801013	-0.14917	-0.00354	-0.00421252	-0.129325	-0.111863	-0.10651	0.024182
	79.7723	144.193		4	-0.01151	-0.05207	-0.11297	-0.04683	0.027378	-0.05437	-0.01703	-0.0911114	-0.148713	-0.0311233	-0.0163	-0.07211	-0.09267	-0.06796	-0.0365	-0.0855898	-0.03854	-0.02354	-0.01397	-0.02899	-0.04114	0.008682	-0.01041	-0.05151		187.806	139.233		79.1249	88.0257		76.2102	303.398		4	-0.0811967	-0.105614	-0.0568144	-0.21101	0.009872	-0.0237477	-0.192711	-0.141927	-0.1529	0.009872
	172.482	197.286		6	-0.00454	0.038275	-0.01636	0.028044	0.089287	0.032352	-0.01578	-0.0602454	-0.133904	0.00479348	0.000282	0.086085	0.0332653	-0.0141	0.079373	-0.10175	0.01853	-0.02821	0.004751	-0.00188	0.006628	-0.03186	-0.01344	-0.00689		123.088	55.5137		134.555	104.17		91.2358	35.2328		6	-0.0992129	-0.152495	0.00396463	0.480487	-0.02132	-0.0244558	-0.2019	-0.142367	-0.11297	-0.01217
	152.64	77.4931		8	0.039289	0.26326	0.272486	0.228384	0.006405	0.211906	0.066181	0.281765	0.328161	0.101563	0.057119	0.162498	0.1235	0.101211	0.0888	0.439496	0.088407	0.036385	-0.00172	0.057989	0.135791	0.077685	0.058331	0.094475		248.935	68.2986		142.904	59.9975		133.368	201.351		8	0.318514	0.431673	0.217433	0.894712	-0.00771	0.0511338	0.635422	0.467966	0.408022	-0.0463
	150.428	77.1579		10	0.407521	0.506189	0.647009	0.621666	0.320828	0.499871	0.357681	0.509903	0.733155	0.440399	0.06419	0.50853	0.521453	0.530594	0.724869	0.80036	0.031998	0.372319	0.340591	0.392407	0.618109	0.704834	0.090517	0.546592		167.728	66.7669		76.0557	103.924		211.455	37.5278		10	0.702262	0.830753	0.750303	1	0.564511	0.629414	0.95147	0.831149	0.884026	0.567126
	160.215	59.9834		12	0.775526	0.812445	0.88521	0.8353	0.68909	0.791349	0.7567	0.805723	0.947296	0.883945	0.420752	0.807206	0.930247	0.910215	0.975523	0.914036	0.3063	0.796645	0.697611	0.758096	0.85715	1	0.371802	0.795617		228.72	30.1096		79.4319	57.3456		73.872	16.2235		12	0.969481	0.925795	0.953226	0.784347	0.982987	1	0.972335	0.992675	1	0.997142
	238.177	102.832		14	0.990165	0.959349	0.943962	0.915944	0.944742	0.944184	0.990672	1	1	0.964518	0.799484	0.897681	1	1	0.888757	1	0.692501	0.996849	1	1	0.975969	0.939254	0.749371	0.949851		299.233	87.3482		79.2477	81.3962		134.739	92.5493		14	0.957639	0.967079	0.964636	0.590622	0.991018	0.825418	0.985133	0.934977	0.819789	0.879907
	100.352	94.5201		16	0.96429	0.79311	0.921538	0.963315	0.91219	0.834488	0.923797	0.827884	0.685366	1	0.977241	0.784612	0.953977	0.901244	0.826408	0.933842	0.999746	0.953912	0.884421	0.973131	0.935319	0.941786	0.973669	0.976777		137.922	174.214		69.7945	97.6017		110.534	245.23		16	0.873	0.964454	0.963902	0.343103	0.789288	0.59275	0.935222	0.849812	0.555037	0.723203
	53.6754	170.471		18	0.839358	0.648836	0.71789	0.733496	0.747756	0.678318	0.754212	0.819603	0.589903	0.817777	0.755206	0.686721	0.685916	0.711858	0.550182	0.479654	0.834803	0.788003	0.80861	0.862987	0.915506	0.811365	0.822807	0.764032		369.471	77.9648		65.0065	120.498		128.865	92.2028		18	0.597328	0.521493	0.762554	0.219238	0.559146	0.377434	0.465016	0.559643	0.313008	0.514276
	168.661	137.691		20	0.717413	0.492668	0.734937	0.847082	0.659747	0.511364	0.660488	0.642802	0.381812	0.760622	0.700278	0.68293	0.620579	0.6319	0.445924	0.540346	0.770172	0.672847	0.702239	0.813053	0.842328	0.765372	0.728082	0.732319		53.8647	108.875		58.8127	61.7531		89.5037	47.1407		20	0.470513	0.488934	0.653655	0.164569	0.373861	0.249434	0.426923	0.475838	0.232218	0.406039
	89.6935	141.512		22	0.624415	0.419697	0.644197	0.700787	0.582358	0.449093	0.596061	0.693488	0.687016	0.775212	0.574015	0.493072	0.471313	0.567874	0.57251	0.441335	0.631766	0.585407	0.635163	0.786967	0.724819	0.671081	0.671072	0.692798		164.071	36.9885		76.2399	71.5132		49.4212	62.4404		22	0.338331	0.450412	0.586966	0.107612	0.198452	0.192038	0.452182	0.434011	0.143646	0.243248
	86.3418	144.261		24	0.569884	0.472234	0.553033	0.614957	0.369006	0.504715	0.525898	0.616731	0.499739	0.662109	0.533366	0.487291	0.479801	0.463656	0.487284	0.46138	0.578299	0.587059	0.630511	0.754086	0.727639	0.666153	0.563426	0.64269		142.407	77.1369		50.268	119.271		61.0837	53.2028		24	0.352197	0.340108	0.507638	0.008617	0.208187	0.135506	0.337899	0.408062	0.131546	0.166103
	80.7778	131.323		26	0.476649	0.41748	0.511726	0.635501	0.285803	0.447083	0.461436	0.514507	0.520002	0.586023	0.442746	0.433253	0.410653	0.383313	0.294289	0.297388	0.471523	0.536298	0.522696	0.649744	0.713392	0.605489	0.526582	0.563123		145.166	76.102		150.884	61.6303		189.371	80.959		26	0.273819	0.37461	0.474096	-0.0081	0.109349	0.119995	0.266785	0.360479	0.082621	0.062833
	98.4082	77.359		28	0.434519	0.236004	0.5701	0.621704	0.285421	0.305869	0.391054	0.602766	0.355469	0.653619	0.401368	0.505003	0.34244	0.284669	0.256347	0.345619	0.424825	0.460278	0.490711	0.627639	0.699402	0.594072	0.482515	0.533502		280.604	42.0251		65.3134	77.5289		95.6669	63.4075		28	0.233409	0.313831	0.419933	0.016811	-0.08127	0.0843837	0.248738	0.380083	0.087504	-0.01294
	131.524	154.45		30	0.365733	0.432201	0.475892	0.588374	0.148732	0.425033	0.362166	0.54019	0.434277	0.485273	0.339276	0.380284	0.290857	0.20406	0.153319	0.223766	0.384469	0.413529	0.442487	0.594439	0.674623	0.543114	0.448209	0.470145		152.273	48.9661		52.9259	110.308		82.1714	50.0418		30	0.19506	0.240165	0.405082	-0.04216	-0.08344	0.0641621	0.348111	0.380399	0.04538	0.036441
	131.792	124.351		32	0.359995	0.252724	0.447739	0.514291	0.203414	0.289255	0.318971	0.443669	0.239534	0.514491	0.316191	0.433635	0.242757	0.176867	0.353859	0.313944	0.364524	0.338112	0.376874	0.577712	0.595239	0.467442	0.399385	0.512775		92.8679	18.2838		115.342	49.7094		189.66	32.3894		32	0.159302	0.124446	0.359528	-0.10355	-0.18425	0.0688653	0.323415	0.348645	0.008667	-0.0703
	89.8946	77.7612		34	0.341874	0.275208	0.423963	0.505101	0.256489	0.30721	0.273557	0.49484	0.111241	0.481007	0.29295	0.32479	0.282374	0.108354	0.233445	0.219269	0.309139	0.356959	0.369189	0.523923	0.535841	0.480761	0.317517	0.452215		253.972	49.9113		144.131	71.9429		141.812	31.5233		34	0.182494	0.155024	0.352519	-0.12153	-0.2051	0.0513938	0.294412	0.345032	-0.0025	-0.14844
	109.871	139.769		36	0.293417	0.300923	0.381611	0.506561	0.187438	0.314917	0.259554	0.392912	0.347264	0.415246	0.281532	0.333797	0.234615	0.087102	0.24225	0.133286	0.286347	0.292345	0.341486	0.515565	0.536673	0.441449	0.313081	0.435728		93.6958	19.9673		65.1292	99.1978		144.626	22.1847		36	0.121876	0.127937	0.317596	-0.07557	-0.28723	0.046966	0.210451	0.335249	0.001688	-0.14671
	39.8995	92.8442		38	0.298096	0.22498	0.456337	0.505343	0.124887	0.258632	0.239254	0.385102	0.183375	0.357395	0.204628	0.318843	0.204238	0.103727	0.134293	0.161495	0.289267	0.236364	0.345035	0.483217	0.473464	0.426989	0.278403	0.407919		408.315	60.9092		116.447	121.665		248.405	59.9578		38	0.166035	0.107634	0.304236	-0.13993	-0.30605	0.0347191	0.22501	0.295798	0.021283	-0.22609
	58.2338	123.211		40	0.231568	0.161003	0.391329	0.38405	0.117348	0.221025	0.224525	0.461216	0.245629	0.372343	0.262352	0.284622	0.152537	0.055804	0.135752	0.14738	0.226027	0.260541	0.316215	0.453943	0.494888	0.367696	0.27746	0.367709		193.325	100.181		166.598	90.0514		298.779	36.6906		40	0.074509	0.0391757	0.294858	0.021143	-0.32033	0.0231558	0.122282	0.304148	-0.04307	-0.2378
	54.6004	102.766		42	0.245222	0.091115	0.313225	0.348361	0.258144	0.136868	0.196411	0.369863	0.334457	0.347931	0.237395	0.276438	0.0652176	-0.0023	0.147571	0.148435	0.209367	0.28891	0.301289	0.426112	0.426633	0.356012	0.240706	0.346173		87.1412	51.4775		106.38	101.224		72.0389	124.78		42	0.0456331	-0.00594889	0.269504	-0.00646	-0.33681	0.0222087	0.190923	0.308921	-0.05607	-0.23725
	70.3873	123.278		44	0.227748	0.225604	0.38271	0.437601	0.125927	0.252453	0.170904	0.385127	0.188945	0.383362	0.229627	0.204595	0.0712137	-0.05729	0.154435	0.141742	0.184809	0.272199	0.266703	0.419973	0.442626	0.329376	0.202132	0.367016		184.77	37.7888		112.948	69.9786		49.2336	121.33		44	0.0751809	0.0200452	0.225669	-0.06629	-0.3823	0.0173729	0.0761751	0.312445	-0.03561	-0.32035
	59.7421	18.7833		46	0.210411	0.1907	0.303129	0.326558	0.119846	0.223676	0.164986	0.380034	0.203353	0.29468	0.156519	0.212991	0.144199	-0.02728	0.204554	0.213141	0.15967	0.22018	0.269533	0.388024	0.382954	0.296562	0.238066	0.344829		236.309	112.325		99.873	171.263		94.4112	134.393		46	0.158494	0.027556	0.235534	-0.13751	-0.45783	0.0155017	0.299385	0.273181	-0.03522	-0.36828
	103.905	41.6492		48	0.212687	0.148085	0.2198	0.331433	0.214931	0.20632	0.156374	0.399103	0.348089	0.328176	0.206077	0.309418	0.117651	-0.03117	0.108833	0.0999378	0.182755	0.169671	0.265795	0.348944	0.374626	0.24257	0.1937	0.313116		138.543	85.6923		88.8237	96.2513		95.3783	102.566		48	0.090898	-0.0440054	0.232395	-0.10963	-0.49515	0.00221059	0.167492	0.271539	-0.02118	-0.30713
	30.4274	116.776		50	0.173478	0.160094	0.250619	0.256042	0.010407	0.20733	0.140234	0.300981	0.304704	0.346878	0.212312	0.248231	0.10077	-0.08977	0.286789	0.0424819	0.124432	0.180269	0.237482	0.357443	0.366658	0.237813	0.171784	0.274415		179.388	52.7125		149.288	66.2955		93.4153	44.2395		50	0.0945173	-0.0322221	0.215981	-0.09049	-0.51304	0.0146628	0.348658	0.248737	-0.06699	-0.38074
	157.869	182.069		52	0.114136	0.159425	0.241614	0.176445	0.087045	0.189018	0.12848	0.316597	0.281502	0.277943	0.213908	0.249939	-0.0115503	-0.02251	0.207446	0.127505	0.149442	0.268855	0.219182	0.351072	0.364413	0.249615	0.163251	0.293008		193.049	55.5206		97.1107	95.6374		123.192	121.576		52	0.0672861	-0.0735168	0.197325	-0.15019	-0.52842	0.002092	0.0806496	0.266784	-0.02608	-0.37971
	49.8007	110.542		54	0.139704	0.226475	0.26035	0.285899	0.015841	0.226222	0.114868	0.359219	0.325751	0.278894	0.187179	0.211425	0.14264	-0.08871	0.101706	0.122633	0.111592	0.131567	0.23061	0.309645	0.285579	0.243047	0.173539	0.274104		118.12	51.9881		197.536	45.5229		179.267	52.8564		54	0.0855909	-0.0589945	0.19348	-0.14173	-0.55959	0.0110065	0.194431	0.25112	-0.08153	-0.44454
	114.631	177.912		56	0.10741	0.282475	0.188154	0.20028	-0.012	0.300292	0.120719	0.375921	0.157921	0.17885	0.215111	0.270574	0.0820275	-0.0287	0.187127	-0.00264643	0.13609	0.135899	0.186695	0.303917	0.30627	0.212187	0.158318	0.275883		255.559	58.4391		84.4654	141.124		93.9493	115.687		56	0.0759947	-0.0801416	0.160169	-0.15192	-0.57899	0.00539067	0.202711	0.224119	-0.09142	-0.45249
	79.3701	182.94		58	0.113159	0.153222	0.223977	0.202694	-0.01757	0.163059	0.1035	0.145657	0.291676	0.178539	0.205414	0.14638	0.0701151	-0.01652	0.086819	0.0439485	0.131484	0.15411	0.179912	0.290539	0.271293	0.202486	0.180864	0.226763		264.183	39.7828		102.206	86.9208		173.061	77.899		58	0.0679821	-0.0875916	0.152199	-0.0845	-0.61377	-0.00509698	0.0644225	0.207308	-0.04896	-0.48866
	121.468	210.827		60	0.119545	0.129835	0.163939	0.138667	0.087162	0.146211	0.100202	0.379306	0.318882	0.224692	0.173273	0.214821	0.0680875	-0.02981	0.076367	0.106002	0.073832	0.182598	0.173427	0.286594	0.28005	0.170909	0.147723	0.266127		119.638	100.94		100.057	72.3112		202.506	80.5259		60	0.0511095	-0.0846345	0.162153	-0.13252	-0.61271	-0.0109181	0.101318	0.209935	-0.05578	-0.45413
	60.7074	187.632		62	0.073436	0.133272	0.204974	0.204308	0.059028	0.15602	0.087416	0.219492	0.335813	0.19779	0.159274	0.160791	-0.0104876	-0.02289	0.091044	0.0939185	0.097904	0.130929	0.153951	0.270963	0.28453	0.151382	0.10853	0.236574		230.583	76.102		128.049	79.7388		62.4693	52.943		62	0.0545916	-0.0989774	0.151054	-0.09806	-0.65884	0.00570277	0.0448867	0.203505	-0.07737	-0.4852
	78.5656	195.744		64	0.021326	0.095251	0.099156	0.126216	-0.07072	0.115785	0.080543	0.214973	0.0634708	0.286779	0.14812	0.144799	0.0964248	-0.02518	0.048444	0.121461	0.08068	0.098327	0.187345	0.255253	0.25121	0.196282	0.146739	0.230925		86.6583	46.8617		320.428	76.9151		19.2979	14.3154		64	0.0746818	-0.0624543	0.114656	-0.14258	-0.7086	-0.00225002	0.0429564	0.206545	-0.13255	-0.48506
	79.6382	144.596		66	0.059733	0.246255	0.095649	0.123166	0.048756	0.223049	0.070805	0.219283	0.315637	0.169217	0.135107	0.18812	0.130069	-0.05843	0.134898	0.0383224	0.085052	0.177934	0.186462	0.281013	0.2779	0.157379	0.136935	0.223351		157.517	271.704		306.187	101.469		20.2794	28.117		66	0.0734769	-0.160424	0.121904	-0.12615	-0.71812	-0.0125893	0.246134	0.217507	-0.11817	-0.48923
	83.9285	140.305		68	0.080538	0.089637	0.15423	0.109901	0.065567	0.112779	0.058633	0.315522	0.258568	0.175229	0.191778	0.157306	0.0826956	-0.03608	0.141321	0.0736527	0.123146	0.141773	0.153067	0.227141	0.226496	0.162734	0.113976	0.220701		53.7681	36.1122		212.821	106.687		19.168	26.7458		68	0.082544	-0.14388	0.0952238	-0.1012	-0.65965	-0.00929538	0.134525	0.164527	-0.11465	-0.53217
	120.932	99.3466		70	0.026946	0.00868	0.109843	0.087511	-0.02365	0.023628	0.067375	0.23089	0.117231	0.143749	0.132913	0.098941	0.0481977	-0.07406	0.179113	0.00331542	0.054073	0.089242	0.147299	0.214273	0.27385	0.138046	0.115724	0.258104		337.664	116.602		275.986	215.645		141.206	94.0071		70	0.0833021	-0.165029	0.058302	-0.09862	-0.72589	-0.0103868	0.0884245	0.16313	-0.09263	-0.591
	44.8602	168.594		72	0.055351	0.08681	0.033099	0.066246	-0.05973	0.101738	0.064894	0.145427	0.157289	0.220994	0.161457	0.188047	-0.00861321	-0.05861	0.152344	0.0168497	0.063763	0.067059	0.168505	0.229864	0.267493	0.098533	0.094251	0.209575		134.265	156.413		306.924	129.154		116.495	108.181		72	0.0900792	-0.123471	0.0939133	-0.11247	-0.73074	-0.011961	0.0941909	0.153985	-0.15868	-0.56045
	44.8602	98.0059		74	0.051716	0.118616	0.10421	0.043878	0.118634	0.14643	0.043678	0.150622	0.266031	0.135691	0.167704	0.199094	0.0172959	-0.11768	0.096284	-0.0543494	0.063089	0.144678	0.146637	0.211249	0.268036	0.088971	0.11338	0.193564		117.844	77.0679		221.783	54.6017		85.0293	98.4238		74	0.0127637	-0.127107	0.0484073	-0.1669	-0.77271	-0.0116053	0.257357	0.140593	-0.12835	-0.68765
	105.648	100.084		76	0.029317	0.167846	0.068416	0.056317	-0.06566	0.172219	0.042227	0.143034	0.235197	0.168219	0.178942	0.153619	-0.0525395	-0.04761	0.023425	0.0310907	0.082551	0.075848	0.165977	0.208072	0.250552	0.065596	0.096678	0.191148		185.598	47.869		210.55	90.7267		147.513	119.382		76	0.0150884	-0.107743	0.062515	-0.11529	-0.7517	-0.0455969	0.078549	0.125137	-0.11169	-0.61652
	51.8922	101.559		78	0.040887	0.080134	0.024027	-0.00406	-0.10613	0.119706	0.035187	0.178539	0.109062	0.17434	0.158	0.214163	-0.0807228	-0.09543	0.086867	0.0248943	0.054341	0.090982	0.112587	0.194516	0.211141	0.069727	0.094484	0.187402		79.8277	60.3296		257.693	71.3905		87.0211	172.916		78	0.040372	-0.213613	0.0479583	-0.09301	-0.89104	-0.0360953	0.117136	0.138958	-0.1198	-0.59092
	77.1579	101.559		80	0.073849	0.089283	0.068624	-0.00102	-0.0462	0.123979	0.061092	0.19743	0.17195	0.16573	0.140852	0.172198	0.101679	-0.10939	0.139979	0.0388235	0.047637	0.116034	0.105999	0.173513	0.242318	0.100695	0.09618	0.181383		201.053	85.2094		156.654	65.0065			94.2524		n =	5	9	5	6	7	5	9	6	8	7
	93.3805	118.385		82	0.051176	0.161775	0.031913	0.011664	0.048008	0.179861	0.013236	0.191601	0.145344	0.0961431	0.132155	0.194616	-0.0557966	-0.11409	0.104308	0.053145	0.053411	0.099127	0.083794	0.168665	0.169993	0.062913	0.100075	0.162391		93.1438	57.556		196.615	104.354			45.5096			32					35
	41.4414	103.235		84	-0.00964	0.131753	0.074903	-0.01241	0.003536	0.143731	0.039723	0.229013	0.306088	0.0938252	0.156989	0.208304	-0.0174367	-0.05779	-0.01681	0.00806553	0.06664	0.081919	0.120765	0.17557	0.188437	0.070172	0.089936	0.187107		49.5387	57.556		158.373				45.5096
	108.262	139.3		86	0.045118	0.093614	-0.07183	-0.10194	-0.03338	0.114493	0.012487	0.146122	0.147831	0.0823936	0.142296	0.217466	-0.0879647	-0.10304	0.092712	0.0190779	0.091256	0.093695	0.094119	0.12917	0.183145	0.058692	0.069074	0.172942		135.024	84.7954		195.265				144.915
	174.896	55.0496		88	0.080223	0.073641	0.030612	-0.10301	-0.15582	0.102296	0.017223	0.140532	0.0848314	0.139643	0.153533	0.178574	-0.0364214	-0.12632	0.06717	0.0535757	0.053196	0.052571	0.066913	0.134208	0.255391	0.020507	0.078394	0.154324		102.734	32.3382		255.974				90.2832
	74.6105	57.3891		90	0.064372	0.062904	0.022972	-0.05409	0.138541	0.088641	0.023874	0.164099	0.184991	0.137618	0.141857	0.212752	-0.0672902	-0.13211	0.097944	-0.0403346	0.021361	0.050833	0.100858	0.140269	0.16689	0.004095	0.044111	0.193816		99.3534	39.7759		333.319	104.354			133.671
	140.775	61.009		92	0.039292	0.176724	0.039834	-0.05641	-0.07312	0.20339	0.010103	0.259757	0.258488	0.111614	0.115747	0.138572	-0.0659227	-0.12295	0.027808	-0.0581283	0.067804	0.031259	0.089853	0.152791	0.13496	0.038665	0.083829	0.196389		100.733	54.1269		235.717	118.35			143.269
	84.2637	108.195		94	0.013475	0.106486	0.025842	0.006908	-0.0725	0.133303	0.014052	0.191452	0.206126	0.176673	0.118602	0.122131	-0.120139	-0.14393	0.064449	0.0448997	0.086917	0.103271	0.100467	0.138705	0.195446	-0.0017	0.081664	0.184651		65.6629	30.082		289.245	107.116		161.947	87.7717
	89.8276	109.938		96	-0.0006	0.045563	-0.03686	-0.16977	0.057105	0.090375	0.007518	0.21267	0.149109	0.146041	0.158645	0.17113	-0.127508	-0.14937	0.019786	-0.0461881	0.048364	0.075036	0.080185	0.144116	0.156137	0.017417	0.058641	0.145201		85.6923	58.9635		308.458	83.1149		192.546	83.4271
	106.922	136.35		98	0.05641	0.066052	0.054927	0.012472	0.057105	0.069305	-0.1008	0.247268	0.191944	0.11984	0.10016	0.1706	-0.0952013	-0.13644	0.211313	-0.0351483	0.03774	0.120844	0.088715	0.126562	0.181618	0.041245	0.088845	0.154138		21.2506	78.9308		266.901	83.4219		135.114	104.284
	126.764			n =	3	5	3	3	2	5	8	2	1	1	4	5	2	3	3	1	3	4	4	4	3	4		4		27.0462	54.81		160.889	57.7569		160.648	92.7658
	133.602				21						21						16						19							94.1788	145.856		63.5946	44.4487		186.917	79.4434
	39.6113																													72.9282	71.5483		88.6396	76.1171		133.584	134.725
	103.637																													70.0994	20.8435		71.8202	53.2942		283.046	58.1103
	154.316																													109.91			57.3334	98.5839		174.36	180.855
n =	54	49																												225.822			37.0334	91.2177		81.06	155.74
																														254.593			52.2384	33.3933		120.839	85.0293
	D'Agostino & Pearson test																													131.022			59.5002	103.004		30.3686	107.546
	p-value																													166.831			106.011	182.067		116.004	72.6595
	0.0735	0.949																												160.069			77.4676	192.994		244.363	151.699
																														961.796			63.3491	81.3962		205.681	129.442
	One sample t-test																													241.553			53.5275	171.141		141.913	50.4604
	p = 0.0022																													140.337			116.324	110.984		117.722	64.9519
																														228.444			78.6953	59.2424		139.776	129.327
																														78.7928			104.845	67.5846		91.6399	148.379
																														105.908			74.9508	191.766		139.401	99.9826
																														154.274			129.952	110.063		108.397	111.385
																														112.945			65.3134	84.1585		41.1506	91.0626
																														78.2408	188.633		50.9555	93.1821		117.549	66.0056
																														34.1734	160.345		81.519	100.978		69.1666	109.495
																														53.3404	68.4573		147.692	159.723		103.144	66.9438
																														119.983	115.015		137.809	143.825		42.2187	40.8764
																														53.4853	107.081		64.1471	74.7666		50.2584	48.8294
																														57.0385	47.6965		54.9393	182.558		62.426	96.1288
																														39.9415	62.3926		144.131	156.715		76.3834	109.711
																														69.4094	151.031		75.0122	101.53		24.5374	98.5104
																														36.1191	92.8679		221.599	157.759		71.1151	75.8927
																														35.9121	290.264		152.234	149.595		50.7202	62.7435
																														41.3628	273.705		140.019	143.395		164.833	47.6891
																														44.9505	312.894		152.602	96.3127		73.0637	167.287
																														55.0652	128.538		162.547	112.518		65.9334	136.659
																														40.7349	234.998		153.953	80.4754		143.486	157.761
																														71.4103	177.732		153.953	191.889		82.4889	93.4153
																														41.418	99.6294		88.7623	131.118		31.5811	110.996
																														118.396	106.391		99.9958	226.755		66.5252	113.146
																														89.3491	290.678		160.889	113.439		52.8853	150.544
																														27.0738	130.401		115.465	194.16		55.3679	89.8501
																														51.9536	124.882		110.554	190.109		105.366	73.5977
																														25.1695	114.049		125.47	105.95		135.417	245.23
																														25.1695	437.086		125.47	97.6017		65.4571	50.7202
																														26.0113	37.8785		86.6753	204.657		70.6966	81.2332
																														29.6887	315.654		84.2199	255.361		138.145	62.1229
																														28.295	91.35		122.708	117.552		112.872	34.2513
																														45.3438	149.651		94.6553	71.4518		326.059	73.1936
																														46.7927	70.9273		125.102	117.245		43.3301	76.0948
																														118.603	240.104		105.827	105.889		91.409	127.941
																														118.603	162.76		65.9272	89.6831			97.1392
																														72.9282	376.094		149.533	104.845			75.8205
																														84.6574	176.697		149.84	100.61			122.672
																														74.5841	73.0662		117.613	101.899			63.0033
																														79.6207	371.54		169.422	145.113			84.8994
																														119.086	107.357		139.405	82.5625			107.95
																														87.5552	43.7431		71.5746	79.9843			150.833
																														61.0334	34.0768		116.447	104.784		60.5929	87.4541
																														55.4033	49.8078		142.413	208.524		82.0271	51.0089
																														90.729	99.6294		139.589	290.595		71.808	124.303
																														67.512	39.5758		99.5047	160.889		71.808	147.946
																														105.011	34.2907		120.56	75.7488		42.4497	167.143
																														137.439	70.9963		97.479	160.398		65.5581	129.832
																														164.002	64.7453		111.045	189.74		76.2247	72.6595
																														164.002	32.49		96.8651	137.379		180.999	104.616
																														76.033	27.3912		74.5211	63.0421		110.086	44.5426
																														53.3749	41.8112		61.6917	62.9808		85.6499	53.0874
																														126.055	30.2338		59.9361	82.9308		85.6499	97.5866
																														79.2758	34.684		81.7645	108.406		44.456	53.8235
																														67.2015	29.9854		55.2217	110.554		65.0241	81.1899
																														105.908	27.4395		53.859	109.326		131.116	50.4604
																														40.4175	44.847		31.7482	60.8753		146.936	39.4619
																														81.6216	36.9402		52.7909	66.1114		188.794	88.0748
																														21.4162	30.7789		59.0399	63.1035		143.962	68.8923
																														105.701	68.0226		31.4474	93.1821		74.7524	35.6947
																														34.1389	57.5974		47.8249	57.2843		120.796	70.6244
																														24.997	38.5271		74.2142	25.1125		67.4778	14.5637
																														53.7612	23.1342		50.6486	39.4274		50.2006	43.8353
																														63.4758	27.9983		54.2703	33.467		59.4238	52.4234
																														40.7625	22.2855		71.6974	76.7923		87.05	46.0148
																														33.7181	14.6132			57.4438		85.8376	36.7772
																														24.8177	39.7966			27.617		85.8376	28.7521
																														51.788	66.6772			61.4461		72.0389	74.406
																														53.6578	30.358			59.5616		45.5674	44.3982
																														29.2886	21.8095			77.8972		136.457	47.6025
																														54.8721	75.067		28.7772	52.1279		108.672	77.6392
																														80.7936	15.9517		65.0678	88.8851		106.969	77.6392
																														62.8341	15.9517		53.7915	78.02		99.6074	83.1962
																														59.0394	15.1031		92.8137	78.02		79.4001	77.6825
																														31.1445	19.3532		39.4765	94.287		60.5641	115.066
																														89.97	56.1209		76.7923	269.049		34.1791	49.1758
																														33.6629	74.3771		47.7942	62.6124		45.6828	57.6196
																														31.6758	42.4322		50.6117	39.6852		97.0382	38.0618
																														91.4879	87.7622		60.2491	54.3562		84.8705	58.0959
																														24.0104	21.9612		42.5212	28.9368		77.0618	49.4356
																														57.487	40.8522		43.178	46.014		84.4375	38.2639
																														44.8677	52.9402		19.2994	35.2164		47.9922	39.6207
																														23.8172	38.4098		32.1349	58.1314		29.3583	102.09
																														56.252	30.5788		31.9508	65.5589		33.8039	118.328
																														224.787	85.3474		36.8002	116.017		82.7343	141.509
																														73.4111	62.2822		39.9922	61.1147		75.8205	144.208
																														98.3875	96.5246		48.9912	58.3585		38.7691	87.1222
																														74.791	30.2821		36.2416	44.1295		103.216	157.039
																														31.2756	20.5744		63.5332	36.2416		77.2495	99.362
																														60.2054	96.1796		36.8493	54.657		85.6932	97.5
																														68.9885	81.7596		105.336	58.2418		91.9286	124.087
																															50.0769		79.4933	48.8254		78.7794	56.0318
																															53.8164		24.0874	137.625		70.0759	213.475
																														41.9699	41.0661		46.2227	111.229		65.8324	214.053
																														26.9979	43.5361		22.3932	73.9072		36.7339	89.6769
																														63.945	122.329		22.3932	92.7524		97.399	258.076
																														35.9121	95.4207		23.1421	93.9801		77.4948	114.676
																														41.3628	128.815		26.4139	99.873		104.457	160.792
																														44.9505	42.032		25.1739	73.4775		68.4016
																														55.0652	75.274		40.3421	78.5111		72.2554
																														40.7349	204.502		41.6311	298.453		115.369
																														71.4103	260.182		105.52	181.944		103.144
																														41.418	170.419		105.52	231.482		215.352
																														118.396	99.9054		64.8837	151.62		84.6829
																														89.3491	51.8432		75.3191	88.8851		70.379
																														27.0738	83.6915		66.3569	46.1245		34.4245
																														51.9536	96.7316		70.838	74.4597		41.1795
																														25.1695	55.8794		105.95	86.0614		35.2905
																														25.1695	45.675		77.8972	49.7155		40.5156
																														26.0113	72.3762		54.301	40.6367		49.8542
																														29.6887	102.389		49.2919	64.3926		38.6392
																														28.295	85.4163		80.721	91.095	n =	158	159
																														45.3438	121.915		60.065	75.9943
																														46.7927	79.2067		93.4276	108.467		D'Agostino & Pearson test
																														118.603	81.4836		122.278	70.4697		p-value
																														118.603	158.897		145.912	72.4954		< 0.0001	< 0.0001
																														72.9282	77.3439		145.912	141.369
																														84.6574	94.7997		67.646	68.8123		One sample t-test
																														74.5841	557.207		47.4872	84.3427		p = 0.5716
																														79.6207	637.38		112.15	495.743
																														119.086	51.1739		70.5311	567.072
																														87.5552	32.3865		59.7888	45.5291
																														61.0334	53.6991		94.2256	28.814
																														55.4033	77.1369		35.9592	47.7758
																														90.729	148.685		72.6182	68.6282
																														67.512	65.9182		19.0538	132.284
																														105.011	63.5241		94.0414	58.647
																														137.439	28.5434		30.3732	56.5169
																														164.002	61.5508		22.2397	25.3949
																														164.002	92.2469		47.831	54.7613
																														76.033	96.9386		56.474	82.0714
																														53.3749	38.396		36.2661	86.2456
																														126.055	39.7552		29.9987	34.1606
																														79.2758	27.2049		22.0801	35.3699
																														67.2015	91.6259			24.204
																														105.908	21.361			81.519
																														40.4175	41.6111	n =	190	194
																														81.6216	18.4839
																														21.4162	51.6983		D'Agostino & Pearson test
																														105.701	31.6965		p-value
																														34.1389	33.6698		< 0.0001	< 0.0001
																														24.997	39.3205
																														53.7612	55.6724		One sample t-test
																														63.4758	36.4365		p = 0.7666
																														40.7625
																														33.7181
																														24.8177
																													n =	206	191
																														D'Agostino & Pearson test
																														p-value
																														< 0.0001	< 0.0001
																														One sample t-test
																														p = 0.0966
[truncated: 10 more columns]
