# Supplementary material for: Rho GTPase signaling and mDia facilitate endocytosis via presynaptic actin
Source: eLife journal article supplement (doi:10.7554/elife.92755), 2023-12-05
Supplement: fig5-data1 [file elife-92755-fig5-data1-v1.zip]

## Sheet: Figure 5
		Figure 5C																	Figure 5D						Figure 5F
		relative intensity																	τ [s; Syph-pH; 40Hz5s]						RhoA-GTP/total RhoA
	distance [nm]	Bassoon					RhoA					Homer1							RhoA-WT + RhoB-WT	RhoA-WT + RhoB-DN	RhoA-DN + RhoB-WT	RhoA-DN + RhoB-DN			shCTR	shmDia1+3
	416.262	0.193931	0.147373	0.169272	0.114563	0.140982	0.282687	0.627996	0.374593	0.139751	0.370839	0.071481	0.135021	0.104497	0.030379	0.069623			17.19	18.01	17.03	30.61			1	0.746572
	397.341	0.187145	0.152552	0.16931	0.114353	0.139455	0.28043	0.678273	0.384265	0.139824	0.351762	0.07066	0.129378	0.087129	0.037953	0.072306			18.45	14.8	24.54	31.45			1	0.739028
	378.42	0.18632	0.155488	0.163955	0.129909	0.14369	0.290029	0.69067	0.385992	0.162258	0.352835	0.069731	0.133423	0.091986	0.037307	0.068667			19.51	15.15	17.82	28.11			1	0.731349
	359.499	0.184736	0.179405	0.159308	0.123322	0.147273	0.294566	0.657735	0.392878	0.149544	0.341917	0.071083	0.120365	0.094297	0.038227	0.064382
	340.578	0.1842	0.163966	0.163052	0.122508	0.148171	0.301856	0.637393	0.388551	0.151458	0.362013	0.073138	0.119079	0.083739	0.03359	0.063663			one-way ANOVA with Tukey's post-test						One sample t-test
	321.657	0.183817	0.162037	0.166097	0.123506	0.151746	0.307642	0.640794	0.405123	0.164204	0.366772	0.076536	0.115275	0.084686	0.043058	0.063967			p-value						p = 0.0003
	302.736	0.183966	0.181216	0.172373	0.126413	0.159971	0.317779	0.633612	0.400746	0.153449	0.379377	0.081243	0.113528	0.081739	0.052731	0.072411			0.6514	RhoA-WT + RhoB-WT vs. RhoA-WT + RhoB-DN
	283.815	0.189512	0.179581	0.167866	0.116266	0.170744	0.318658	0.631762	0.400279	0.156417	0.392802	0.083692	0.112793	0.083685	0.054855	0.080585			0.8945	RhoA-WT + RhoB-WT vs. RhoA-DN + RhoB-WT
	264.894	0.202242	0.194922	0.17818	0.11618	0.179413	0.335546	0.674841	0.40998	0.161939	0.419897	0.08526	0.110118	0.083213	0.059298	0.077266			0.0019	RhoA-WT + RhoB-WT vs. RhoA-DN + RhoB-DN
	245.973	0.221348	0.197043	0.195972	0.124229	0.199464	0.365254	0.673322	0.412088	0.164294	0.410757	0.087458	0.103386	0.091042	0.061223	0.086546			0.3055	RhoA-WT + RhoB-DN vs. RhoA-DN + RhoB-WT
	227.052	0.24657	0.203777	0.203989	0.134302	0.222966	0.383544	0.66682	0.419727	0.183737	0.42682	0.095658	0.109964	0.09158	0.063256	0.090777			0.0005	RhoA-WT + RhoB-DN vs. RhoA-DN + RhoB-DN
	208.131	0.270356	0.223347	0.219345	0.151344	0.252595	0.424739	0.676521	0.44376	0.194938	0.461888	0.100564	0.118498	0.101031	0.072999	0.102703			0.0042	RhoA-DN + RhoB-WT vs. RhoA-DN + RhoB-DN
	189.21	0.301502	0.248421	0.2372	0.161153	0.28856	0.46379	0.693893	0.465975	0.206856	0.477365	0.116665	0.123517	0.099512	0.085625	0.115806
	170.289	0.337122	0.274306	0.257632	0.185116	0.32144	0.518247	0.706563	0.510178	0.23512	0.507846	0.129715	0.130939	0.110998	0.096009	0.128777
	151.368	0.382853	0.314216	0.299178	0.226832	0.372977	0.54693	0.72596	0.573022	0.296273	0.553694	0.159447	0.143872	0.134	0.109312	0.139296
	132.447	0.436032	0.392633	0.355243	0.285217	0.440476	0.590572	0.775989	0.626184	0.362012	0.628247	0.186237	0.169512	0.143642	0.136051	0.155171
	113.526	0.508854	0.459789	0.434293	0.353591	0.515453	0.658926	0.792501	0.683686	0.447464	0.677452	0.213733	0.198628	0.177166	0.164887	0.181703
	94.605	0.607878	0.550879	0.536632	0.460008	0.615468	0.726048	0.849251	0.765264	0.56585	0.759852	0.265643	0.234812	0.232807	0.202744	0.216683
	75.684	0.719719	0.689793	0.645999	0.610532	0.711955	0.821324	0.903282	0.84331	0.694358	0.865999	0.324642	0.272055	0.292111	0.257884	0.264648
	56.763	0.817677	0.79111	0.75155	0.75151	0.822238	0.909978	0.953921	0.904019	0.845477	0.914706	0.388478	0.344643	0.359316	0.349355	0.32136
	37.842	0.914359	0.888079	0.882259	0.908007	0.911654	0.964239	0.987549	0.992931	0.945024	0.977278	0.480408	0.423794	0.424154	0.419071	0.379143
	18.921	1	1	1	1	1	1	1	1	1	1	0.595502	0.522809	0.527623	0.521325	0.456007
	0	0.917855	0.896125	0.90522	0.926324	0.915	0.966633	0.943804	0.978368	0.978381	0.974476	0.681711	0.629206	0.640866	0.61677	0.537351
	-18.921	0.826079	0.779803	0.799715	0.79412	0.826158	0.906507	0.894909	0.915345	0.915269	0.928966	0.778612	0.735225	0.724724	0.710136	0.636172
	-37.842	0.70003	0.65224	0.671213	0.664772	0.72014	0.821209	0.833155	0.854806	0.796682	0.867446	0.880994	0.844114	0.850665	0.812751	0.720483
	-56.763	0.584757	0.50906	0.553558	0.510516	0.594363	0.737185	0.705581	0.778888	0.66475	0.769912	0.930657	0.946838	0.902313	0.912934	0.807434
	-75.684	0.499508	0.405104	0.450273	0.376533	0.494277	0.664568	0.643428	0.656157	0.555436	0.667656	0.994476	1	0.966443	0.945644	0.876898
	-94.605	0.425417	0.302635	0.363465	0.310351	0.400163	0.611641	0.572527	0.572994	0.466591	0.612884	1	0.967902	1	0.978467	0.957306
	-113.526	0.360823	0.240237	0.309748	0.254147	0.320664	0.565358	0.543474	0.512937	0.397314	0.535962	0.965049	0.982981	0.995643	1	0.980717
	-132.447	0.305875	0.20067	0.250005	0.210588	0.260245	0.511393	0.535532	0.460219	0.346372	0.493401	0.932199	0.927191	0.961516	0.981025	0.988698
	-151.368	0.268341	0.17672	0.223788	0.175133	0.220668	0.479353	0.494644	0.406339	0.300078	0.451843	0.855735	0.82582	0.921348	0.910984	1
	-170.289	0.251397	0.158367	0.210658	0.151688	0.187004	0.453327	0.489541	0.375248	0.254715	0.419554	0.792258	0.754755	0.830579	0.839269	0.961759
	-189.21	0.236562	0.14947	0.186971	0.121548	0.172057	0.432756	0.454322	0.345721	0.226696	0.433061	0.70989	0.650144	0.772747	0.758624	0.926643
	-208.131	0.220702	0.139336	0.164915	0.106398	0.154292	0.417082	0.448626	0.321415	0.175422	0.412775	0.63593	0.5272	0.66689	0.665345	0.869795
	-227.052	0.214153	0.130993	0.159348	0.097577	0.144237	0.406558	0.452146	0.313309	0.144468	0.405061	0.551249	0.445902	0.553654	0.550606	0.803935
	-245.973	0.206245	0.121329	0.14437	0.081216	0.13915	0.396827	0.454946	0.293576	0.132616	0.403065	0.468133	0.373041	0.471125	0.480489	0.735144
	-264.894	0.193117	0.119708	0.140686	0.084282	0.124187	0.384033	0.474151	0.29089	0.118523	0.390603	0.418853	0.299412	0.396893	0.416346	0.653781
	-283.815	0.192338	0.115397	0.124253	0.089213	0.121887	0.375982	0.452474	0.292739	0.116928	0.407601	0.366731	0.242611	0.326194	0.347353	0.579258
	-302.736	0.187919	0.120256	0.13172	0.093193	0.115543	0.369034	0.476955	0.285752	0.112926	0.397336	0.323939	0.190038	0.262838	0.299308	0.511962
	-321.657	0.187868	0.117251	0.121548	0.085979	0.108118	0.368981	0.474386	0.291472	0.113124	0.404391	0.291064	0.173851	0.21353	0.251103	0.444096
	-340.578	0.189334	0.114193	0.12504	0.087287	0.109465	0.365388	0.4653	0.278876	0.107798	0.393035	0.252465	0.143957	0.190819	0.207186	0.394582
	-359.499	0.193362	0.108605	0.132647	0.099601	0.11356	0.366056	0.47741	0.292026	0.115047	0.393204	0.225869	0.127026	0.163879	0.171155	0.34264
	-378.42	0.187695	0.111745	0.128179	0.10509	0.114111	0.365941	0.468658	0.28696	0.116233	0.367744	0.200836	0.115974	0.140671	0.144695	0.299923
	n =	49	43	44	38	56	49	43	44	38	56	49	43	44	38	56
		230					230					230
