# Supplementary material for: Rho GTPase signaling and mDia facilitate endocytosis via presynaptic actin
Source: eLife journal article supplement (doi:10.7554/elife.92755), 2023-12-05
Supplement: fig5-figsupp1-data1 [file elife-92755-fig5-figsupp1-data1-v1.zip]

## Sheet: Figure 5 S1
	Figure 5 S1A														Figure 5 S1B			Figure 5 S1C								Figure 5 S1D
		norm. ΔF [Syph-pH; 40Hz5s]													Fmax/F0 [Syph-pH; 40Hz5s]				norm. ΔF [Syph-pH; 40Hz5s]							Fmax/F0 [Syph-pH; 40Hz5s]
	time [s]	RhoA-WT + RhoB-WT			RhoA-WT + RhoB-DN			RhoA-DN + RhoB-WT			RhoA-DN + RhoB-DN				shCTR	shRhoA+B		time [s]	shCTR			shRhoA+B				RhoA-WT + RhoB-WT	RhoA-WT + RhoB-DN	RhoA-DN + RhoB-WT	RhoA-DN + RhoB-DN
	0	-0.00046	-0.00389	-0.01325	0.002077	-0.0104	-0.01061	-0.00225	-0.01056	-0.01429	-0.01398	-0.02051	-0.01574		1.39933	1.39763		0	-0.00503	-0.00233	-0.0125461	-0.00115709	-0.00605719	-0.0131238		2.16043	1.64968	1.87263	1.70962
	2	0.002147	0.000844	-0.0086	0.011984	0.000749	-0.00108	-0.00048	0.009448	-3.2e-06	-3.2e-05	0.001636	0.001087		1.95359	1.66759		2	0.002666	0.001034	0.000444866	0.00376999	-0.00110494	0.00197701		1.79306	1.89799	1.60149	1.56861
	4	-0.00251	0.004577	0.005508	0.001581	0.00352	-0.00498	0.001306	0.007902	0.005411	0.000888	0.006355	0.000314		1.5724	1.66603		4	0.003621	0.00071	0.00115642	8.14229e-05	9.92796e-05	0.00545941		1.60245	2.02947	1.90341	1.95925
	6	0.0001	0.001929	0.010898	-0.00779	0.001037	-0.00442	0.001575	0.004045	0.001237	0.003146	0.007974	0.005782					6	0.001599	0.000728	0.00154678	-0.00147246	0.0035708	0.00236152
	8	0.000715	-0.00346	0.005441	-0.00785	0.005091	0.021091	-0.00015	-0.01084	0.007641	0.009974	0.004547	0.008555		two-tailed t-test			8	-0.00286	-0.00014	0.00939801	-0.00122187	0.00349204	0.00332586		one-way ANOVA with Tukey's post-test
	10	0.469504	0.328824	0.363347	0.32207	0.326721	0.402146	0.263522	0.273053	0.349509	0.28398	0.306629	0.323731		p = 0.7464			10	0.257857	0.393834	0.28997	0.286222	0.32139	0.351677		p-value
	12	0.837047	0.749366	0.759192	0.723859	0.757573	0.803049	0.696777	0.684212	0.745894	0.699331	0.711056	0.740271					12	0.678781	0.796866	0.716373	0.697483	0.703443	0.765469		> 0.9999	RhoA-WT + RhoB-WT vs. RhoA-WT + RhoB-DN
	14	1	1	1	1	1	1	1	1	1	1	1	1					14	1	1	1	1	1	1		0.9856	RhoA-WT + RhoB-WT vs. RhoA-DN + RhoB-WT
	16	0.904496	0.892272	0.923404	0.900007	0.859539	0.876833	0.903575	0.978657	0.936081	0.933362	0.940997	0.925151					16	0.916458	0.934118	0.918536	0.926267	0.972375	0.894367		0.9275	RhoA-WT + RhoB-WT vs. RhoA-DN + RhoB-DN
	18	0.786098	0.799291	0.810294	0.795979	0.722248	0.748308	0.791461	0.898855	0.853934	0.839724	0.858811	0.835722					18	0.806539	0.85147	0.765204	0.841184	0.924759	0.791346		0.9801	RhoA-WT + RhoB-DN vs. RhoA-DN + RhoB-WT
	20	0.687046	0.704788	0.706905	0.70156	0.599927	0.640118	0.685649	0.840347	0.758153	0.744966	0.784592	0.75593					20	0.704957	0.761423	0.629653	0.754208	0.871332	0.703143		0.9141	RhoA-WT + RhoB-DN vs. RhoA-DN + RhoB-DN
	22	0.593807	0.639494	0.627167	0.611202	0.513018	0.554786	0.601582	0.752329	0.674984	0.663665	0.71432	0.688181					22	0.626781	0.675701	0.50907	0.68184	0.826484	0.624118		0.9929	RhoA-DN + RhoB-WT vs. RhoA-DN + RhoB-DN
	24	0.517552	0.576805	0.55645	0.54026	0.440781	0.479286	0.52385	0.699275	0.599016	0.597319	0.662056	0.629441					24	0.546344	0.597274	0.42846	0.61063	0.775296	0.562107
	26	0.455722	0.523836	0.486351	0.486142	0.380571	0.418959	0.466373	0.637678	0.536491	0.542131	0.603814	0.580166					26	0.483567	0.529288	0.357748	0.551316	0.72903	0.508556
	28	0.400055	0.472582	0.444398	0.437047	0.339654	0.363581	0.409651	0.608689	0.476439	0.500884	0.57087	0.534401					28	0.424436	0.473342	0.319189	0.502609	0.688962	0.462439
	30	0.35782	0.426387	0.396902	0.391991	0.305517	0.317242	0.367071	0.542431	0.419394	0.469244	0.529865	0.49332					30	0.379234	0.426217	0.266426	0.464337	0.64335	0.421335
	32	0.323221	0.38911	0.356366	0.354081	0.270975	0.283492	0.326588	0.486292	0.378187	0.437212	0.495195	0.46182					32	0.335695	0.385764	0.227185	0.430067	0.612398	0.384393
	34	0.29104	0.351989	0.334306	0.314142	0.245945	0.254602	0.299637	0.434227	0.338681	0.411819	0.467808	0.435491					34	0.300281	0.346936	0.216439	0.402208	0.572313	0.353208
	36	0.260444	0.320341	0.313282	0.289811	0.221118	0.230874	0.262967	0.395358	0.298869	0.390262	0.450037	0.405794					36	0.268394	0.315365	0.191106	0.375538	0.545845	0.32328
	38	0.237913	0.288542	0.281767	0.265628	0.204975	0.208412	0.245055	0.381054	0.27388	0.374362	0.421105	0.382331					38	0.239423	0.288641	0.168023	0.352071	0.514304	0.30535
	40	0.212955	0.257874	0.263575	0.239029	0.189584	0.194278	0.21407	0.342043	0.24411	0.356818	0.405656	0.355189					40	0.215263	0.26523	0.151674	0.326838	0.491169	0.275758
	42	0.201759	0.238971	0.235998	0.224837	0.176788	0.175015	0.195179	0.321603	0.217885	0.34654	0.380716	0.340041					42	0.1913	0.243131	0.13838	0.312211	0.471143	0.260606
	44	0.180214	0.213312	0.222608	0.206766	0.164411	0.158583	0.175977	0.301292	0.201452	0.333076	0.364132	0.327995					44	0.171995	0.223688	0.127494	0.297993	0.443393	0.244903
	46	0.166178	0.1977	0.208093	0.187402	0.154399	0.148754	0.160896	0.247461	0.173715	0.319875	0.337044	0.304801					46	0.154524	0.210988	0.104304	0.282405	0.423063	0.226478
	48	0.154767	0.169179	0.189057	0.168812	0.139767	0.137257	0.14531	0.22593	0.149595	0.309966	0.326693	0.288124					48	0.128938	0.193954	0.0879238	0.274462	0.407237	0.211678
	50	0.139093	0.157612	0.17393	0.156255	0.132503	0.124746	0.138089	0.214618	0.13346	0.301655	0.312606	0.274046					50	0.117276	0.1812	0.0910775	0.260431	0.379172	0.193604
	52	0.132058	0.147387	0.167968	0.140219	0.130447	0.112885	0.12308	0.210474	0.117643	0.293492	0.295992	0.262854					52	0.101007	0.165514	0.0684817	0.251882	0.368632	0.180578
	54	0.122055	0.125158	0.157635	0.126864	0.115727	0.107224	0.113339	0.182683	0.102703	0.287577	0.287005	0.251733					54	0.088389	0.160227	0.0657619	0.243395	0.350273	0.170309
	56	0.113772	0.113425	0.143278	0.115454	0.117224	0.098791	0.103754	0.179234	0.079446	0.272807	0.281068	0.239181					56	0.084744	0.14724	0.0718728	0.236218	0.335702	0.153138
	58	0.109412	0.106005	0.143492	0.107769	0.103334	0.092867	0.095042	0.161482	0.07385	0.270582	0.268168	0.235326					58	0.071471	0.13796	0.0619712	0.230838	0.323908	0.13758
	60	0.10396	0.091519	0.135781	0.10029	0.099658	0.076513	0.09183	0.145297	0.056145	0.261959	0.256184	0.227861					60	0.060982	0.129478	0.0457136	0.224261	0.309691	0.127451
	62	0.097172	0.078817	0.118784	0.088823	0.091239	0.073887	0.085014	0.131591	0.049838	0.254669	0.245384	0.217317					62	0.049612	0.119353	0.036952	0.213424	0.299172	0.11865
	64	0.093533	0.065022	0.114102	0.081626	0.082218	0.065042	0.07744	0.124525	0.03901	0.247867	0.236787	0.207804					64	0.053138	0.117116	0.0381284	0.210929	0.290342	0.107897
	66	0.087699	0.058221	0.112307	0.071763	0.084521	0.058114	0.07207	0.113402	0.024037	0.246691	0.224793	0.194864					66	0.045511	0.110417	0.0268667	0.20617	0.279258	0.100402
	68	0.084287	0.043512	0.101772	0.059242	0.07892	0.053125	0.06795	0.105736	0.012894	0.234029	0.219054	0.189628					68	0.038445	0.10405	0.0246824	0.20158	0.271012	0.0833885
	70	0.081392	0.038606	0.092328	0.055554	0.070309	0.041645	0.060331	0.095587	0.006365	0.227811	0.21462	0.179511					70	0.03465	0.096753	0.0259841	0.199659	0.257796	0.0815197
	72	0.071782	0.026634	0.082749	0.0489	0.064506	0.039546	0.057699	0.085174	0.001278	0.222109	0.199846	0.171293					72	0.028425	0.092125	0.0203122	0.192094	0.251864	0.076097
	74	0.069855	0.011388	0.08613	0.045315	0.063245	0.03641	0.047549	0.083055	-0.00509	0.21477	0.200142	0.161345					74	0.020408	0.087504	0.018426	0.186354	0.239227	0.0691582
	76	0.063986	-0.00074	0.06761	0.035941	0.052665	0.031038	0.049567	0.068609	-0.01496	0.21276	0.184022	0.154933					76	0.023612	0.080072	0.0108003	0.187656	0.234077	0.0537995
	78	0.057947	-0.00142	0.056681	0.033455	0.045077	0.028777	0.043593	0.067708	-0.0247	0.207769	0.17744	0.155774					78	0.008714	0.074181	0.0109876	0.182857	0.226613	0.0498203
	80	0.051784	-0.01591	0.056147	0.034519	0.038384	0.02215	0.040477	0.051554	-0.03496	0.200803	0.173984	0.147423					80	0.011148	0.069107	0.0116631	0.180864	0.21973	0.0409748
	82	0.0467	-0.02062	0.028247	0.022408	0.039465	0.014121	0.036589	0.045419	-0.0389	0.191183	0.154933	0.145766					82	0.011405	0.063409	-0.0011744	0.177164	0.21676	0.0355727
	84	0.043155	-0.03295	0.039535	0.015669	0.033486	0.013773	0.032829	0.042378	-0.04754	0.191026	0.152369	0.137237					84	0.004132	0.060676	-0.00844156	0.172853	0.199126	0.0220899
	86	0.038206	-0.04042	0.032881	0.011495	0.032277	0.010567	0.031254	0.050748	-0.04984	0.184948	0.151785	0.131255					86	0.004579	0.058701	-0.0133789	0.171497	0.194879	0.0187806
	88	0.030821	-0.05212	0.026934	0.006737	0.028032	0.006056	0.024888	0.04142	-0.05103	0.178031	0.14342	0.128038					88	0.002862	0.05279	-0.014688	0.170787	0.189207	0.00629433
	90	0.026889	-0.05383	0.02052	-0.00074	0.021496	-0.00159	0.021665	0.035529	-0.06449	0.169439	0.127617	0.121614					90	-0.00336	0.050595	-0.0119509	0.162469	0.177239	0.00162584
	92	0.025326	-0.05774	0.017047	-0.00652	0.019535	-0.00224	0.017749	0.023593	-0.06754	0.165523	0.112812	0.10922					92	-0.006	0.044673	-0.0305482	0.157751	0.16827	-0.00496455
	94	0.024028	-0.06642	0.00898	-0.01053	0.018461	-0.0115	0.019018	0.035634	-0.07635	0.16213	0.110772	0.108012					94	-0.00316	0.040001	-0.0164556	0.155926	0.1695	-0.0185999
	96	0.019952	-0.07313	0.006164	-0.01182	0.012646	-0.01401	0.009642	0.027514	-0.08143	0.163729	0.101026	0.099592					96	-0.0102	0.03746	-0.0230495	0.162277	0.159976	-0.0276307
	98	0.015282	-0.08006	-0.00016	-0.00903	0.009072	-0.0165	0.009429	-0.00199	-0.08623	0.158699	0.102194	0.094049					98	-0.01701	0.032547	-0.0309354	0.161561	0.148206	-0.0342862
	n =	7	9	5	10	9	12	10	3	10	9	5	8					n =	5	16	6	6	11	8
		21			31			23			22								27			25
