# Supplementary material for: Rho GTPase signaling and mDia facilitate endocytosis via presynaptic actin
Source: eLife journal article supplement (doi:10.7554/elife.92755), 2023-12-05
Supplement: fig6-data4 [file elife-92755-fig6-data4-v1.zip]

## Sheet: Figure 6
	Figure 6B			Figure 6E											Figure 6F																										Figure 6G					Figure 6H
					relative intensity											norm. ΔF [vGAT-CypHer; 40Hz5s]																									τ [s; vGAT-CypHer; 40Hz5s]					τ [s; Syph-pH; 40Hz5s]
	Rac1-GTP/total Rac1			distance [nm]	Bassoon			Rac1			Homer1				time [s]	shCTR + DMSO								shmDia1+3 + DMSO								shmDia1+3 + EHT 1864									shCTR + DMSO	shmDia1+3 + DMSO	shCTR + EHT 1864	shmDia1+3 + EHT 1864		shCTR	shmDia1+3	shCTR + Rac1-CA	shmDia1+3 + Rac1-CA
	shCTR	shmDia1+3		416.262	0.139237	0.114574	0.13729	0.599765	0.557127	0.791931	0.099542	0.204647	0.284845		0	0.01491	-0.00959	0.020142	-0.0306	0.009014	-0.04097	-0.00551	-0.01781	-0.03042	0.026398	-0.07841	0.029175	0.011449	0.037023	-0.01312	0.01675	0.006885	0.118015	0.032973	0.036802	-0.02777	-0.01286	0.03668	-0.00951		15.04	23.08	30.79	48.28				18.16	14.94
	1	2.34361		397.341	0.187067	0.125504	0.137603	0.820527	0.611389	0.820986	0.139714	0.219951	0.287653		2	-0.01239	0.032667	-0.01501	-0.05661	0.017588	-0.01301	-0.03888	0.033537	0.012887	0.055524	-0.01743	0.03789	-0.02618	0.038928	0.012132	0.032694	0.040578	0.018533	0.061433	-0.03206	0.010857	0.00391	-0.01122	-0.05732		16.75	27.14	29.04	36.55		11.02	24.2	11.27	14.42
	1	2.47312		378.42	0.190869	0.125416	0.145352	0.801159	0.603946	0.85029	0.142412	0.217914	0.310807		4	0.026303	-0.03643	0.005728	0.016267	0.032495	0.008157	-0.00923	0.043992	0.014832	-0.04461	-0.04918	0.03054	0.04715	0.026797	0.000335	-0.0005	-0.02966	-0.01152	-0.01796	0.06462	-0.03547	0.017282	0.041045	-0.02935		16.81	24.29	16.51	26.2		11.67	20.38
	1	1.8014		359.499	0.17752	0.121855	0.154045	0.778111	0.654696	0.900207	0.142104	0.211817	0.315696		6	0.034548	0.005006	-0.02141	0.021038	-0.03057	-0.01427	0.018044	-0.04377	-0.01002	0.048036	0.017035	0.034696	-0.03806	0.017314	-0.00778	0.007232	-0.0549	-0.0267	-0.0129	-0.03153	0.001491	-0.01979	-0.00357	-0.01293		18.26	30.42	75.75	56.04		13.28		11.31	10.41
				340.578	0.179237	0.120888	0.155409	0.791455	0.734135	0.958602	0.147795	0.209468	0.307017		8	-0.02178	0.012043	-0.02922	0.020257	-0.00182	0.015504	-0.04003	-0.01906	-0.00079	-0.0267	0.08082	-0.08013	-0.01631	-0.02424	-0.03691	-0.00918	0.014172	0.000259	-0.02723	-0.04657	-0.00213	-0.03856	-0.03302	0.024929		15.57	41.96	23.81	34.87			23.45
	One sample t-test			321.657	0.178849	0.140259	0.165503	0.821861	0.743292	0.958036	0.15911	0.216108	0.320128		10	-0.05221	0.010899	0.043038	0.064353	-0.02987	-0.03926	0.039939	0.010985	-0.016	-0.04828	0.084757	0.003987	-0.05841	-0.02062	-0.04227	-0.10478	-0.0028	-0.06299	-0.09457	-0.01614	-0.02896	-0.02592	-0.04895	0.016417		10.84	21.18	22.79	57.47
	p = 0.0279			302.736	0.202463	0.145673	0.17237	0.803643	0.791152	0.928902	0.155815	0.219533	0.321942		12	0.009553	-0.04389	0.000211	0.01729	-0.02143	0.076318	0.034648	-0.01386	0.014447	-0.06848	-0.01554	-0.05957	-0.04419	-0.06488	-0.00673	-0.09122	-0.09881	-0.1166	-0.03381	-0.07113	-0.08229	-0.00336	-0.02104	-0.0376		11.92	23.1	22.27	26.74		one-way ANOVA with Tukey's post-test
				283.815	0.207414	0.153874	0.182808	0.862336	0.807278	0.903657	0.16102	0.232769	0.324222		14	0.01107	-0.01242	-0.00779	0.024789	-0.01008	0.052308	-0.0259	-0.0153	-0.05209	0.00345	-0.02983	-0.04524	-0.0932	-0.06103	-0.04184	-0.01762	-0.03433	-0.10914	0.046578	-0.06454	-0.03662	0.007352	-0.08535	-0.0543		12.38	28.71	21.38	41.49		p-value
				264.894	0.221992	0.167842	0.198195	0.884026	0.864433	0.823159	0.177758	0.242065	0.321177		16	0.002264	-0.12022	-0.0308	0.012721	-0.01746	-0.01422	-0.02154	-0.0425	-0.06443	-0.15981	0.095095	-0.10362	-0.11879	-0.07539	-0.0773	-0.10381	-0.1444	-0.17213	-0.04462	-0.04191	-0.05804	-0.02966	-0.07015	-0.03562							0.0029	shCTR vs. shmDia1+3
				245.973	0.238709	0.171765	0.219215	0.890364	0.92271	0.765703	0.173466	0.248001	0.318703		18	-0.31648	-0.65178	-0.23141	-0.25478	-0.37203	-0.53046	-0.3996	-0.31388	-0.36247	-0.55818	-0.16538	-0.34272	-0.53947	-0.42797	-0.36226	-0.3413	-0.27124	-0.58581	-0.40142	-0.40228	-0.37152	-0.44643	-0.36334	-0.26357		D'Agostino & Pearson test					0.9702	shCTR vs. shCTR + Rac1-CA
				227.052	0.260328	0.192014	0.23833	0.923165	0.898532	0.771709	0.183273	0.259329	0.317414		20	-0.72247	-0.96572	-0.66652	-0.6905	-0.77552	-0.81297	-0.7791	-0.70681	-0.73789	-0.95811	-0.66435	-0.68563	-0.85111	-0.77963	-0.79188	-0.73785	-0.74724	-0.83582	-0.70827	-0.72089	-0.77573	-0.78128	-0.80541	-0.61279		p-value					0.9889	shCTR vs. shmDia1+3 + Rac1-CA
				208.131	0.294051	0.209918	0.275615	0.924469	0.880444	0.736853	0.193158	0.272446	0.310733		22	-0.96719	-0.95287	-0.98635	-0.972	-0.99796	-1	-1	-0.98049	-0.9889	-0.96211	-0.95046	-0.95694	-0.99818	-1	-0.97741	-0.98503	-0.85228	-0.89545	-1	-0.91582	-0.97347	-0.9588	-1	-0.90642		0.4882	0.0145	< 0.0001	0.547		< 0.0001	shCTR vs. shCTR + Rac1-DN
				189.21	0.323046	0.230843	0.295672	0.891681	0.83396	0.775869	0.195442	0.283567	0.321013		24	-0.93678	-0.81414	-0.95805	-0.94119	-0.96674	-0.87342	-0.86722	-0.93484	-0.9319	-0.88479	-0.89988	-0.9054	-0.90976	-0.90476	-0.93659	-0.95114	-0.95597	-0.90555	-0.92642	-0.96031	-0.95851	-0.92573	-0.9062	-0.97386							< 0.0001	shCTR vs. shmDia1+3 + Rac1-DN
				170.289	0.352119	0.268921	0.332546	0.892127	0.793351	0.793624	0.207056	0.300134	0.327275		26	-0.9046	-0.7245	-0.84272	-0.90066	-0.83759	-0.75872	-0.77153	-0.85985	-0.90312	-0.77654	-0.87513	-0.86724	-0.8601	-0.82426	-0.81998	-0.87581	-0.94111	-0.80489	-0.84956	-0.97002	-0.87678	-0.87026	-0.89364	-0.93022		Kruskal-Wallis with Dunn's post test					0.0099	shmDia1+3 vs. shCTR + Rac1-CA
				151.368	0.387727	0.293048	0.387722	0.941061	0.773467	0.803544	0.228088	0.312065	0.330077		28	-0.78246	-0.60165	-0.74131	-0.73572	-0.72627	-0.58046	-0.698	-0.73213	-0.84342	-0.74034	-0.78346	-0.75366	-0.78268	-0.74733	-0.71919	-0.80146	-0.76572	-0.78112	-0.79938	-0.87271	-0.81824	-0.8047	-0.77008	-0.83657		p-value					0.0077	shmDia1+3 vs. shmDia1+3 + Rac1-CA
				132.447	0.44387	0.346992	0.454684	0.936136	0.842075	0.829318	0.227355	0.338137	0.340666		30	-0.69958	-0.49833	-0.65325	-0.66351	-0.61868	-0.44906	-0.57921	-0.58048	-0.74036	-0.64597	-0.71402	-0.69317	-0.66174	-0.59871	-0.62241	-0.67699	-0.74531	-0.70444	-0.71833	-0.86088	-0.72667	-0.82864	-0.68263	-0.77019		0.022	shCTR + DMSO vs. shmDia1+3 + DMSO				0.2131	shmDia1+3 vs. shCTR + Rac1-DN
				113.526	0.507242	0.414367	0.520298	0.947379	0.865079	0.832963	0.254235	0.35665	0.36678		32	-0.60186	-0.42362	-0.56782	-0.53899	-0.51348	-0.32926	-0.46804	-0.47293	-0.72487	-0.53277	-0.72495	-0.62496	-0.57401	-0.54852	-0.58322	-0.62633	-0.59868	-0.60318	-0.69653	-0.82997	-0.64171	-0.7581	-0.6519	-0.67317		0.0584	shCTR + DMSO vs. shCTR + EHT 1864				0.0028	shmDia1+3 vs. shmDia1+3 + Rac1-DN
				94.605	0.573329	0.494288	0.603284	0.956329	0.859227	0.844726	0.280914	0.394534	0.398591		34	-0.57484	-0.36832	-0.44815	-0.4871	-0.42921	-0.30562	-0.3509	-0.41478	-0.55534	-0.48316	-0.58005	-0.52214	-0.52126	-0.45782	-0.45716	-0.60793	-0.54503	-0.62183	-0.673	-0.73706	-0.61619	-0.66794	-0.53856	-0.64826		< 0.0001	shCTR + DMSO vs. shmDia1+3 + EHT 1864				> 0.9999	shCTR + Rac1-CA vs. shmDia1+3 + Rac1-CA
				75.684	0.647501	0.588646	0.692842	0.943726	0.871379	0.854453	0.304102	0.432809	0.427319		36	-0.4713	-0.27172	-0.44852	-0.43127	-0.36559	-0.30007	-0.27204	-0.35815	-0.57533	-0.46048	-0.57789	-0.46074	-0.54466	-0.41058	-0.37301	-0.48327	-0.48991	-0.5465	-0.57416	-0.71655	-0.55265	-0.64079	-0.4815	-0.58994		> 0.9999	shmDia1+3 + DMSO vs. shCTR + EHT 1864				0.0002	shCTR + Rac1-CA vs. shCTR + Rac1-DN
				56.763	0.736979	0.667246	0.789964	0.9577	0.831583	0.880765	0.348522	0.490331	0.460052		38	-0.33606	-0.25664	-0.3197	-0.35491	-0.32032	-0.17783	-0.21893	-0.29413	-0.42871	-0.4296	-0.50993	-0.46488	-0.46054	-0.35895	-0.37398	-0.44611	-0.59352	-0.4917	-0.54798	-0.69919	-0.4989	-0.63399	-0.49012	-0.55275		0.7725	shmDia1+3 + DMSO vs. shmDia1+3 + EHT 1864				< 0.0001	shCTR + Rac1-CA vs. shmDia1+3 + Rac1-DN
				37.842	0.841993	0.785411	0.873037	0.960419	0.843071	0.842486	0.359962	0.536184	0.509002		40	-0.33948	-0.26031	-0.31909	-0.28396	-0.26622	-0.18668	-0.15323	-0.20733	-0.26966	-0.36977	-0.44298	-0.42001	-0.43723	-0.30595	-0.35723	-0.40123	-0.47233	-0.50381	-0.47796	-0.68204	-0.46707	-0.63244	-0.45433	-0.48693		0.3956	shCTR + EHT 1864 vs. shmDia1+3 + EHT 1864				0.0002	shmDia1+3 + Rac1-CA vs. shCTR + Rac1-DN
				18.921	0.920364	0.898403	0.948765	0.948681	0.859623	0.805653	0.42998	0.603863	0.557167		42	-0.27238	-0.24965	-0.26482	-0.32369	-0.25923	-0.10531	-0.15702	-0.17198	-0.31034	-0.34212	-0.38695	-0.41248	-0.46034	-0.28171	-0.34125	-0.4421	-0.5082	-0.48597	-0.45838	-0.58675	-0.47021	-0.58995	-0.40182	-0.48489							< 0.0001	shmDia1+3 + Rac1-CA vs. shmDia1+3 + Rac1-DN
				0	1	1	1	0.945083	0.903089	0.8043	0.497043	0.665267	0.619221		44	-0.2044	-0.20555	-0.18994	-0.32045	-0.24606	-0.04058	-0.11005	-0.09557	-0.27762	-0.2598	-0.31836	-0.35238	-0.39037	-0.25735	-0.34851	-0.40597	-0.36776	-0.39178	-0.38233	-0.59417	-0.4673	-0.62143	-0.37292	-0.51251							0.1603	shCTR + Rac1-DN vs. shmDia1+3 + Rac1-DN
				-18.921	0.924168	0.910009	0.915543	0.973017	0.916014	0.788914	0.546637	0.739513	0.688689		46	-0.16216	-0.19708	-0.21917	-0.2341	-0.19156	-0.06806	-0.11656	-0.07399	-0.22047	-0.29887	-0.32116	-0.36067	-0.44051	-0.24256	-0.29453	-0.34829	-0.43939	-0.42868	-0.37266	-0.55104	-0.43794	-0.54458	-0.34444	-0.44656
				-37.842	0.833378	0.820085	0.834516	0.936299	1	0.810603	0.616057	0.816822	0.741725		48	-0.11045	-0.20906	-0.18353	-0.19467	-0.15204	-0.10087	-0.05553	-0.06009	-0.19252	-0.31649	-0.19405	-0.37905	-0.40962	-0.22811	-0.27619	-0.32891	-0.42868	-0.41472	-0.29982	-0.51993	-0.35016	-0.5256	-0.32825	-0.46608
				-56.763	0.734685	0.685647	0.731634	0.928529	0.965499	0.847045	0.710787	0.870325	0.796832		50	-0.10012	-0.18038	-0.16081	-0.19398	-0.16536	-0.04193	-0.08227	-0.05378	-0.22832	-0.31152	-0.21481	-0.31975	-0.44017	-0.21382	-0.25853	-0.33706	-0.45933	-0.39864	-0.32718	-0.51988	-0.3813	-0.57315	-0.29825	-0.37579
				-75.684	0.599865	0.537848	0.605993	0.936662	0.892081	0.808003	0.793847	0.918001	0.860528		52	-0.07375	-0.16099	-0.16178	-0.16276	-0.12239	-0.07507	-0.06903	-0.01863	-0.20529	-0.31179	-0.17227	-0.28903	-0.46105	-0.2203	-0.23475	-0.31007	-0.40233	-0.4343	-0.33394	-0.54807	-0.40607	-0.56262	-0.26901	-0.46121
				-94.605	0.486279	0.422092	0.509605	0.939008	0.844497	0.842287	0.894495	0.972069	0.91114		54	-0.11606	-0.12863	-0.13536	-0.25435	-0.15814	-0.09776	-0.07553	-0.02003	-0.18426	-0.29819	-0.10563	-0.32061	-0.46287	-0.2343	-0.24543	-0.291	-0.52232	-0.38964	-0.27788	-0.56022	-0.33478	-0.51646	-0.30967	-0.42077
				-113.526	0.412023	0.337416	0.41803	0.938554	0.84541	0.833589	0.94223	1	0.949569		56	-0.07013	-0.17433	-0.1154	-0.1873	-0.10246	-0.05527	-0.0692	0.000402	-0.2877	-0.3131	-0.15523	-0.28984	-0.48499	-0.24121	-0.25663	-0.32464	-0.45223	-0.39598	-0.32951	-0.45843	-0.34545	-0.46891	-0.26788	-0.42175
				-132.447	0.350368	0.264855	0.371574	0.983636	0.787885	0.868082	0.98335	0.993818	0.97842		58	-0.04192	-0.17472	-0.07194	-0.12146	-0.08026	-0.13678	-0.03136	-0.03468	-0.2313	-0.31911	-0.14362	-0.30608	-0.44847	-0.21103	-0.22117	-0.26151	-0.53241	-0.40165	-0.37754	-0.56067	-0.44571	-0.64678	-0.24781	-0.39542
				-151.368	0.313153	0.216778	0.319101	0.990731	0.779287	0.90496	1	0.986941	1		60	-1.7e-05	-0.14167	-0.11263	-0.11368	-0.0986	-0.10671	-0.04719	-0.01331	-0.22352	-0.26372	-0.04826	-0.39476	-0.47336	-0.23532	-0.25347	-0.33858	-0.52136	-0.37512	-0.32732	-0.43079	-0.36481	-0.54981	-0.23755	-0.44965
				-170.289	0.27803	0.195546	0.275755	0.97382	0.802201	0.909727	0.971326	0.954705	0.996167		62	0.009468	-0.1523	-0.09686	-0.18064	-0.09439	-0.07854	-0.06514	-0.00449	-0.22416	-0.21237	-4.6e-05	-0.33549	-0.45679	-0.21482	-0.25334	-0.29891	-0.47589	-0.33377	-0.35787	-0.45385	-0.38563	-0.60706	-0.3025	-0.44624
				-189.21	0.250961	0.18957	0.251308	0.997858	0.761499	0.958818	0.964134	0.892028	0.970094		64	0.072857	-0.12052	-0.10179	-0.07988	-0.10617	-0.09159	-0.0645	-0.01967	-0.26297	-0.19806	0.046966	-0.29314	-0.50238	-0.25982	-0.28339	-0.29905	-0.49348	-0.339	-0.30636	-0.48053	-0.34149	-0.43952	-0.29333	-0.41458
				-208.131	0.231925	0.179869	0.217682	0.969887	0.756068	0.988704	0.920665	0.825314	0.917923		66	0.01745	-0.16736	-0.04603	-0.07695	-0.08882	-0.16857	-0.04684	-0.00182	-0.25104	-0.34131	0.052115	-0.4012	-0.42993	-0.24731	-0.31074	-0.35685	-0.57567	-0.36094	-0.30037	-0.46941	-0.34152	-0.56441	-0.29488	-0.46035
				-227.052	0.218303	0.162826	0.213953	0.974062	0.774421	0.992691	0.862378	0.759612	0.858639		68	0.019573	-0.1486	-0.08713	-0.10537	-0.09408	-0.15202	-0.0102	-0.04785	-0.21149	-0.29876	-0.0254	-0.39639	-0.48382	-0.30106	-0.27465	-0.30531	-0.53619	-0.35443	-0.35395	-0.50493	-0.38608	-0.50834	-0.26677	-0.49776
				-245.973	0.205742	0.157867	0.210381	0.923931	0.781619	1	0.791927	0.698874	0.783848		70	0.066048	-0.10305	-0.11042	-0.09753	-0.09765	-0.16434	-0.03879	-0.02904	-0.29279	-0.2693	0.096894	-0.39347	-0.51553	-0.30373	-0.27202	-0.31506	-0.52522	-0.34472	-0.30018	-0.5522	-0.4049	-0.53384	-0.22337	-0.43924
				-264.894	0.201811	0.146312	0.20187	0.934624	0.796341	0.963797	0.726595	0.635755	0.715704		72	0.063099	-0.15041	-0.06245	-0.18913	-0.07584	-0.13771	-0.08161	0.0085	-0.24813	-0.2954	0.157802	-0.37416	-0.50884	-0.2826	-0.28891	-0.30608	-0.60029	-0.34424	-0.38025	-0.50437	-0.39302	-0.52007	-0.29315	-0.42185
				-283.815	0.196571	0.149917	0.194835	0.954581	0.811321	0.95698	0.666603	0.566619	0.653204		74	0.023802	-0.12419	-0.13777	-0.18616	-0.1095	-0.15576	-0.06773	-0.03355	-0.22383	-0.37157	0.151928	-0.39488	-0.51251	-0.30679	-0.28231	-0.28634	-0.67115	-0.35563	-0.28714	-0.52294	-0.37387	-0.52166	-0.303	-0.4289
				-302.736	0.189323	0.15267	0.204178	1	0.799606	0.938312	0.603117	0.517253	0.590832		76	0.117817	-0.16556	-0.10951	-0.13526	-0.08923	-0.0653	-0.08805	0.002184	-0.33228	-0.26844	0.154444	-0.38601	-0.51555	-0.29686	-0.29294	-0.34762	-0.55722	-0.33588	-0.36237	-0.63624	-0.37944	-0.55961	-0.31796	-0.4535
				-321.657	0.181339	0.154716	0.214143	0.956483	0.760469	0.906793	0.557462	0.466224	0.542223		n=	5	7	4	4	5	6	9	6	5	4	3	6	5	10	6	6	3	7	2	4	6	6	10	5
				-340.578	0.176131	0.160608	0.205101	0.94673	0.758105	0.904897	0.519153	0.415191	0.502895			46								45								43
				n =	29	25	25	29	25	25	29	25	25
					79			79			79
[truncated: 2 more columns]
