# Supplementary material for: Rho GTPase signaling and mDia facilitate endocytosis via presynaptic actin
Source: eLife journal article supplement (doi:10.7554/elife.92755), 2023-12-05
Supplement: fig6-figsupp1-data4 [file elife-92755-fig6-figsupp1-data4-v1.zip]

## Sheet: Figure 6 S1
	Figure 6 S1C			Figure 6 S1D					Figure 6 S1E																				Figure 6 S1F							Figure 6 S1G			Figure 6 S1I
				Fmax/F0 [Syph-pH; 40Hz5s]						norm. ΔF [Syph-pH; 40Hz5s]																			Fmax/F0 [Syph-pH; 40Hz5s]							Cdc42-GTP/total Cdc42				relative intensity
	presynaptic F-Actin			shCTR + DMSO	shmDia1+3 + DMSO	shCTR + EHT 1864	shmDia1+3 + EHT 1864		time [s]	shCTR			shmDia1+3			shCTR + Rac1-CA			shmDia1+3 + Rac1-CA			shCTR + Rac1-DN			shmDia1+3 + Rac1-DN				shCTR	shmDia1+3	shCTR + Rac1-CA	shmDia1+3 + Rac1-CA	shCTR + Rac1-DN	shmDia1+3 + Rac1-DN		shCTR	shmDia1+3		distance [nm]	Bassoon			Cdc42			Homer1
	DMSO	EHT 1864		1	0.652709	1.03929	1.03944		0	0.039682	0.037843	0.043403	0.019322	0.010381	0.018842	0.003607	-0.04321	0.029647	-0.00936	0.024986	0.029726	0.007201	0.112197	0.107699	-0.0115	0.064965	0.016726				1.62585	1.71965	1.38942	1.34895		1	4.29648		416.262	0.206044	0.153775	0.0836899	0.37376	0.434399	0.26437	0.105926	0.107804	0.087806
	124.879	47.3416		1	2.37451	1.55383	1.27101		2	-0.02899	-0.01358	-0.03407	-0.00218	-0.01537	-0.00996	-0.0129	-0.03719	-0.01347	-0.0103	-0.00987	-0.02057	0.001177	-0.00851337	-0.03802	0.001719	-0.01941	-0.01598		1.34139	1.54152	1.10617	1.40988	1.12497			1	2.00923		397.341	0.203625	0.15482	0.0895821	0.392435	0.418708	0.263425	0.114572	0.107841	0.081704
	118.271	95.7404		1	0.828056	0.726658	0.803404		4	-0.00679	-0.01657	-0.01265	-0.01572	0.000343	-0.00439	0.002725	-0.07995	-0.0131	0.004431	-0.01404	-0.0104	0.013771	-0.0420852	0.000454	-0.00309	-0.0185	-0.00483		1.34396	1.44332			1.13997	1.14691		1	3.78626		378.42	0.203586	0.152961	0.0916053	0.380167	0.433794	0.275523	0.122845	0.1066	0.081484
	85.5981	54.4445		1	0.952587	1.02339	0.656323		6	-0.0039	-0.00769	0.003316	-0.00142	0.004643	-0.00449	0.006572	0.062396	-0.00308	0.015229	-0.00108	0.001245	-0.02215	-0.0615981	-0.07013	0.012866	-0.02705	0.004092		1.35246		1.43775	1.42623				1	1.56185		359.499	0.206986	0.161371	0.0920116	0.416466	0.440691	0.249889	0.121637	0.105336	0.076098
	79.4863	46.3505		1	1.1798	0.951688	0.915745		8	0.000725	-0.0245	-0.02075	-0.02032	0.010115	-0.00201	0.013926	0.285541	-0.01204	0.001148	-0.01134	0.036561	-0.01928	-0.05597	-0.08284	0.021225	0.088205	0.00525			1.60202				1.49941		1	1.60954		340.578	0.219284	0.165442	0.0920415	0.439979	0.471154	0.226579	0.12905	0.105751	0.076536
	148.17	142.653		1	0.623691	0.299828	0.541329		10	0.399633	0.245799	0.234697	0.32396	0.309644	0.309852	0.234978	0.617736	0.196146	0.268221	0.248911	0.202686	0.340533	0.589955	0.022411	0.179138	0.255745	0.263471												321.657	0.232123	0.181433	0.0972711	0.455642	0.446149	0.212847	0.135097	0.104557	0.069088
	176.879	109.946		1	0.666383	0.346139	0.541917		12	0.732847	0.655151	0.63981	0.736603	0.668588	0.732598	0.614635	0.841241	0.656636	0.688788	0.692019	0.646549	0.783702	0.860444	0.428587	0.554226	0.680741	0.67657		One-way ANOVA with Tukey's post test							One sample t-test			302.736	0.245115	0.19999	0.0994766	0.458958	0.423774	0.205869	0.133897	0.10144	0.070769
	91.8751	161.748		1	0.915535	0.830233	0.944496		14	0.922735	1	0.995433	1	1	0.983961	0.948876	1	1	0.98897	1	1	0.974611	1	0.830196	0.905173	0.916496	0.982819		p-value							p = 0.0459			283.815	0.256046	0.2102	0.103751	0.480843	0.449455	0.218438	0.130999	0.105686	0.074407
	101.29	112.391							16	0.80439	0.887115	0.894603	0.937324	0.885244	0.930193	0.931919	0.966729	0.882091	0.942157	0.873679	0.881346	0.943712	0.955829	1	0.985654	0.956025	0.982524		0.534	shCTR vs. shmDia1+3									264.894	0.268399	0.22453	0.118025	0.504539	0.445279	0.28108	0.132291	0.105055	0.072909
	253.953	75.5549		one sample Wilcoxon test					18	0.651869	0.762913	0.789411	0.827977	0.807591	0.857219	0.874104	0.811734	0.723453	0.865805	0.73557	0.778115	0.890824	0.871448	0.949475	0.971426	0.860177	0.926013		0.9968	shCTR vs. shCTR + Rac1-CA									245.973	0.282416	0.24127	0.120254	0.503636	0.461393	0.29023	0.135829	0.108009	0.074703
	174.302	174.764		p-value					20	0.570575	0.623247	0.667186	0.77262	0.712772	0.777756	0.781457	0.749182	0.582073	0.752922	0.608902	0.629577	0.864778	0.709617	0.914422	0.920334	0.722903	0.873646		0.5834	shCTR vs. shmDia1+3 + Rac1-CA									227.052	0.301444	0.270955	0.137075	0.514976	0.505272	0.328314	0.135998	0.106193	0.079781
	31.223	92.734			0.4609	0.25	0.1094		22	0.468426	0.569779	0.592412	0.707464	0.64439	0.700315	0.729571	0.577232	0.499551	0.637537	0.521266	0.526634	0.804016	0.690896	0.844707	0.875249	0.63818	0.808633		0.7985	shCTR vs. shCTR + Rac1-DN									208.131	0.329888	0.297422	0.151695	0.528304	0.538756	0.295139	0.141099	0.117278	0.084244
	69.5092	51.5042							24	0.421706	0.489783	0.475205	0.64121	0.591854	0.64014	0.662689	0.464309	0.419546	0.549321	0.43554	0.419153	0.756133	0.642775	0.781193	0.822994	0.611727	0.739733		> 0.9999	shCTR vs. shmDia1+3 + RAC1-DN									189.21	0.36462	0.338745	0.172201	0.559802	0.552142	0.321557	0.146897	0.125193	0.097181
	129.008	72.1522							26	0.375683	0.439664	0.418777	0.594737	0.528553	0.584947	0.575124	0.440411	0.374067	0.456969	0.376654	0.3252	0.650386	0.604541	0.728338	0.785436	0.586314	0.688596												170.289	0.402703	0.3802	0.197482	0.546099	0.569597	0.357245	0.150611	0.137536	0.099521
	64.2564	31.1932							28	0.360344	0.369558	0.386108	0.561716	0.489907	0.529409	0.525896	0.32287	0.289193	0.399365	0.323541	0.300021	0.601034	0.542412	0.661741	0.740344	0.623651	0.634334												151.368	0.425686	0.434695	0.224504	0.55582	0.610053	0.340186	0.160013	0.163612	0.114389
	66.8663	71.8879							30	0.270702	0.287637	0.344349	0.489291	0.448699	0.483029	0.470342	0.242614	0.281064	0.338513	0.295033	0.214207	0.551309	0.433241	0.641783	0.688402	0.520622	0.595035												132.447	0.476478	0.485853	0.269001	0.575019	0.640905	0.377828	0.173006	0.172096	0.14453
	156.99	135.153							32	0.257228	0.260586	0.271748	0.491378	0.408153	0.445112	0.415342	0.216099	0.23633	0.284477	0.279448	0.19312	0.51711	0.48971	0.551466	0.651521	0.51934	0.542231												113.526	0.530806	0.550596	0.33547	0.619146	0.713936	0.458634	0.188662	0.20207	0.162119
	93.0314	162.805							34	0.205872	0.230266	0.236106	0.444828	0.383334	0.408693	0.384225	0.166343	0.204781	0.243565	0.254991	0.137985	0.473251	0.443375	0.498512	0.624066	0.527484	0.507038												94.605	0.600001	0.636228	0.412505	0.6448	0.764384	0.500697	0.210282	0.242651	0.203998
	97.5904	36.7038							36	0.205856	0.154452	0.222289	0.406557	0.354316	0.382752	0.331206	0.086811	0.174134	0.218187	0.23502	0.101148	0.475145	0.423379	0.533709	0.575954	0.507086	0.470093												75.684	0.682333	0.752136	0.533589	0.698636	0.817457	0.573656	0.24589	0.292867	0.258013
		39.1155							38	0.140889	0.153445	0.185394	0.382286	0.31248	0.350993	0.29475	0.087449	0.14572	0.200068	0.204164	0.053575	0.408818	0.363132	0.421779	0.541992	0.458175	0.431561												56.763	0.764149	0.832595	0.6441	0.796111	0.903574	0.700769	0.289553	0.346507	0.308209
		38.3886							40	0.10662	0.093179	0.126228	0.36852	0.285647	0.325104	0.265991	0.072221	0.113517	0.165864	0.194156	0.065451	0.423284	0.363783	0.422924	0.521736	0.430462	0.390747												37.842	0.844277	0.925963	0.782628	0.854567	0.969303	0.795897	0.332105	0.402934	0.390476
		71.3923							42	0.091242	0.054748	0.089923	0.332462	0.280761	0.307658	0.234085	0.089892	0.101654	0.149626	0.189695	0.03884	0.39149	0.386936	0.443209	0.489737	0.486089	0.360195												18.921	0.920624	1	0.907864	0.917782	1	0.874407	0.379437	0.479104	0.4631
		51.6694							44	0.054416	0.044922	0.119632	0.314063	0.229584	0.279202	0.184405	-0.03424	0.079753	0.131036	0.167401	0.019194	0.349488	0.361056	0.344574	0.461279	0.465779	0.345834												0	1	0.906845	1	0.961436	0.966442	0.923057	0.430394	0.566609	0.579034
		47.2094							46	0.031091	0.015175	0.073974	0.26069	0.243182	0.26118	0.171263	-0.0437	0.036998	0.099111	0.145634	-0.0143	0.322921	0.357879	0.285299	0.431182	0.446542	0.302856												-18.921	0.937208	0.830439	0.903354	1	0.894978	1	0.511407	0.653848	0.670205
		61.7456							48	0.023628	-0.02639	0.063564	0.270872	0.208349	0.244253	0.145892	-0.09002	0.034094	0.093369	0.147078	8.94e-05	0.298324	0.301049	0.299262	0.415217	0.470473	0.289518												-37.842	0.862291	0.718362	0.812945	0.915608	0.866655	0.90414	0.582267	0.745324	0.772186
		96.3681							50	-0.00374	-0.04657	0.045246	0.243642	0.196837	0.223902	0.097864	-0.1493	0.031695	0.074355	0.12585	-0.04211	0.25443	0.239257	0.276111	0.388065	0.537649	0.26698												-56.763	0.754879	0.605816	0.66071	0.872219	0.807718	0.828396	0.658044	0.815695	0.866532
		105.883							52	-0.0576	-0.04066	0.009293	0.252061	0.173255	0.212917	0.07614	-0.12455	0.014035	0.046847	0.111119	-0.03425	0.262109	0.280411	0.195391	0.354937	0.543	0.242967												-75.684	0.640669	0.502959	0.53311	0.822728	0.787273	0.760548	0.747729	0.902066	0.93448
	78.1648	25.4482							54	-0.05935	-0.06208	0.001	0.19949	0.154582	0.19516	0.060745	-0.15114	-0.04422	0.051487	0.100878	-0.06701	0.227758	0.282422	0.160084	0.339422	0.447077	0.22235												-94.605	0.515342	0.438788	0.448787	0.745878	0.763051	0.694396	0.836777	0.955624	0.985364
	92.8662	29.0657							56	-0.05774	-0.10994	0.01438	0.20772	0.141251	0.178754	0.034429	-0.11482	-0.03863	0.055334	0.093803	-0.08318	0.23519	0.27849	0.176612	0.289163	0.442308	0.209493												-113.526	0.425908	0.372471	0.374413	0.684159	0.753146	0.63546	0.903923	1	1
	77.2728	24.6751							58	-0.06807	-0.08435	-0.01567	0.191824	0.133938	0.162108	0.027325	-0.15112	-0.07265	0.027207	0.089124	-0.07842	0.17008	0.27639	0.102945	0.275901	0.471383	0.197518												-132.447	0.348475	0.326631	0.31693	0.632941	0.74174	0.66602	0.968595	0.984673	0.964657
	130.66	19.6932							60	-0.09262	-0.10849	-0.01848	0.15148	0.11476	0.146966	-0.00215	-0.11962	-0.09896	0.017601	0.092115	-0.0837	0.147932	0.334872	0.029204	0.245526	0.359469	0.180156												-151.368	0.302461	0.299963	0.26474	0.619891	0.745914	0.585284	0.989361	0.978526	0.888646
	47.0773	18.2627							62	-0.0809	-0.12469	-0.02519	0.143872	0.088496	0.14335	-0.01688	-0.0857	-0.09003	-0.0024	0.057382	-0.08696	0.135172	0.270757	0.018538	0.221475	0.263503	0.17822												-170.289	0.271544	0.278606	0.231768	0.619659	0.748701	0.53195	0.993936	0.926154	0.801474
	51.4381	29.5414							64	-0.14684	-0.13741	-0.03743	0.133314	0.096185	0.133581	-0.01785	-0.10898	-0.07786	0.00087	0.059924	-0.09391	0.128465	0.252766	0.039969	0.217235	0.323617	0.152349												-189.21	0.239123	0.255245	0.209488	0.607534	0.764347	0.520882	1	0.88721	0.713499
	60.7875	15.5438							66	-0.10578	-0.17022	-0.06622	0.098363	0.08616	0.122129	-0.03644	-0.10283	-0.11094	-0.00483	0.035851	-0.11385	0.14521	0.298451	0.05291	0.191693	0.279504	0.144658												-208.131	0.217794	0.243185	0.18899	0.580623	0.740824	0.453024	0.950623	0.833635	0.607109
	55.799	13.6739							68	-0.18779	-0.18805	-0.05994	0.091269	0.0622	0.113332	-0.05167	-0.00209	-0.1565	-0.0183	0.035745	-0.11054	0.149174	0.209701	0.000552	0.17207	0.201159	0.143142												-227.052	0.212238	0.227087	0.162281	0.605348	0.72618	0.404524	0.895338	0.757486	0.507358
	79.9818	30.9389							70	-0.17244	-0.20443	-0.08157	0.0478	0.045045	0.100427	-0.06026	0.047394	-0.11162	-0.02746	0.03084	-0.11514	0.120772	0.264416	-0.02708	0.131615	0.41061	0.130974												-245.973	0.201298	0.224076	0.15543	0.591991	0.699233	0.415722	0.825619	0.682441	0.427779
	83.3846	17.6912							72	-0.17109	-0.2247	-0.10115	0.03471	0.033049	0.085851	-0.08156	-0.01527	-0.13882	-0.03061	0.01814	-0.1244	0.126923	0.218378	-0.02454	0.125111	0.304578	0.121863												-264.894	0.200894	0.209364	0.142486	0.548993	0.649381	0.420524	0.735203	0.611635	0.355414
	76.3478	19.7097							74	-0.1883	-0.23082	-0.10731	0.028526	0.027423	0.077872	-0.08336	-0.02199	-0.15776	-0.03451	0.0142	-0.15226	0.111376	0.225205	-0.03642	0.123657	0.363382	0.102813												-283.815	0.201071	0.19184	0.134794	0.547698	0.63927	0.450843	0.648271	0.546145	0.305118
	103.041	38.686							76	-0.2253	-0.25513	-0.1256	0.021229	-0.00138	0.073971	-0.08807	-0.02199	-0.15005	-0.0244	-0.00485	-0.14816	0.122615	0.201005	-0.07296	0.134551	0.245054	0.094037												-302.736	0.199431	0.190081	0.128871	0.552642	0.600372	0.403643	0.582019	0.477593	0.271497
		13.6243							78	-0.26848	-0.28023	-0.14725	0.000884	-0.00689	0.062734	-0.1014	-0.02199	-0.17938	-0.03071	0.008142	-0.14736	0.107183	0.238324	-0.06153	0.064819	0.326628	0.082249												-321.657	0.188612	0.184942	0.125277	0.526671	0.609807	0.381376	0.508632	0.414187	0.240834
		33.0367							n =	4	5	3	6	5	12	5	2	3	6	5	3	5	1	3	3	2	8												-340.578	0.191079	0.173287	0.131606	0.522148	0.602337	0.387599	0.430647	0.358948	0.206913
		25.9371								12			23			10			14			9			13														n =	27	38	31	27	38	31	27	38	31
		40.536																																						96			96			96
		21.6886
		20.6479
		20.714
		48.0354
n =	30	46
	D'Agostino & Pearson test
	p-value
	0.0007	0.0044
	One sample Wilcoxon test
	p < 0.0001
[truncated: 23 more columns]
