# Supplementary material for: Rho GTPase signaling and mDia facilitate endocytosis via presynaptic actin
Source: eLife journal article supplement (doi:10.7554/elife.92755), 2023-12-05
Supplement: fig7-data1 [file elife-92755-fig7-data1-v1.zip]

## Sheet: Figure 7
	Figure 7B			Figure 7C			Figure 7D					Figure 7E
	Invaginations/µm2			ELVs/µm2			Invaginations/µm2					ELVs/µm2
	shCTR	shmDia1+3		shCTR	shmDia1+3		shCTR + DMSO	shmDia1+3 + DMSO	shCTR + EHT 1864	shmDia1+3 + EHT 1864		shCTR + DMSO	shmDia1+3 + DMSO	shCTR + EHT 1864	shmDia1+3 + EHT 1864
	3.63134	3.74686		1.81567	2.49791		0.830565	0.97371	2.29358	1.98807		4.98339	5.84226	1.52905	1.98807
	0.8328	0		0.8328	1.96082		0	1.88679	1.14025	1.52905		4.15973	3.77358	3.42075	2.29358
	0	0		0	0		0	1.37363	1.18906	3.75		0	1.37363	0	3.75
	0	1.6908		0	4.22699		0	1.02354	0	1.49925		0	1.02354	0	2.9985
	2.9734	0		0	3.74967		4.61894	0	0.894454	1.3947		4.61894	0.825764	0	2.7894
	0	1.11696		1.82663	0		0	0	1.04167	1.5748		0	0	0	4.72441
	0	0		0	1.07132		1.24688	0	2.26415	3.11042		0	0	1.50943	3.11042
	0	1.94569		0	7.78277		0	0	0	1.3459		0.972763	4.65839	0	5.38358
	0	1.82137		0	7.28548		1.8797	0	0	1.3459		3.7594	2.24215	0	11.7955
	1.60818	1.82137		0	0		0.558347	0	1.33333	0.929368		0.558347	0.504541	1.33333	0.929368
	0	0		1.2242	4.02038		0.598444	0.903342	2.93255	0.880282		2.99222	0.903342	0	0.880282
	0	0		1.57155	6.69263		4.06504	0	1.13636	0		2.03252	0	1.13636	0
	1.62034	5.57719		1.62034	0		0	2.0436	0	1.86916		4.01606	2.0436	5.98802	1.86916
	0	0		0	2.94434		1.34409	0	4.31034	7.05882		5.37634	0.825764	0	0
	1.3882	2.94434		5.55281	1.1781		0.755287	0	1.98807	3.09119		6.0423	2.5641	0	3.09119
	0	0		0	4.10928		0	0	3.46921	5.14801		0	2.50627	1.73461	1.287
	0	0		2.01861	2.73279		1.03627	1.33869	0	0		4.14508	4.01606	0	0
	0.72015	0		1.4403	2.64589		2.39234	0.928074	3.58744	2.89855		0	6.49652	1.79372	0
	1.22957	0		0	5.86434		1.41844	0.379507	0	0		8.51064	4.17457	0.527704	0
	2.22408	1.17287		0	0		0	1.287	0	4.04858		0	6.43501	0.906618	1.34953
	0	2.42106		0	1.55993		3.09119	1.09769	0	3.31126		4.63679	0	0	0
	0	0.519978		0	1.31467		2.98507	3.42466	0.778816	0		0	3.42466	1.55763	6.41026
	0	0		0	0		1.64474	3.84986	2.30415	0		1.64474	5.77478	0	6.72948
	0	0		2.05748	0		0	3.66748	1.54321	10.8401		0	6.11247	3.08642	5.42005
	3.00369	1.26043		0	1.42125		0	0	1.24378	1.4771		2.1097	1.31926	1.86567	2.95421
	0	0		0	1.28253		2.45399	0.597372	3.31126	5.78035		3.68098	0.597372	0	2.89017
	0	1.28253		0	0		0	1.67785	0.773994	2.33645		1.97824	5.03356	0.773994	0
	0	1.61597		4.51279	0		0	0.881834	1.49365	4.6729		0	3.52734	3.73413	0
	2.02789	0		0	0		0	0	0	3.87597		0	5.76037	1.56006	13.5659
	0	0		0	4.40966		0	1.10132	0	1.41044		0	5.50661	4.44939	1.41044
	5.8263	1.46989		1.9421	1.72452		0	1.11111	3.27154	0		0	0	8.7241	0
	2.55137	0		0.850458	0		3.22581	2.1978	1.19474	1.21951		1.6129	0	10.7527	7.31707
	4.66357	0		4.66357	0		0	3.1746	5.47945	0		0	0	8.21918	2.98063
	0	2.44838		1.72984	0		0	0	0	0.934579		2.71739	1.05374	2.01207	8.41121
	0	0		0	0		2.47525	2.7248	0	3.85356		0	6.81199	17.341	0
	0	0		1.18518	1.53665		0	0	1.99402	1.13379		11.2994	7.72798	3.98804	2.26757
	0	0		0	2.13557		5.78035	0	1.64926	1.40056		0	2.86944	1.09951	5.60224
	0	0.711855		1.76948	3.09236		1.44509	1.5625	6.99301	0		1.44509	4.6875	0	2.56082
	0	3.09236		0	6.43022		0	0.968992	1.99601	1.28535		3.70828	12.5969	1.99601	1.28535
	1.45136	0		0	0		0.626174	1.44823	5.24934	0		0.626174	4.34468	9.18635	6.38978
	0	1.51305		0	1.66737		0	0	0	0		3.93701	0	0	2.14133
	0	0		4.18841	3.6676		0	0.543183	1.83993	1.07875		2.25225	1.62955	1.83993	3.23625
	0	0		1.17894	0		0	0	1.26103	2.10084		5.84795	0	3.7831	10.5042
	0	0.74297		2.84447	0		0.588235	3.26797	3.12175	1.54083		0	6.53595	5.20291	7.70416
	0	0		0	0		0	0.765111	2.20264	3.58423		4.63679	13.772	4.40529	0
	2.90444	0		2.90444	4.87114		0	0	0	3.44828		0	0	0	3.44828
	2.20739	4.87114		0	2.24848		0	1.34409	5.997	2.09205		2.00803	0	2.9985	4.1841
	0	0		1.62779	1.31667		0	0	0.558036	1.37741		3.85109	0	4.46429	1.37741
	0	0.438891		0.873462	1.11535		0	0.899281	0.467071	1.3459		3.56295	7.19424	0.934143	2.69179
	0	0		14.6972	3.47988		1.76367	1.75131	5.30504	1.54799		1.76367	1.75131	5.30504	3.09598
	0.907283	0		0	0		2.48756	0	3.4965	0.843882		3.73134	2.22965	3.4965	10.9705
	0.868339	3.66122		0.868339	0		0.660066	1.11732	1.90658	0		0	3.35196	3.81316	4
	0	0		1.24408	1.54883		0	0.657895	2.98507	0		0	3.28947	2.98507	3.71747
	0	1.54883		0	0		0	0	1.51172	1.57978		4.5045	1.93175	0	0
	1.4257	0		4.27711	2.40537		1.32802	1.41443	2.74725	1.19474		5.31208	5.65771	1.37363	5.97372
	0	2.40537		0	9.65579		0	0	0	2.29358		2.84091	3.93701	1.01112	13.7615
	0	3.2186		0	0.993237		0	0	2.442	0		2.36407	6.21762	0	9.12409
	0	0.993237		3.30809	0		1.23916	1.95695	1.1534	0		6.19579	0	3.46021	0
	0	0		0	3.06631		2.26757	1.13379	0	0		2.26757	1.13379	0	1.4245
	2.64874	0		2.64874	1.63636		0	0	1.15607	7.59494		0	4.89237	1.15607	0
	0	0		1.79207	4.74894		0	1.5015	0	1.57233		0	0	9.61538	4.71698
	0	0.949789		0	0		0	2.25225	0.927644	3.33333		2.73598	3.37838	1.85529	3.33333
	0	4.4677		0	1.77946		5.32623	1.83993	1.90476	2.18818		3.99467	8.27967	1.90476	13.1291
	0	0		2.78979	0.653871		0	1.98807	2.32288	1.09409		0	1.98807	0
	0	0.653871		0	0		0	0.625391	2.23214	3.04878		0	0	8.92857	3.04878
	0	0		1.63006	0		3.10078	1.28949	1.5015	0.837521		0	0.644745	1.5015	2.51256
	0	0		0	1.73261		0.95057	2.1645	1.39276	1.69205		0.95057	6.49351	0	3.38409
	0	1.73261		0	0		0	0	0	0		4.40529	4.29185	5.60224	1.84162
	0	0		4.32627	0		0	0.919118	3.26264	1.37836		3.01205	0	0	4.13508
	1.02299	0.739264		1.02299	0		3.78072	0	0	2.73598		0	3.04723	2.77008	5.47196
	0	0		0	6.31636		0	1.41443	0	4.1841		0	14.1443	5.44465	4.1841
	0	2.10545		0	2.02025		2.29885	4.45434	0	3.86847		0	4.45434	0.553403	3.86847
	0	1.01012		0	0		0	1.13379	0	1.95312		0	4.53515	2.079	1.95312
	0	0		0	9.2649		0	3.13972	0	0		0.987167	3.13972	1.62866	0.659196
	0	0		0	1.95554		0	3.92927	0.647249	1.15741		0	5.89391	3.8835	12.7315
	0	0		0	0		0	0.948767	3.92157	1.76056		0	8.5389	0.980392	3.52113
	1.26717	1.77117		0	0		0	1.34409	5.89971	1.40056		3.14465	5.37634	0	0
	0	1.4663		2.1105	2.3181		0	0	1.76678	2.08768		4.329	0.524384	0	2.08768
	0	0		2.38702	0		0	0	1.39665	7.59013		3.34448	0	4.18994	5.6926
	0	0		7.26938	0		1.81818	0.874891	2.27015	3.04414		3.63636	1.74978	7.94552	0
	0.956007	0		0	3.66147		2.1978	0.881057	3.66972	2.50941		2.1978	7.04846	1.83486	1.25471
	0	0		0	4.9466		2.26757	2.48293	2.94551	1.16279		2.26757	6.20732	5.89102	5.81395
	0	1.64887		3.13557	4.99587		0	1.19808	0.808407	4.914		1.66113	3.59425	0.808407	17.199
	0	1.66529		2.52514	2.65311		3.70828	1.23457	0.988142	1.30208		3.70828	1.23457	4.94071	19.5312
	0	0		0	0		1.13636	0	0	2.15983		1.13636	0	0.773395	1.07991
	0	1.63753		1.10551	4.61537		3.9267	0	4.78469	1.41243		3.9267	0	0	2.82486
	0	6.15383		1.93122	0		0	0	1.5625	1.30804		7.79727	0	7.8125	2.61609
	1.19286	0		0	0		0	1.5528	4.42478	0		5.41516	0	13.2743	0
	1.79996	0		1.79996	0		1.17371	2.47525	1.86393	0		4.69484	1.23762	0	4.74752
	0.705493	0		2.82197	13.7439		0	0	0.868056	0.494071		3.07692	7.46269	0	1.48221
	0	0.858996		1.11352	0		0	1.9685	0.775194	0		0	7.87402	0	4.111
	0	0		1.27348	0		0.87108	3.15789	1.75901	1.18624		3.48432	2.10526	0	7.11744
	0	0		0	0		1.34228	1.34409	3.81679	0		5.36913	0	2.54453	0.762195
	0.846012	3.87953		0	0.954586		0	0.729395	1.62075	3.6036		0.956023	1.45879	0	5.40541
	0	0		0	0		0	1.28535	0	0		4.12371	3.85604	0	9.8401
	0	0		1.95751	0		0	2.55754	1.65837	3.125		0	7.67263	16.5837	3.125
	0	1.18317		0	1.70717		0	0.877193	1.5625	1.321		0	3.50877	4.6875	1.321
	0.77227	0.569057		0.77227	4.87736		1.29032	0	0.994036	2.62123		5.80645	1.15607	0	5.24246
	0	4.87736		3.51123	1.12066		0.730994	0	1.45666	0		0.730994	3.42466	3.64166	0
	1.01223	2.24133		0	4.66887		0	2.41255	1.27714	6.34249		6.55308	0	1.27714	10.5708
	0	0		0	7.76188		0	0	3.79747	0.681199		0	3	1.26582	0
	0	0		0	0		0.933707	1.80018	2.92398	2.49688		0.933707	0	5.84795	18.7266
	0	0.777127		0	1.80637		0	2.52207	0	3.0581		3.06748	8.82724	0	0
	1.59779	0		0	0.847005		2.94118	0.901713	0	9.30233		11.7647	3.60685	0	9.30233
	0	0		0	3.02562		0	1.06045	5.52486	1.65837		0	2.12089	5.52486	0.829187
	1.49804	0		0	0		0	1.29702	0	5.36193		1.54202	0	0	18.7668
	0	0		2.33329	1.92644		0	0	1.69205	1.82815		0	0	5.07614	0
	1.42811	1.92644		0	0		3.10559	0.70922	0.69541	0		0	0.70922	3.47705	17.8926
	0	0		0	2.89809		0	0.967118	1.88679	0.694444		0.866551	0	0	2.08333
	0	0		1.15547	3.19646		0.866551	1.0395	3.35946	1.83486		0.97371	0	1.11982	1.83486
	1.09286	3.19646		0	16.1037		0.486855	0	2.63852	2.45098		4.00802	1.81818	0	0
	0	2.92794		0	11.0215		0	0	3.32779	0		1.1325	6.26566	0	0
	0	6.61291		2.18758	1.51303		0	3.36323	4.86224	1.01937		4.17537	2.24215	3.24149	0
	0	0		0	0.752862		0	0	4.60829	4.2796		2.42817	0	2.30415	1.42653
	1.14895	2.25859		0	4.30611		0	1.13379	0.898473	1.49813		0	3.40136	0	0.749064
	0	2.87074		0.86627	5.05747		1.99601	0.609013	2.00803	5.72519		1.99601	6.09013	6.0241	5.72519
	0	0		0	14.9698		2.886	0.995025	0	0		0	2.98507	0	0
	0	0		0	0		0	2.77393	3.07692	0.580383		2.5	9.70874	6.15385	3.4823
	0	0		3.78314	0		0.925069	1.04167	3.68098	0		1.85014	0	7.36196	3.26797
	0			0			0	0	0	3.63967		3.4965	2.40964	2.7933	0
	0			0			0	0	2.77008	0		0	3.97614	1.38504	0.65189
	0			0			0	2.55428	0.961538	0		0	1.27714	0	1.63934
	0			0			0	0	0	0		2.73224	4.94438	0	1.76471
	0			0			0	0	1.10865	0.83612		0	3.18979	0	6.68896
	0			0			0	1.57729	1.30378	2.82885		0.754148	1.57729	2.60756	8.48656
	0	1.7452		2.32597	0		0	0	3.1679	2.08551		0.909091	4.45236	3.1679	9.38478
	4.33918	0.606204		4.33918	1.81861		0	2.73973	0.62422	1.1655		0	2.73973	1.24844	3.4965
	1.26028	0.450985		0	1.35296		0	1.13766	1.93237	0		0	10.2389	5.7971	5.56328
	0	1.48604		1.26536	5.94414		0	2.70636	3.3389	5.01253		0	8.11908	3.3389	2.50627
	1.32872	0		0	0.903558		0	8.13008	0.722022	2.12465		0	5.42005	4.33213	12.7479
	0	1.54972		1.15792	4.64916		0	0.471032	0.69979	3.27869		3.43643	1.88413	2.09937	1.0929
	0.88086	3.57681		0	0		1.38313	2.54453	0	0		2.76625	0	3.24149	15.873
	0	0		0	1.17008		0	2.32288	1.16686	3.06748		1.16959	1.16144	0	0
	2.38888	1.92831		0	3.85661		0	1.58983	0.976562	3.37458		0	11.1288	7.8125	12.3735
	0	2.81226		1.18848	2.81226		0	1.7301	1.47059	0		0.930233	0	1.47059	0.993049
	1.22846	3.87686		1.22846	7.75372		1.17233	0.888889	1.79856	1.38313		11.7233	1.77778	0	2.07469
	0	1.02103		2.06965	0.510513		0	1.68634		0.701754		0	3.37268		2.80702
	1.72	1.61969		0.573334	6.47874		0	0		1.34771		2.0284	12.761		0
	0	0		0	1.005		1.52905	1.28535		1.94932		0	0		1.94932
	0	0		0	0		0	1.52788		0		0	2.29183		0
	0	1.5429		1.8793	3.0858		3.16456	1.65563		2.30681		4.74684	6.62252		6.92042
	0	4.90693		2.77671	14.7208		1.34048	1.51745		0		2.68097	6.0698		4.57317
	0	0		0	4.03618		0	3.06279		0.94697		0	1.53139		1.89394
	0	0		2.02216	5.6434		0			0		1.49477			9.29368
	0	0		2.98075	1.81134					1.70794					3.41588
	1.79317	0		0	0					1.75439					5.84795
	1.46365	1.91332		1.46365	0					1.66945					11.6861
	0	0		4.75882	5.53855					2.22222					20
	1.36785	0		0	0					0					12.945
	0	2.29015		2.37336	6.87045					0					1.67504
	0	0		0	7.63362					0					2.39234
	0	0		3.07348	0.490986					2.7972					1.3986
	0	0.950626		0.597687	1.90125					2.25225					6.75676
	0	2.84105		0	8.52316	n =	144	143	136	153	n =	144	143	136	152
	0	0		0	2.80895
	0	1.80585		0	3.6117		D'Agostino & Pearson test					D'Agostino & Pearson test
	1.08407	0		4.33627	4.21502		p-value					p-value
	1.13743	1.4832		3.4123	4.44961		< 0.0001	< 0.0001	< 0.0001	< 0.0001		< 0.0001	< 0.0001	< 0.0001	< 0.0001
	1.34762	0.993192		1.34762	0.993192
	0	0		0	0.78672		Kruskal-Wallis with Dunn's post test					Kruskal-Wallis with Dunn's post test
	0	0		0	0		p-value					p-value
	0	0		0	6.52158		0.0035	shCTR + DMSO vs. shmDia1+3 + DMSO				0.0135	shCTR + DMSO vs. shmDia1+3 + DMSO
	0.631789	0		1.26358	4.82129		< 0.0001	shCTR + DMSO vs. shCTR + EHT 1864				> 0.9999	shCTR + DMSO vs. shCTR + EHT 1864
	0	0.258221		5.65011	1.2911		< 0.0001	shCTR + DMSO vs. shmDia1+3 + EHT 1864				0.0002	shCTR + DMSO vs. shmDia1+3 + EHT 1864
	0	0		3.37117	0		0.0318	shmDia1+3 + DMSO vs. shCTR + EHT 1864				0.1154	shmDia1+3 + DMSO vs. shCTR + EHT 1864
	0	1.75668		2.78906	5.27003		0.0114	shmDia1+3 + DMSO vs. shmDia1+3 + EHT 1864				> 0.9999	shmDia1+3 + DMSO vs. shmDia1+3 + EHT 1864
	0	0.575567		2.89316	0.575567		> 0.9999	shCTR + EHT 1864 vs. shmDia1+3 + EHT 1864				0.0036	shCTR + EHT 1864 vs. shmDia1+3 + EHT 1864
	1.10189	0		0	1.95583
	0	2.02793		0	2.02793
	1.12556	0		0	1.68526
	0.661099	0		1.3222	2.83323
	0	1.07422		0	1.61133
	0.64093	0		0.64093	7.23667
	0	0		0	2.98118
	0.31055	0		0.93165	4.17814
	0	1.17346		1.39087	1.17346
	0	0		1.53081	3.39292
	0	1.84567		0	3.69135
	0	0		0	2.8733
	0	0		6.99511	0
	0	0		2.5018	1.73868
	1.52812	0		1.52812	1.2055
	0.512338	1.01657		1.53701	2.03314
	0	1.22187		1.63818	1.22187
	0	1.3851		13.1577	0
	0	0		0.865612	1.07132
	1.30633	0.500064		1.30633	0.500064
	0	0.933849		0.455603	1.40077
	0	1.1575		2.12048	3.4725
	0	0		4.42239	2.88496
	0	0		5.63341	0
	1.12911	0.590409		0	0.590409
	0	0.718633		1.09879	0.718633
	2.33714	1.6537		1.16857	0.826848
	0	0		1.25485	1.22757
	0.411486	1.57192		0.411486	1.57192
	0	2.14016		0.509133	5.3504
	0.753207	0.667144		0	0
	1.43249	1.07141		5.72997	0.535704
	0.380877	2.24699		1.52351	3.37048
	0	0.646887		0.92226	0
	0	0		0.952648	1.33698
	1.39634	0		0	0
	1.52216	0.414105		3.04432	3.72695
	0	0.614615		0	0
	0	0.740829		0.379437	0.740829
	1.75319	1.08365		0.876597	4.33462
	0	0		0	1.16034
	0	0		0	0
	1.33962	0.385722		1.33962	1.54289
	0	0		0	3.59407
	0	0		0.728599	1.70858
	0	0		0.80954	1.07272
	2.68279	1.68715		2.68279	0
	1.33352	0		2.00029	1.25938
	0	0		1.86545	0.5619
	0.472025	1.32232		1.41607	0.881549
	0.860451	0		0.860451	1.9166
	3.70691	2.06103		3.70691	3.09155
	0	1.44143		0	2.88285
	0	0		0	5.51536
	0	1.03833		0.947498	5.19163
	0	0.945273		0	0
	0	1.51528		0	0
	0	0		0.57314	0.565239
		0			2.85288
		1.23368			1.23368
		0.733012			0.733012
		0			4.55831
	0	0		1.9533	5.90235
	0	0		0	0
	0	3.20849		0.91371	4.27799
	0	1.07466		2.67643	3.22398
	0	0		0	5.31932
	0	0		2.2597	4.55424
	0	1.62103		1.99017	1.62103
	0	0		0	7.30877
	1.07011	1.19631		3.21033	11.9631
	0	6.24414		0	8.32552
	0	0		0	6.15825
	0	1.17278		0	3.51833
	0	0		1.89524	4.30845
	0	2.25802		2.02103	0
	0	0		2.28225	0
	0	0		2.18611	4.79132
	0	3.25315		0	8.13288
	0	1.11405		4.68162	3.34216
	1.43232	0.584003		0	4.67203
	0	1.73121		1.25539	3.46242
	0	0		3.15367	0
	0	0		0	6.84905
	3.0618	1.09301		1.0206	1.09301
	0	0.566165		5.95574	0
	1.05294	2.14289		2.10588	2.14289
	0	0		5.57999	3.94291
	0	0		3.41218	3.11271
	0	0		11.0839	4.75695
	0	0		2.01174	0
	0	0		0	0
	0	0		0	1.60579
	0	0		0	4.60754
	0	0		0	3.44257
	3.44847	0		4.31059	3.21907
	0	0		5.42453	11.5009
	0	0.753006		0	3.01202
	0	0		0	0
	0	0		1.76751	0
	0	0		0	2.61724
	1.47082	0		0	1.59313
	0.448043	0		2.68826	0
	1.03109	0		2.06217	3.70842
	0	0.708096		0	7.78905
	0	3.4164		2.06088	3.4164
	0	1.20701		1.43684	2.41401
	0	0		0	2.0988
	0	0		2.06866	5.46682
	5.02893	1.65164		7.54339	0
	0	0		0	0
	0	0		0	4.84255
	0	0		3.18085	4.75166
	0	0		0	2.31049
	0	0		2.20351	0
	0	0		0	0.811499
	0	0		0	2.12601
	0	2.90535		0	11.6214
	0	0		3.54856	0
	0	0		0	2.97857
	0.704784	0		0	9.79714
	0	0		4.65567	3.16143
	0	0		0	0
	0	0		1.91614	2.63278
	0	0		2.1644	1.98441
	0.791022	0		2.37307	7.48588
	0	0		0.66399	6.18737
	0	0.672482		1.89769	0
	0	0		0	4.8629
	0	0		0	0
	1.2404	0		2.48081	0
	0	0		0	3.95629
	0	1.22907		0	0
	0	3.48506		1.14504	3.48506
	0	0		0	4.54255
	1.98259	0		0	7.77278
	0	0		8.19285	2.86878
	9.17736	0		0	5.04641
	0	0		1.10126	0
	0	0		0	7.77442
	0	1.82329		4.87766	8.20483
	0	4.26555		1.69334	2.13277
	0	0		3.9673	0
	1.12725	3.10477		0	0
	1.72519	0		3.45038	2.73861
	0	0		5.15281	0
	1.68905	3.05174		3.37811	0
	0	1.46308		0	5.85233
	2.3586	0		7.0758	2.68115
	0	0		0	1.70974
	1.40668	1.06372		5.62672	6.38235
	0	0		0	5.47601
	0	2.19991		0	8.79965
	0	0		0	5.99378
	0	1.23539		0.872842	3.70617
	0	0		0	4.10029
	1.95753	0		0	1.24003
	0	0		1.91616	2.37437
	0	2.75859		2.04486	0
	0	1.37211		0	9.60476
	1.19355	1.88106		1.19355	3.76211
	0	0		1.43145	0
	0			3.21202
n =	326	323	n =	326	323
	D'Agostino & Pearson test			D'Agostino & Pearson test
	p-value			p-value
	< 0.0001	< 0.0001		< 0.0001	< 0.0001
	Mann-Whitney test			Mann-Whitney test
	p < 0.0001			p < 0.0001
