# Supplementary material for: Rho GTPase signaling and mDia facilitate endocytosis via presynaptic actin
Source: eLife journal article supplement (doi:10.7554/elife.92755), 2023-12-05
Supplement: fig7-figsupp1-data1 [file elife-92755-fig7-figsupp1-data1-v1.zip]

## Sheet: Figure 7 S1
	Figure 7 S1A			Figure 7 S1B			Figure 7 S1C					Figure 7 S1D
	Invaginations/µm2			ELVs/µm2			Invagination length [µm]					Invagination width [µm]
	WT	mDia1KO		WT	mDia1KO		shCTR + DMSO	shmDia1+3 + DMSO	shCTR + EHT 1864	shmDia1+3 + EHT 1864		shCTR + DMSO	shmDia1+3 + DMSO	shCTR + EHT 1864	shmDia1+3 + EHT 1864
	0	4.52897		1.75974	0		0.099	0.079	0.113	0.156		0.123	0.204	0.149	0.236
	0	0		0	2.00859		0.066	0.061	0.163	0.06		0.144	0.108	0.297	0.13
	0	0		4.14956	4.10663		0.067	0.08	0.124	0.348		0.071	0.114	0.054	0.393
	0	0		2.10026	3.96698		0.074	0.096	0.161	0.257		0.152	0.231	0.16	0.125
	0	0		6.53495	0		0.075	0.096	0.068	0.158		0.115	0.168	0.138	0.146
	0	6.11857		1.07461	2.03952		0.118	0.186	0.068	0.177		0.083	0.062	0.107	0.167
	0	0		1.53871	4.07703		0.132	0.153	0.068	0.279		0.076	0.29	0.107	0.162
	0	0		1.90795	5.73628		0.053	0.176	0.108	0.194		0.092	0.163	0.157	0.101
	1.30736	0		3.92208	1.97201		0.104	0.084	0.145	0.163		0.139	0.14	0.14	0.179
	0	0		2.40687	16.7062		0.126	0.088	0.082	0.185		0.165	0.2	0.106	0.178
	0	0.57256		0	2.29024		0.117	0.144	0.132	0.273		0.142	0.046	0.132	0.192
	0	4.47378		1.77973	4.47378		0.067	0.059	0.186	0.17		0.181	0.131	0.072	0.144
	0	0		1.2877	4.43303		0.056	0.149	0.186	0.193		0.14	0.13	0.072	0.076
	0	0		6.56699	0		0.064	0.057	0.071	0.171		0.094	0.136	0.177	0.177
	0	0		4.6909	1.26978		0.165	0.057	0.044	0.146		0.092	0.128	0.118	0.168
	0	0		0	4.38625		0.044	0.074	0.053	0.067		0.06	0.099	0.086	0.17
	0	0		1.56712	0		0.07	0.101	0.078	0.141		0.089	0.119	0.132	0.216
	0	1.44565		1.25484	2.89131		0.096	0.164	0.086	0.091		0.107	0.206	0.136	0.267
	2.71047	0		0	0		0.105	0.053	0.098	0.106		0.066	0.107	0.126	0.26
	0	0		0	0.972752		0.107	0.062	0.156	0.18		0.125	0.099	0.081	0.208
	0	0.852333		0	4.26166		0.084	0.154	0.066	0.044		0.105	0.173	0.082	0.092
	1.84579	0		5.53736	6.14811		0.094	0.105	0.163	0.067		0.126	0.129	0.168	0.234
	0	1.31482		0	0		0.048	0.119	0.072	0.056		0.069	0.027	0.123	0.227
	0	0		3.80231	0		0.056	0.098	0.091	0.052		0.028	0.208	0.079	0.051
	0.768091	0.829719		2.30427	1.65944		0.066	0.195	0.072	0.067		0.1	0.062	0.155	0.074
	0	0		0	0		0.081	0.298	0.154	0.202		0.042	0.139	0.144	0.158
	0	0		1.06831	1.13713		0.093	0.298	0.083	0.119		0.12	0.139	0.052	0.206
	0	0		0	2.20601		0.192	0.118	0.156	0.159		0.11	0.319	0.126	0.184
	0	0		0	6.64407		0.056	0.152	0.105	0.112		0.17	0.309	0.164	0.161
	0	0		0	2.33461		0.082	0.096	0.18	0.117		0.149	0.179	0.05	0.191
	0	0		0	1.55914		0.153	0.09	0.092	0.147		0.197	0.103	0.132	0.167
	0	0		0	2.31107		0.067	0.067	0.07	0.186		0.103	0.234	0.112	0.215
	0	0		2.72286	3.74156		0.047	0.091	0.142	0.064		0.108	0.245	0.257	0.127
	0	0		0	0		0.06	0.23	0.093	0.141		0.118	0.225	0.144	0.215
	4.40778	0		0	0		0.122	0.072	0.084	0.252		0.043	0.206	0.212	0.265
	0	0		3.84013	34.143		0.059	0.123	0.116	0.123		0.081	0.139	0.196	0.15
	0	1.00332		6.07108	1.00332		0.054	0.134	0.073	0.141		0.085	0.138	0.062	0.215
	0	0		1.99073	0		0.082	0.116	0.249	0.252		0.123	0.1	0.107	0.265
	0	1.01503		0	3.04509		0.088	0.112	0.095	0.137		0.25	0.148	0.264	0.304
	0	0		0	1.95769		0.073	0.063	0.105	0.092		0.022	0.152	0.114	0.184
	0	0		0	2.56178		0.111	0.057	0.102	0.224		0.176	0.051	0.166	0.208
	0	0		2.34041	2.14196		0.139	0.132	0.111	0.142		0.096	0.159	0.171	0.209
	0	0		0	8.00794		0.075	0.128	0.097	0.039		0.12	0.162	0.076	0.089
	0	0		0	2.75451		0.087	0.112	0.078	0.141		0.144	0.212	0.157	0.157
	0	0		0	6.7976		0.135	0.28	0.143	0.133		0.094	0.227	0.286	0.132
	0	1.10888		0	2.21776		0.09	0.16	0.085	0.211		0.143	0.236	0.154	0.327
	0	0		0	0.792795		0.139	0.102	0.082	0.089		0.116	0.172	0.082	0.19
	1.04533	0		4.18131	1.90748		0.137	0.144	0.141	0.185		0.134	0.231	0.161	0.196
	0	1.06478		0	0		0.093	0.181	0.187	0.169		0.199	0.01	0.066	0.14
	0	0		0	0		0.106	0.157	0.182	0.159		0.239	0.313	0.072	0.278
	0	0		1.38119	0.609985		0.11	0.111	0.139	0.297		0.236	0.14	0.212	0.194
	0	0		0	1.13693		0.172	0.1	0.205	0.269		0.11	0.182	0.275	0.168
	0	1.83453		0.869703	1.83453		0.08	0.073	0.102	0.142		0.119	0.193	0.149	0.171
	0	0		1.08503	4.1652		0.042	0.172	0.129	0.14		0.087	0.237	0.149	0.082
	0	0		0	2.00549		0.18	0.12	0.11	0.093		0.228	0.18	0.123	0.288
	0	0		0	0		0.102	0.131	0.129	0.111		0.141	0.299	0.293	0.119
	0	2.97931		0	17.8759		0.078	0.137	0.2	0.154		0.157	0.139	0.21	0.15
	0	0		6.57265	3.86564		0.077	0.231	0.305	0.112		0.075	0.274	0.142	0.061
	0	0		0	1.3178		0.074	0.114	0.143	0.13		0.113	0.248	0.08	0.178
	0	0		0	1.10826		0.06	0.106	0.081	0.122		0.122	0.256	0.098	0.41
	0	0		0	0		0.103	0.075	0.177	0.279		0.187	0.144	0.043	0.247
	0	0		1.83085	3.02254		0.298	0.147	0.308	0.143		0.2	0.07	0.172	0.176
	0	0		1.10629	1.8913		0.099	0.171	0.145	0.109		0.108	0.15	0.115	0.294
	0	0		0	2.19705		0.128	0.357	0.178	0.145		0.145	0.275	0.119	0.223
	2.12972	1.03556		0	2.07111		0.116	0.157	0.196	0.098		0.136	0.254	0.215	0.234
	0	0		7.4416	0		0.086	0.132	0.168	0.086		0.235	0.221	0.271	0.201
	0	0		0.679831	1.16113		0.045	0.245	0.227	0.217		0.082	0.01	0.171	0.238
	0	0		1.44326	9.34965		0.07	0.142	0.114	0.399		0.13	0.261	0.151	0.093
	0	0		0	0		0.092	0.061	0.166	0.119		0.112	0.01	0.164	0.158
	0	1.24078		1.71556	13.6486		0.075	0.282	0.178	0.135		0.101	0.145	0.1	0.153
	0	1.72921		3.48593	8.64603		0.066	0.166	0.141	0.146		0.116	0.177	0.222	0.283
	0	0		1.58246	3.26593		0.073	0.1	0.076	0.181		0.176	0.116	0.177	0.334
	0	0		3.09604	0		0.131	0.203	0.056	0.074		0.135	0.16	0.157	0.18
	0	0		0	0		0.114	0.141	0.148	0.109		0.093	0.364	0.341	0.171
	0	0		0	0		0.194	0.18	0.106	0.083		0.119	0.326	0.01	0.081
	0	0		0	2.2813		0.203	0.16	0.096	0.149		0.062	0.226	0.227	0.116
	0	0		0.637899	8.70217		0.069	0.19	0.096	0.371		0.193	0.164	0.139	0.083
	0	1.32454		0.985611	0			0.501	0.179	0.426			0.387	0.196	0.186
	0	0		0	9.03213			0.096	0.211	0.148			0.106	0.1	0.13
	0	0.432202		2.41503	3.88982			0.111	0.067	0.101			0.155	0.061	0.166
	0	0		1.06005	1.19017			0.089	0.114	0.139			0.224	0.281	0.01
	0	0		0	0			0.068	0.087	0.087			0.209	0.159	0.248
	0	0		0	1.20533			0.125	0.098	0.06			0.092	0.225	0.218
	0	0		0	0			0.115	0.234	0.081			0.051	0.196	0.221
	0	0		3.61588	5.63868			0.132	0.113	0.05			0.233	0.314	0.132
	0	0		0	2.56581			0.168	0.195	0.076			0.162	0.222	0.102
	0	0		0	0.952954			0.218	0.172	0.13			0.073	0.238	0.237
	0	0		6.07429	2.29924			0.217	0.091	0.134			0.178	0.164	0.117
	0	0		0	3.35086			0.06	0.089	0.154			0.01	0.133	0.189
	0	0		0	3.7834			0.236	0.079	0.15			0.343	0.195	0.183
	0	0.78312		0	4.69872			0.079	0.071	0.143			0.109	0.162	0.141
	0	0		0	1.76213			0.085	0.183	0.159			0.112	0.276	0.115
	0	0		0	5.36196			0.127	0.155	0.113			0.189	0.165	0.192
	0	0		0	0			0.128	0.149	0.07			0.1	0.188	0.177
	0	0		0	2.76023			0.057	0.122	0.143			0.092	0.2	0.242
	0	0		0	1.19983			0.147	0.107	0.114			0.126	0.125	0.17
	0			0				0.103	0.195	0.096			0.178	0.121	0.124
	0.415117			0				0.095	0.11	0.082			0.166	0.205	0.235
	0			3.8995				0.149	0.083	0.1			0.248	0.176	0.087
	0			0				0.208	0.189	0.128			0.494	0.179	0.222
	0			0				0.077	0.17	0.077			0.211	0.262	0.086
	0			0				0.139	0.121	0.103			0.184	0.111	0.262
	0			2.73638				0.086	0.078	0.204			0.377	0.23	0.078
n =	103	96	n =	103	96			0.254	0.079	0.102			0.297	0.134	0.154
								0.146	0.161	0.076			0.215	0.09	0.184
	D'Agostino & Pearson test			D'Agostino & Pearson test				0.108	0.095	0.212			0.226	0.247	0.394
	p-value			p-value				0.128	0.069	0.085			0.209	0.241	0.129
	< 0.0001	< 0.0001		< 0.0001	< 0.0001			0.198	0.187	0.057			0.094	0.223	0.138
								0.101	0.112	0.144			0.272	0.283	0.311
	Mann-Whitney test			Mann-Whitney test				0.054	0.076	0.184			0.336	0.229	0.163
	p = 0.0098			p < 0.0001				0.119	0.144	0.142			0.118	0.341	0.173
								0.108	0.092	0.12			0.171	0.233	0.193
								0.071	0.058	0.218			0.157	0.14	0.303
								0.142	0.086	0.237			0.173	0.138	0.142
								0.087	0.187	0.247			0.288	0.414	0.327
								0.097	0.218	0.127			0.23	0.183	0.037
								0.063	0.113	0.156			0.148	0.113	0.271
								0.063	0.065	0.178			0.274	0.199	0.181
								0.225	0.169	0.069			0.141	0.125	0.214
								0.111	0.058	0.106			0.177	0.128	0.087
								0.524	0.09	0.095			0.191	0.158	0.108
								0.139	0.208	0.134			0.115	0.341	0.164
								0.193	0.346	0.087			0.295	0.155	0.355
								0.165	0.111	0.15			0.15	0.18	0.29
								0.105	0.106	0.15			0.176	0.232	0.29
								0.125	0.13	0.12			0.17	0.237	0.124
								0.148	0.069	0.278			0.118	0.258	0.133
								0.144	0.438	0.099			0.189	0.324	0.124
								0.126	0.131	0.099			0.224	0.267	0.148
								0.097	0.228	0.161			0.113	0.114	0.318
								0.129	0.164	0.082			0.185	0.248	0.122
								0.084	0.066	0.063			0.137	0.135	0.155
								0.152	0.291	0.084			0.111	0.01	0.168
								0.166	0.164	0.341			0.191	0.202	0.244
								0.18	0.141	0.121			0.169	0.321	0.134
								0.127	0.073	0.087			0.182	0.215	0.166
								0.134	0.142	0.041			0.28	0.186	0.118
								0.134	0.073	0.097			0.08	0.314	0.212
								0.094	0.093	0.095			0.218	0.106	0.181
								0.11	0.102	0.223			0.199	0.191	0.175
								0.108	0.112	0.225			0.186	0.119	0.281
									0.183	0.159				0.302	0.224
									0.174	0.094				0.235	0.09
									0.117	0.095				0.203	0.181
									0.079	0.223				0.128	0.175
									0.072	0.225				0.222	0.281
									0.152	0.104				0.156	0.127
									0.176	0.108				0.091	0.103
									0.096	0.06				0.215	0.213
									0.185	0.143				0.404	0.312
									0.171	0.066				0.223	0.285
									0.07	0.149				0.297	0.247
									0.087	0.158				0.196	0.293
									0.134	0.216				0.125	0.331
									0.249	0.157				0.281	0.388
									0.063	0.113				0.205	0.233
									0.134	0.137				0.145	0.24
									0.068	0.094				0.248	0.186
									0.081	0.101				0.173	0.152
									0.07	0.2				0.109	0.203
									0.164	0.226				0.075	0.213
									0.164	0.109				0.075	0.173
									0.113	0.206				0.25	0.274
									0.123	0.167				0.262	0.218
									0.206	0.126				0.362	0.14
									0.076	0.059				0.146	0.135
									0.245	0.077				0.317	0.1
									0.122	0.187				0.141	0.136
									0.116	0.208				0.111	0.2
									0.116	0.143				0.175	0.197
									0.134	0.151				0.346	0.143
									0.087	0.099				0.233	0.131
									0.135	0.14				0.156	0.209
									0.13	0.095				0.3	0.148
									0.11	0.1				0.247	0.177
									0.146	0.082				0.156	0.154
										0.09					0.156
										0.186					0.481
										0.124					0.176
										0.141					0.21
										0.185					0.16
										0.132					0.305
										0.226					0.194
										0.097					0.146
										0.152					0.312
										0.118					0.187
										0.089					0.181
										0.086					0.08
										0.142					0.252
						n =	77	141	176	189	n =	77	141	176	189
							D'Agostino & Pearson test					D'Agostino & Pearson test
							p-value					p-value
							< 0.0001	< 0.0001	< 0.0001	< 0.0001		0.0949	< 0.0001	0.0058	< 0.0001
							Kruskal-Wallis with Dunn's post test					Kruskal-Wallis with Dunn's post test
							p-value					p-value
							< 0.0001	shCTR + DMSO vs. shmDia1+3 + DMSO				< 0.0001	shCTR + DMSO vs. shmDia1+3 + DMSO
							< 0.0001	shCTR + DMSO vs. shCTR + EHT 1864				< 0.0001	shCTR + DMSO vs. shCTR + EHT 1864
							< 0.0001	shCTR + DMSO vs. shmDia1+3 + EHT1864				< 0.0001	shCTR + DMSO vs. shmDia1+3 + EHT1864
							> 0.9999	shmDia1+3 + DMSO vs. shCTR + EHT 1864				> 0.9999	shmDia1+3 + DMSO vs. shCTR + EHT 1864
							> 0.9999	shmDia1+3 + DMSO vs. shmDia1+3 + EHT1864				> 0.9999	shmDia1+3 + DMSO vs. shmDia1+3 + EHT1864
							0.4668	shCTR + EHT 1864 vs. shmDia1+3 + EHT1864				0.4668	shCTR + EHT 1864 vs. shmDia1+3 + EHT1864
