# Supplementary material for: Rho GTPase signaling and mDia facilitate endocytosis via presynaptic actin
Source: eLife. 2024 Mar 19;12:RP92755. doi: 10.7554/eLife.92755 (PMC10950329; doi:10.7554/eLife.92755)
Supplement: Supplementary file 1. [file elife-92755-supp1.xlsx]

## Sheet: Sheet1
Supporting Table 1
Reagent type (species) or resource	Designation	Source or reference	Identifiers	Additional information
sequence-based reagent	tataaccggtcaccATGGACAAAGACTGCG	This study	pSNAP-N1 forward	For subcloning SNAP from pSNAPf (New England BioLabs Inc.; Cat#N9183S)
sequence-based reagent	tatagcggccgctTTAACCCAGCCCAGGC	This study	pSNAP-N1 reverse	For subcloning SNAP from pSNAPf (New England BioLabs Inc.; Cat#N9183S)
sequence-based reagent	CCGGTatttaaatggatcccctgcagggcggccgcttaattaatctagatgtacag	This study	pFUG_hSyn1_MCS forward	For inserting a multiple cloning site in pFug_hSyn1 (Christian Rosenmund)
sequence-based reagent	AATTCtgtacatctagattaattaagcggccgccctgcaggggatccatttaaata	This study	pFUG_hSyn1_MCS reverse	For inserting a multiple cloning site in pFug_hSyn1 (Christian Rosenmund)
sequence-based reagent	aatagatctatgAACTCCTCTGCATCGTACGGAGATG	This study	ΔN-mDia1 forward	For introducing a new start codon shifted by 60 Amino Acids in mDia1
sequence-based reagent	gcgaccggTCCAGATCCGC	This study	ΔN-mDia1reverse	For introducing a new start codon shifted by 60 Amino Acids in mDia1
sequence-based reagent	TCGAGACACCgcGTCTGCAGATC	This study	mDia1_K994A forward	For introducing Lysine-994 to Alanine point mutation (K994A) in mDia1
sequence-based reagent	AGTTTACAAAGGAAGCTG	This study	mDia1_K994A reverse	For introducing Lysine-994 to Alanine point mutation (K994A) in mDia1
sequence-based reagent	GAGCGCCGGCgcGAGCTCGGTGCTGG	This study	Dynamin1_K44A forward	For introducing Lysine-44 to Alanine point mutation (K44A) in Dynamin1
sequence-based reagent	TGGCCGCCTACCACGGCG	This study	Dynamin1_K44A reverse	For introducing Lysine-44 to Alanine point mutation (K44A) in Dynamin1
sequence-based reagent	caccgactctagaggatctaccggtcgccaccATGGACGTGGTGAATCAGCTGGTG	This study	Synaptophysin-2xpHluorin forward	For subcloning Synaptophysin-2xpHluorin into shCTRmiR backbone (Peter S. McPherson)
sequence-based reagent	ccactggtcgactcaCTACCTC	This study	Synaptophysin-2xpHluorin reverse	For subcloning Synaptophysin-2xpHluorin into shCTRmiR backbone (Peter S. McPherson)
sequence-based reagent	TGCTGaatgcttgaccctaccatcaaGTTTTGGCCACTGACTGACttgatggtggtcaagcatt	This study	shmDia1miR forward	For inserting miRmDia1 into Synaptophysin-2xpHluorin_shRNAmiR backbone
sequence-based reagent	CCTGaatgcttgaccctaccatcaaGTCAGTCAGTGGCCAAAACttgatggtggtcaagcattC	This study	shmDia1miR reverse	For inserting miRmDia1 into Synaptophysin-2xpHluorin_shRNAmiR backbone
sequence-based reagent	tccagTTTTTGGAAATTAATTAACAGAGGGCCCTGCGTAT	This study	Gibson_hSyn1 forward	For inserting hSyn1 promotor in BFP shCTR lentiviral backbone
sequence-based reagent	tccttaatcagctcgctCATTACCTTTCTCTTCTTTTTTGGATCTACCT	This study	Gibson_hSyn1 reverse	For inserting hSyn1 promotor in BFP shCTR lentiviral backbone
sequence-based reagent	AAAAGAAGAGAAAGGTAATGagcgagctgattaaggagaaca	This study	Gibson_BFP forward	For subcloning BFP from mTAGBFP (Addgene; #Cat 105772) in shCTR lentiviral backbone
sequence-based reagent	tgatatcgaattaattctagTCAGTTaagcttgtgccccagtttgctaggga	This study	Gibson_BFP reverse	For subcloning BFP from mTAGBFP (Addgene; #Cat 105772) in shCTR lentiviral backbone
sequence-based reagent	GATCCCCgcctaaatggtcaaggagataTTCAAGAGAtatctccttgaccatttaggcTTTTTGGAAATTAAT	This study	shmDia1 forward	For generating lentiviral vector for the knockdown of mouse mDia1
sequence-based reagent	TAATTTCCAAAAAgcctaaatggtcaaggagataTCTCTTGAAtatctccttgaccatttaggcGGG	This study	shmDia1 reverse	For generating lentiviral vector for the knockdown of mouse mDia1
sequence-based reagent	GATCCCCgccctaatccagaatcttgtaTTCAAGAGAtacaagattctggattagggcTTTTTGGAAATTAAT	This study	shmDia3 forward	For generating lentiviral vector for the knockdown of mouse mDia3
sequence-based reagent	TAATTTCCAAAAAGccctaatccagaatcttgtaTCTCTTGAAtacaagattctggattagggcGGG	This study	shmDia3 reverse	For generating lentiviral vector for the knockdown of mouse mDia3
	*lower case – Nucleotides that do not anneal to the backbone
	**Underline – sense and antisense sequence of shRNA
