# Supplementary figures and images for: How am I using inquiry-based learning to improve my practice and to encourage higher order thinking among my students of mathematics?
Source: eLife journal article supplement (doi:10.7554/elife.92755), 2012-01-01

Figure 1 S1

A

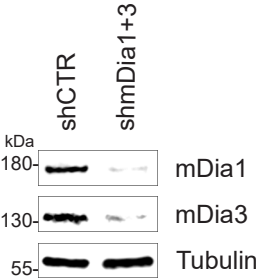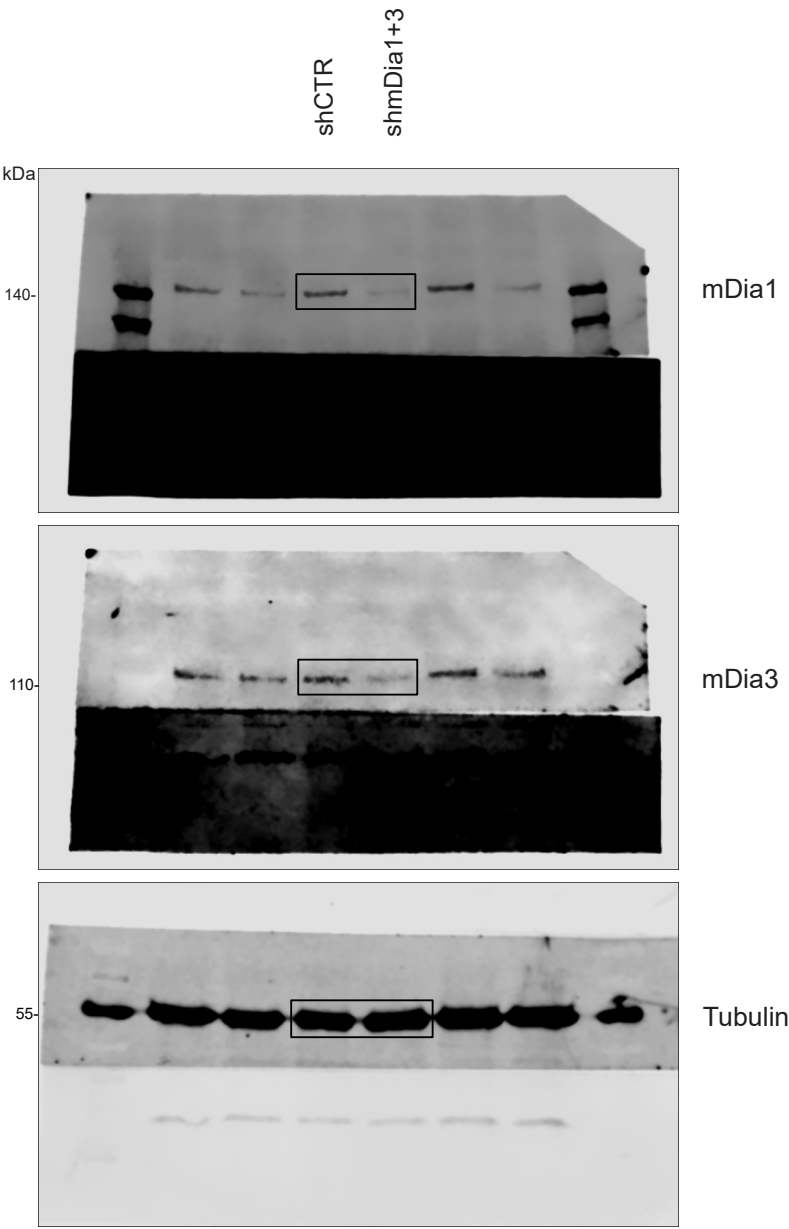

Supplement: fig1-figsupp1-data5 [file elife-92755-fig1-figsupp1-data5-v1.zip]

Figure 3

F

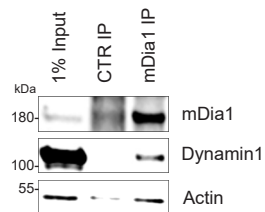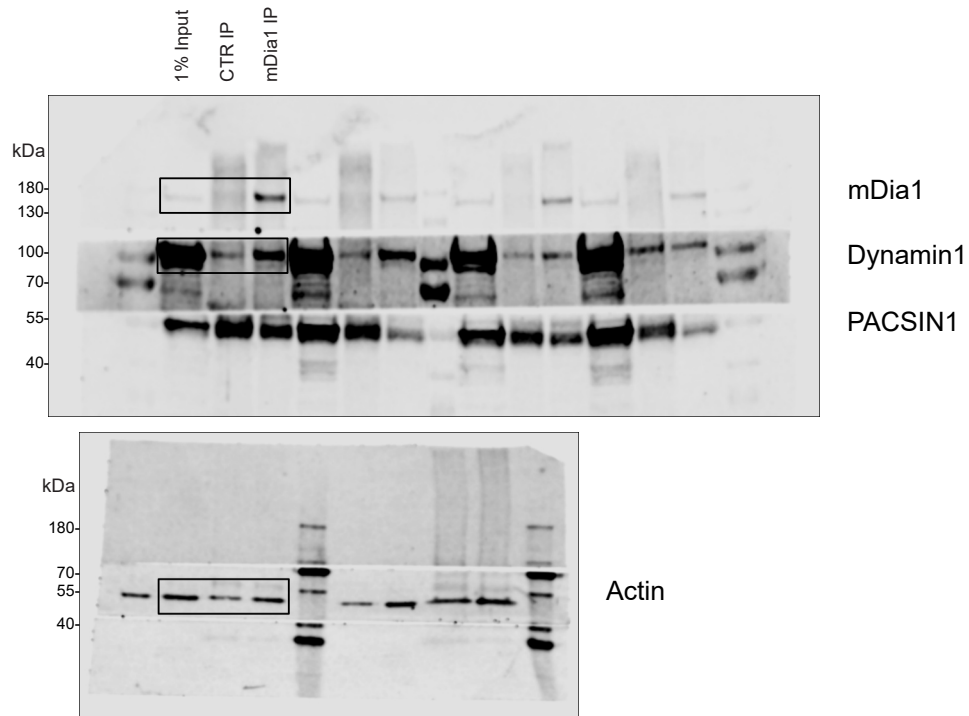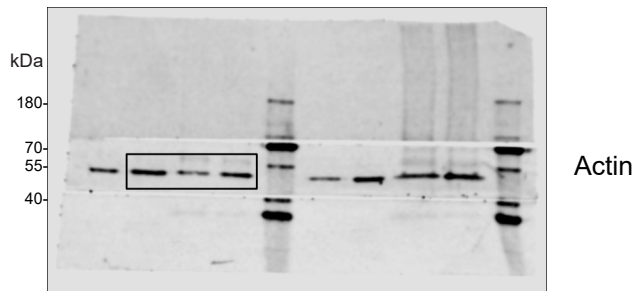

Supplement: fig3-data4 [file elife-92755-fig3-data4-v1.zip]

Figure 3 S1

E

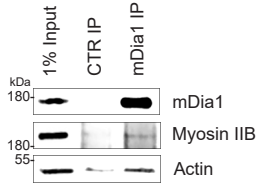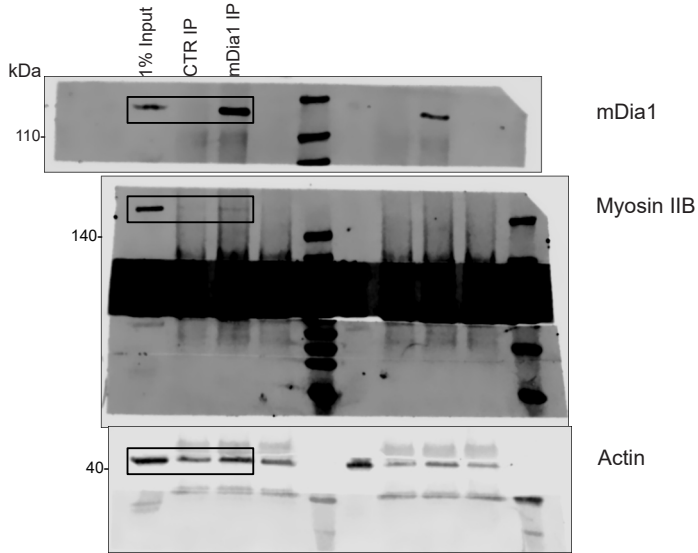

Supplement: fig3-figsupp1-data10 [file elife-92755-fig3-figsupp1-data10-v1.zip]

Figure 3 S1

A

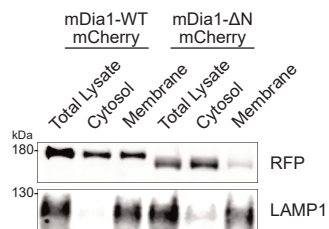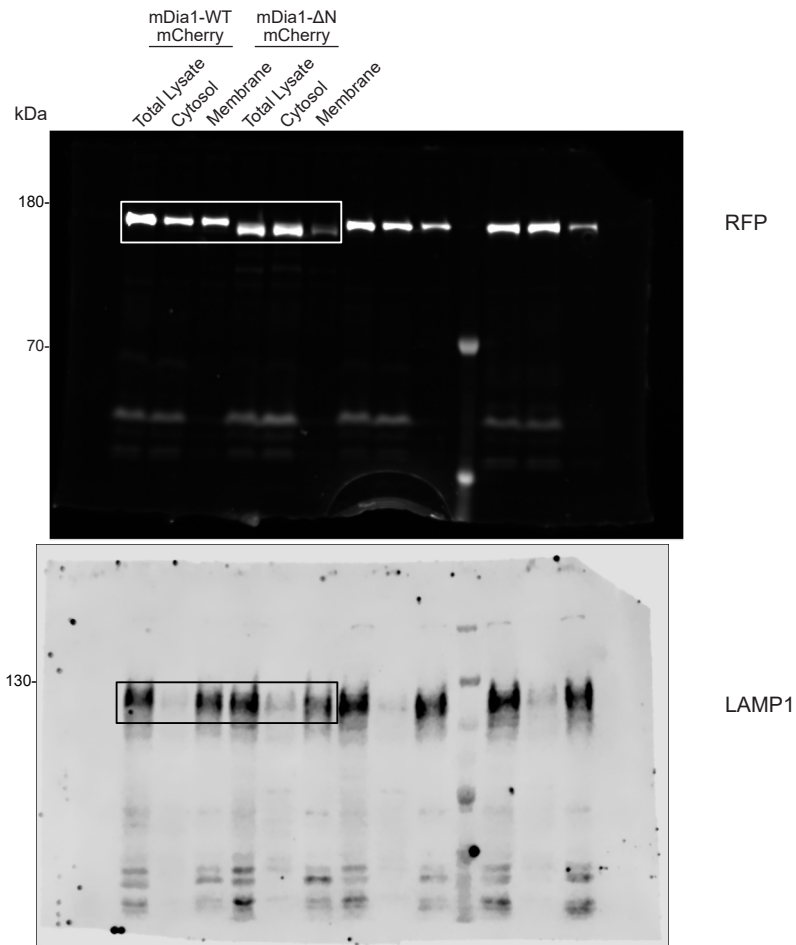

Supplement: fig3-figsupp1-data3 [file elife-92755-fig3-figsupp1-data3-v1.zip]

Figure 5

E

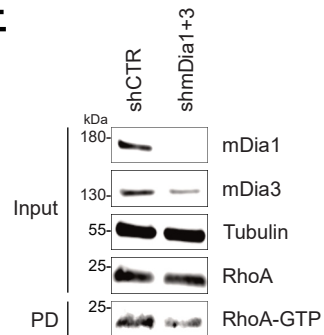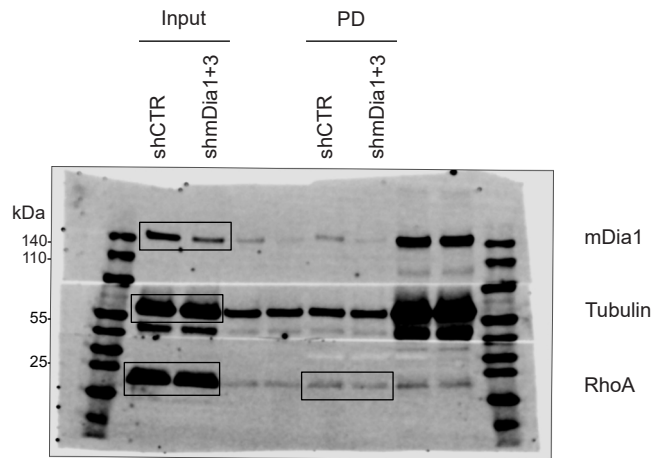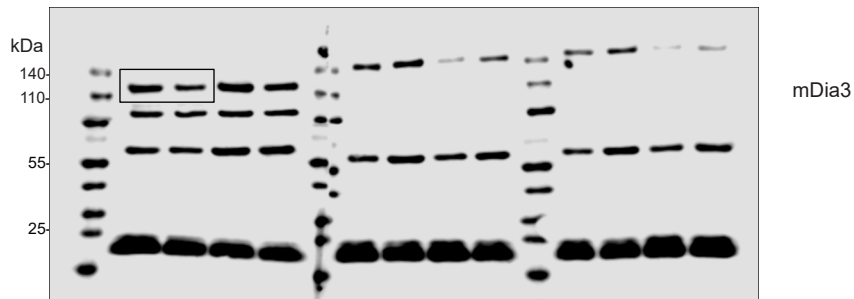

Supplement: fig5-data3 [file elife-92755-fig5-data3-v1.zip]

# Figure 5

F

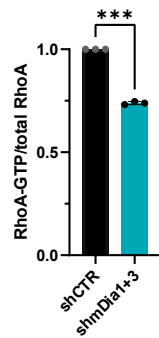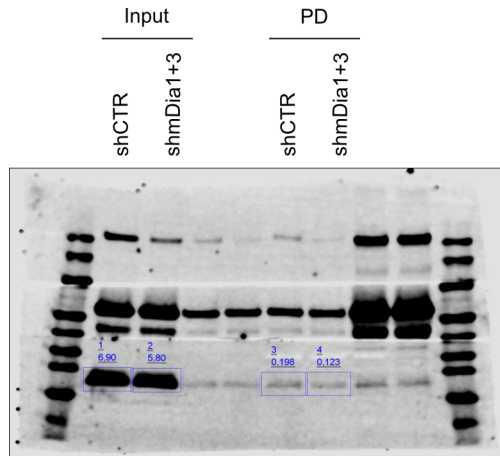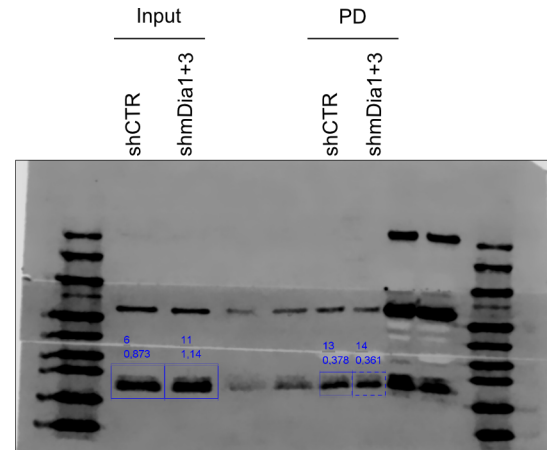

RhoA

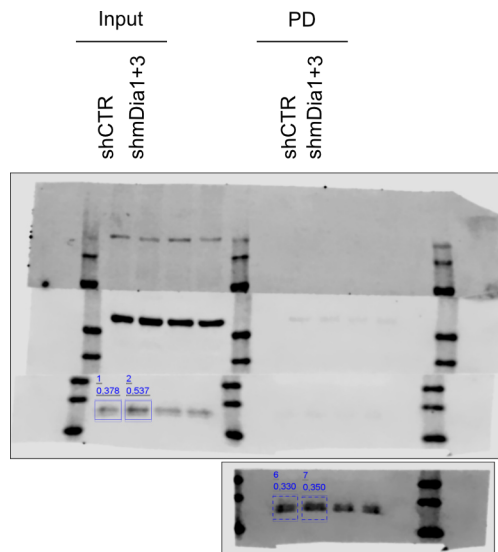

RhoA

RhoA

\* Pulldown part of blot  
reincubated with antibody  
to increase signal

Supplement: fig5-data5 [file elife-92755-fig5-data5-v1.zip]

Figure 6

B

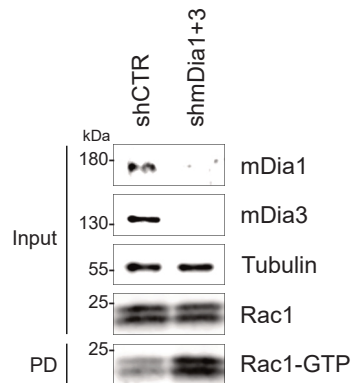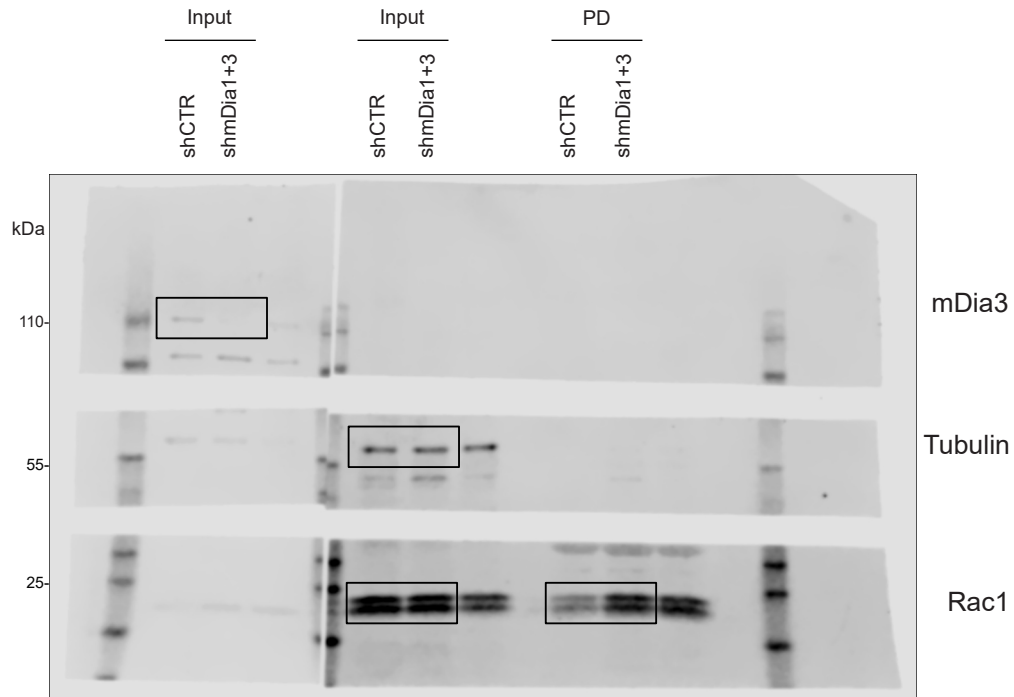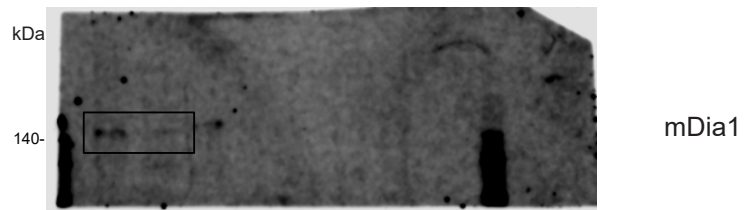

Supplement: fig6-data3 [file elife-92755-fig6-data3-v1.zip]

Figure 6

C

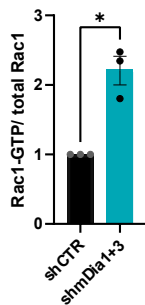

Input PD

shCTR shmDia1+3 shCTR shmDia1+3

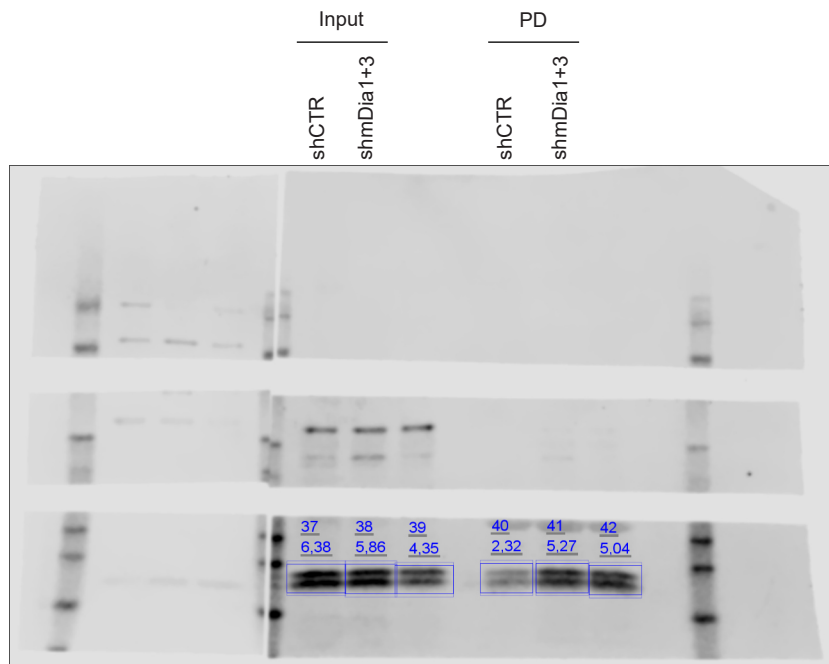

Rac1

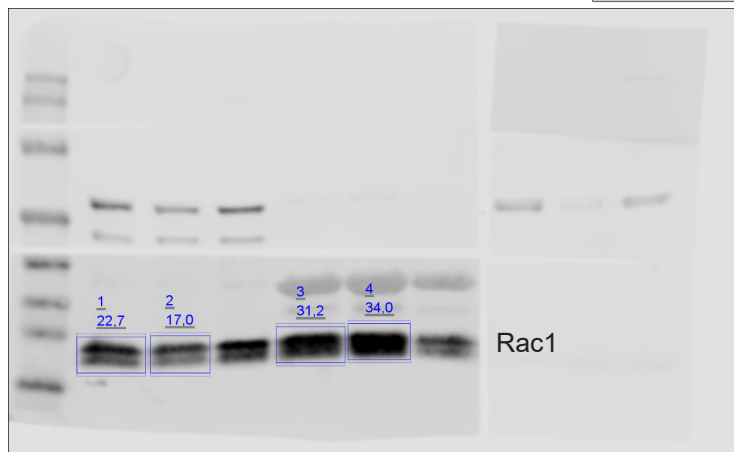

Rac1

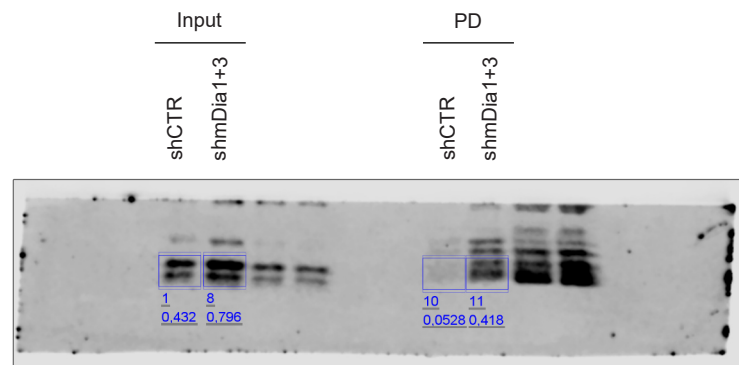

Rac1

Supplement: fig6-data6 [file elife-92755-fig6-data6-v1.zip]

Figure 6 S1

A

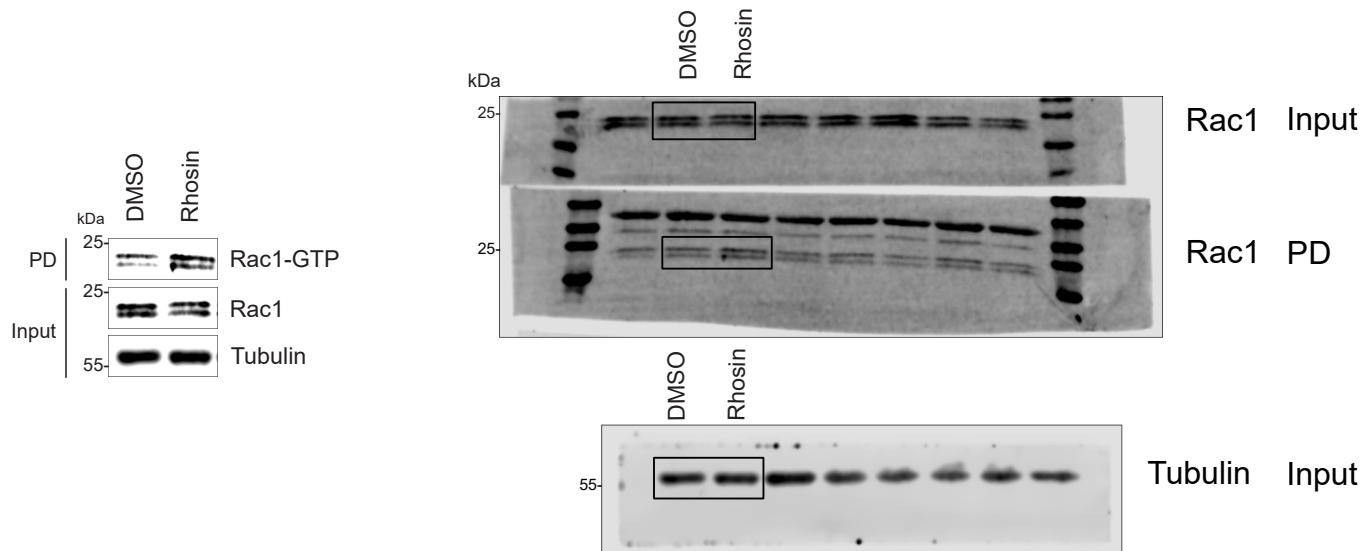

Supplement: fig6-figsupp1-data3 [file elife-92755-fig6-figsupp1-data3-v1.zip]

Figure 6 S1

G

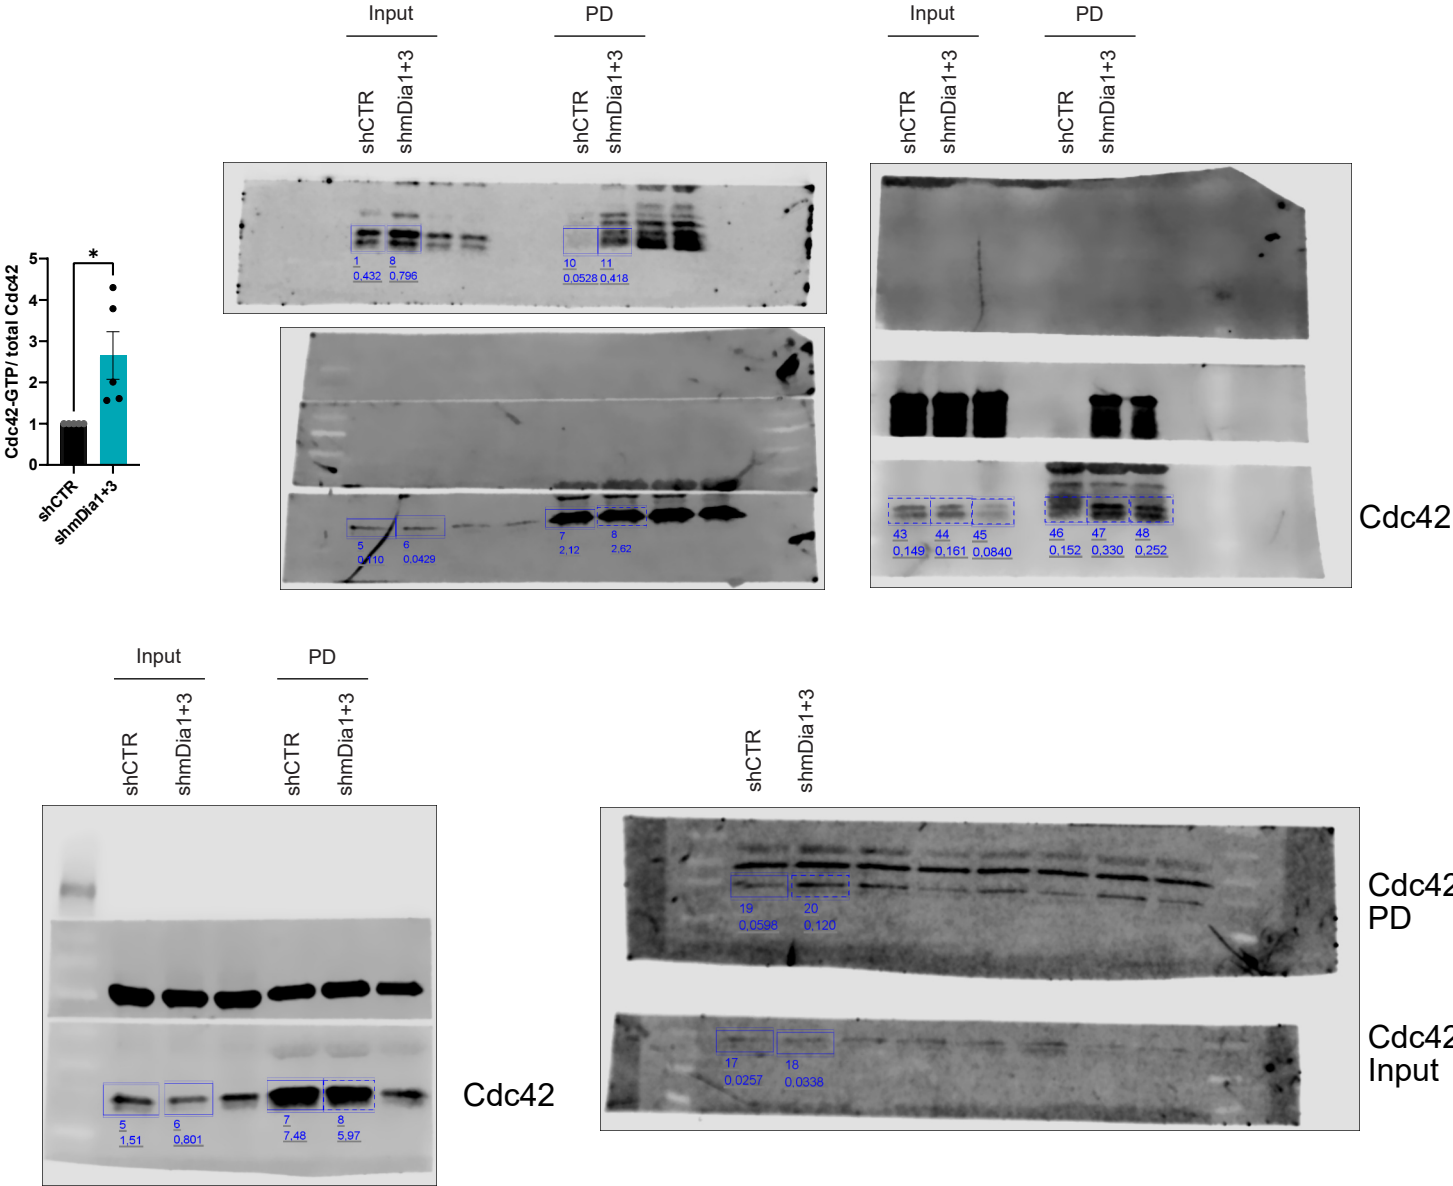

Supplement: fig6-figsupp1-data6 [file elife-92755-fig6-figsupp1-data6-v1.zip]
